# Supplementary material for: An Exercise-Induced Metabolic Shield in Distant Organs Blocks Cancer Progression and Metastatic Dissemination
Source: Oxford University Press journal article supplement (doi:10.1158/0008-5472.can-22-0237), 2022-09-09
Supplement: can-22-0237_supplementary_table_s1_suppst1.xlsx [file can-22-0237_supplementary_table_s1_suppst1.xlsx]

## Sheet: lung
Supplementary Table S1 Mouse differentially expressed proteins
-Log Student's t-test p-value Active_Passive	Student's t-test Difference Active_Passive	Protein IDs	Majority protein IDs	Protein names	Gene names
1.35903	0.749746	F8WIZ7;Q8BXR9;V9GXX3	F8WIZ7;Q8BXR9;V9GXX3	Oxysterol-binding protein;Oxysterol-binding protein-related protein 6	Osbpl6
1.37163	0.669087	P52795	P52795	Ephrin-B1	Efnb1
1.59397	2.06321	P30677	P30677	Guanine nucleotide-binding protein subunit alpha-14	Gna14
1.69217	3.68857	E9Q3T3;L0N7N1	E9Q3T3;L0N7N1		Kif14
1.77828	0.451324	P63037;B1AXY1;B1AXY0;B1AXX9	P63037;B1AXY1	DnaJ homolog subfamily A member 1	Dnaja1
1.49211	1.75366	E9Q3G8	E9Q3G8		Nup153
1.67752	0.600916	A0A140T8J4;Q9R257	A0A140T8J4;Q9R257	Heme-binding protein 1	Hebp1
5.0206	5.56061	Q9D2V8;A0A0J9YUD0;D3YWD5	Q9D2V8;A0A0J9YUD0;D3YWD5	Major facilitator superfamily domain-containing protein 10	Mfsd10
2.37541	1.05929	Q9CY46;Q9QXA5;D3YTP8;A0A1B0GQZ9;A0A1B0GRR9	Q9CY46;Q9QXA5;D3YTP8;A0A1B0GQZ9;A0A1B0GRR9	U6 snRNA-associated Sm-like protein LSm4	Lsm4
2.05679	0.992957	P29416	P29416	Beta-hexosaminidase subunit alpha	Hexa
1.3023	0.419221	Q5UE59;E9Q7C9;Q7TNF4;Q8CD76;O88447;F6UYN4;D3YXZ3;Q91YS4;O88448	Q5UE59;E9Q7C9;Q7TNF4;Q8CD76;O88447	Kinesin light chain 1	Klc1
1.4401	1.60033	G3UX99;G3UZY2;A2A439;P97493	G3UX99;G3UZY2;A2A439;P97493	Thioredoxin, mitochondrial	Txn2
1.57478	0.479584	Q9CWS0;D3YU15	Q9CWS0;D3YU15	N(G),N(G)-dimethylarginine dimethylaminohydrolase 1	Ddah1
1.6174	0.563818	Q8BWF0	Q8BWF0	Succinate-semialdehyde dehydrogenase, mitochondrial	Aldh5a1
1.32411	1.41907	Q80XI4	Q80XI4	Phosphatidylinositol 5-phosphate 4-kinase type-2 beta	Pip4k2b
1.7033	1.48572	A0A0R4J0T8;Q9D8S3	A0A0R4J0T8;Q9D8S3	ADP-ribosylation factor GTPase-activating protein 3	Arfgap3
1.82319	0.985054	A0A0N4SUH8;Q9QZ23;D3Z285	A0A0N4SUH8;Q9QZ23;D3Z285	NFU1 iron-sulfur cluster scaffold homolog, mitochondrial	Nfu1
1.6186	0.765144	Q91WU0	Q91WU0		Ces1f
1.78199	2.47337	M0QW74;B1ATD5;B1ATD4;R4GML8;Q8K296	M0QW74;B1ATD5;B1ATD4;R4GML8;Q8K296	Myotubularin-related protein 3	Mtmr3
1.64983	2.30199	O88958;D3Z0R5;D3YWR1;Q9CRC9	O88958;D3Z0R5;D3YWR1;Q9CRC9	Glucosamine-6-phosphate isomerase 1;Glucosamine-6-phosphate isomerase 2	Gnpda1;Gnpda2
2.20755	1.90085	Q6PIU9	Q6PIU9	Uncharacterized protein FLJ45252 homolog
1.55437	1.64148	Q9Z2Z6	Q9Z2Z6	Mitochondrial carnitine/acylcarnitine carrier protein	Slc25a20
1.65226	0.959669	A0A0A6YXE3;A0A0A6YWB0;G3X9Q0;A0A0A6YVV8;Q9JKP5;A0A0A6YXP3;S4R267;Q8R003;A0A0A6YXL7;A0A0A6YWJ5;Q3U570;A0A0A6YWG1;Q3U581;A0A0A6YXQ4	A0A0A6YXE3;A0A0A6YWB0;G3X9Q0;A0A0A6YVV8;Q9JKP5;A0A0A6YXP3	Muscleblind-like protein 1	Mbnl1
1.34024	-0.184543	Q60865;F6YLI0	Q60865	Caprin-1	Caprin1
1.42356	-1.37674	Q61017	Q61017	Guanine nucleotide-binding protein G(I)/G(S)/G(O) subunit gamma-T2	Gngt2
1.94911	-1.04459	E9QNL5;P52840;D3Z3G5;Q91W19	E9QNL5;P52840;D3Z3G5;Q91W19	Sulfotransferase;Sulfotransferase 1A1	Sult1a1
1.63202	-1.59468	A0A1L1SQA2;Q9CQV1	A0A1L1SQA2;Q9CQV1	Mitochondrial import inner membrane translocase subunit TIM16	Pam16
1.69385	-0.521744	B1AXN9;P18654;B1AXP0;Q9WUT3;B1AXN5;F6UG16;B1AXN8;E9Q6Q5;A2CEE6;A2CEE5;E9PUP0;A2CEE7;E9QK39;E9Q6G0;E9Q4Q9;E9Q1M8;A0A1D5RM97;E9Q8S5;B1AST8;B1AST7;E9QLW6;E9Q1Q1;Q7TPS0;Q8C0P0;Q3U214;Q9R1L5;Q60592	B1AXN9;P18654	Ribosomal protein S6 kinase alpha-3	Rps6ka3
1.85279	-1.56774	Q61102	Q61102	ATP-binding cassette sub-family B member 7, mitochondrial	Abcb7
1.5892	-0.262461	P14115	P14115	60S ribosomal protein L27a	Rpl27a
1.50751	-0.803169	S4R1X1;Q7TMQ7	S4R1X1;Q7TMQ7	WD repeat-containing protein 91	Wdr91
1.58569	-0.658159	Q99J36	Q99J36	THUMP domain-containing protein 1	Thumpd1
1.34044	-0.257645	P08905	P08905	Lysozyme C-2	Lyz2
2.33274	-0.289675	P62743;A0A0U1RPS0;A0A0U1RQ06	P62743;A0A0U1RPS0	AP-2 complex subunit sigma	Ap2s1
1.74086	-0.458393	E9QPX1;P39061	E9QPX1;P39061	Collagen alpha-1(XVIII) chain;Endostatin	Col18a1
2.06655	-2.62499	D3YXG2;Q9D997;Q9QZ08	D3YXG2;Q9D997;Q9QZ08	N-acetyl-D-glucosamine kinase	Nagk
1.43485	-1.45476	B8JJI4;Q6QD59	B8JJI4;Q6QD59	Vesicle transport protein SEC20	Bnip1
4.39077	-0.637332	E9Q035;F7BAE9;F7CJN9;E9Q2Q7;E9Q939;CON__Q2HJF0;P47758	E9Q035		Gm20425
1.98946	-2.16006	Q9Z1M2;A0A140LIF8	Q9Z1M2;A0A140LIF8		Irgm2
1.3996	-1.52959	Q91YD9;Q9CXQ9	Q91YD9	Neural Wiskott-Aldrich syndrome protein	Wasl
1.83247	-1.05958	Q61263;A0A087WSJ5;A0A087WNN8	Q61263	Sterol O-acyltransferase 1	Soat1
1.57165	-0.404581	J7NUP1;Q60766	J7NUP1;Q60766	Immunity-related GTPase family M protein 1	Irgm1
1.53801	-0.981998	O08582	O08582	GTP-binding protein 1	Gtpbp1
1.46117	-0.388172	P21995	P21995	Embigin	Emb
1.67355	-1.02339	E9PWT4;E9QJR9;P14429;P79568;P14430;L7N260;P14431	E9PWT4;E9QJR9;P14429;P79568;P14430;L7N260;P14431	H-2 class I histocompatibility antigen, Q7 alpha chain;H-2 class I histocompatibility antigen, Q8 alpha chain;H-2 class I histocompatibility antigen, Q9 alpha chain	H2-Q7;H2-Q6;H2-Q8;H2-Q9
1.79793	-0.743322	Q5SVR0	Q5SVR0	TBC1 domain family member 9B	Tbc1d9b
2.03155	-0.838071	A2CG35;P35283	A2CG35;P35283	Ras-related protein Rab-12	Rab12
1.5005	-0.824702	Q60772	Q60772	Cyclin-dependent kinase 4 inhibitor C	Cdkn2c
1.59168	-0.497745	Q9CQ73;E0CXK9;E0CX59;A0A140LJB0	Q9CQ73;E0CXK9;E0CX59		Pkp2
1.49796	-0.442385	Q9EQQ2	Q9EQQ2	Protein YIPF5	Yipf5
1.45011	-0.288588	P63328;E9Q6P2;G3X8U7;E0CZ78;P48453;P48455	P63328	Serine/threonine-protein phosphatase 2B catalytic subunit alpha isoform	Ppp3ca
1.32222	-1.49901	Q9EQI5	Q9EQI5		Ppbp
1.38167	-0.66821	Q3UZ39;A0A087WSF5;E9Q9T1;A0A087WPK3;A0A087WPT0;G5E8E1;A0A087WNU6	Q3UZ39	Leucine-rich repeat flightless-interacting protein 1	Lrrfip1
1.78076	-0.679408	Q9D1M4	Q9D1M4	Eukaryotic translation elongation factor 1 epsilon-1	Eef1e1
1.42653	-0.972168	Q80W54;I7HIP5	Q80W54	CAAX prenyl protease 1 homolog	Zmpste24
1.36877	-1.91426	G3X9J6;E9Q9M1;Q3V1L4	G3X9J6;E9Q9M1;Q3V1L4	Cytosolic purine 5-nucleotidase	Nt5c2
2.50409	-1.09087	A2AHX7;A2AHX8;A2AHX9;Q9QWX2;Q64373	A2AHX7;A2AHX8;A2AHX9;Q9QWX2;Q64373	Bcl-2-like protein 1	Bcl2l1
1.31892	-1.31634	P21447;P06795;A0A0G2JF49;P21440	P21447;P06795	Multidrug resistance protein 1A;Multidrug resistance protein 1B	Abcb1a;Abcb1b
1.68274	-0.704326	Q8C3V4;A0A087WSP5;P42225;Q99K94;Q8CFQ1;A0A087WRI1;A0A087WSQ5	Q8C3V4;A0A087WSP5;P42225;Q99K94	Signal transducer and activator of transcription;Signal transducer and activator of transcription 1	Stat1

## Sheet: lymph
-Log Student's t-test p-value Active_Passive	Student's t-test Difference Active_Passive	Protein IDs	Majority protein IDs	Protein names	Gene names
3.58261	-2.97436	Q7TT50	Q7TT50	Serine/threonine-protein kinase MRCK beta	Cdc42bpb
1.32188	-0.82952	A0A0R4J047;Q9CYI4;D3Z765;D3YZ82;D6REI1;D6RGP6	A0A0R4J047;Q9CYI4;D3Z765	Putative RNA-binding protein Luc7-like 1	Luc7l
1.31627	-5.01382	Q14BI5	Q14BI5		Myom2
2.72125	-1.77909	P62984;A0A0A6YW67;E9Q9J0;E9Q5F6;E9QNP0;Q5SX22;P0CG49;P0CG50;E9Q4P0;D3YYZ2	P62984;A0A0A6YW67;E9Q9J0;E9Q5F6;E9QNP0;Q5SX22;P0CG49;P0CG50;E9Q4P0;D3YYZ2	Ubiquitin-60S ribosomal protein L40;Ubiquitin;60S ribosomal protein L40;Polyubiquitin-B;Ubiquitin;Polyubiquitin-C;Ubiquitin;Ubiquitin-related 1;Ubiquitin-related 2	Uba52;Ubc;Kxd1;Ubb;Gm5239
2.806	-2.78816	A0A087WR57;Q91XC8;A0A087WRC6	A0A087WR57;Q91XC8;A0A087WRC6	Death-associated protein 1	Dap
2.42055	-0.736764	G5DDB7;Q8R3B1;Q05DG3	G5DDB7;Q8R3B1;Q05DG3	Phosphoinositide phospholipase C;1-phosphatidylinositol 4,5-bisphosphate phosphodiesterase delta-1	Plcd1
2.58174	-2.2004	Q9R0H2	Q9R0H2	Endomucin	Emcn
1.45325	-0.835171	B7ZNK6;Q64191	B7ZNK6;Q64191	N(4)-(beta-N-acetylglucosaminyl)-L-asparaginase;Glycosylasparaginase alpha chain;Glycosylasparaginase beta chain	Aga
1.66886	-1.14701	E9Q794;Q3U3A7;Q3UII8;Q924K8;F8WHY8;E9PX23;Q8K4B0;H3BLE1	E9Q794;Q3U3A7;Q3UII8;Q924K8;F8WHY8;E9PX23;Q8K4B0	Metastasis-associated protein MTA3;Metastasis-associated protein MTA1	Mta3;Mta1
1.33523	-0.682899	P43276	P43276	Histone H1.5	Hist1h1b
1.59226	-0.604503	Q9CPP6;D3YTQ8	Q9CPP6	NADH dehydrogenase [ubiquinone] 1 alpha subcomplex subunit 5	Ndufa5
1.85824	-1.00254	A0A0R4J0J0;Q9JHU2;Q3UVT7;D3Z486	A0A0R4J0J0;Q9JHU2;Q3UVT7	Palmdelphin	Palmd
1.61368	1.42113	E9QB02;Q68FL6;F6W0G8	E9QB02;Q68FL6	Methionine--tRNA ligase, cytoplasmic	Mars
1.67498	2.46692	Q8VI75;D6RES6;Q5U4C5	Q8VI75;D6RES6;Q5U4C5	Importin-4	Ipo4
1.31621	1.12154	Q3TL72;Q8C878	Q3TL72;Q8C878	NEDD8-activating enzyme E1 catalytic subunit	Uba3
1.37114	0.758358	Q9ERB0	Q9ERB0	Synaptosomal-associated protein 29	Snap29
1.83926	1.41067	Q3TWW8;A0A0A6YXX6	Q3TWW8	Serine/arginine-rich splicing factor 6	Srsf6
1.3047	1.22248	Q9D937;A0A087WQJ5;A0A087WRC2	Q9D937;A0A087WQJ5;A0A087WRC2		1810009A15Rik
1.5051	1.20633	P01592	P01592	Immunoglobulin J chain	Igj
1.75248	2.10974	G3XA39;D3Z3B4;E9Q7X0;Q3UXF4;Q99K73;Q9WU00;D3YV66	G3XA39;D3Z3B4;E9Q7X0;Q3UXF4;Q99K73;Q9WU00;D3YV66	Nuclear respiratory factor 1	Nrf1
1.50116	1.26739	E9PUF4;E9Q640;E9PYZ7;Q6NZN0	E9PUF4;E9Q640;E9PYZ7;Q6NZN0	RNA-binding protein 26	Rbm26
1.73424	1.25638	A0A0N4SWI4;Q9CR98	A0A0N4SWI4;Q9CR98	Protein FAM136A	Fam136a
1.39892	1.12064	P30677	P30677	Guanine nucleotide-binding protein subunit alpha-14	Gna14
1.5207	1.93364	Q60996	Q60996	Serine/threonine-protein phosphatase 2A 56 kDa regulatory subunit gamma isoform	Ppp2r5c
1.41606	2.19942	Q9CQZ1	Q9CQZ1	Heat shock factor-binding protein 1	Hsbp1
1.61272	2.99524	Q8CI61	Q8CI61	BAG family molecular chaperone regulator 4	Bag4
1.46311	1.85181	A0A171EBL2;E9Q555	A0A171EBL2;E9Q555	E3 ubiquitin-protein ligase RNF213	Rnf213
1.57568	2.45434	P60202	P60202	Myelin proteolipid protein	Plp1
2.82417	4.68761	Q9DCC7	Q9DCC7	Isochorismatase domain-containing protein 2B, mitochondrial	Isoc2b
1.59141	1.36265	E9PY51;E9PWG2	E9PY51;E9PWG2		Trappc8
1.30554	0.935761	Q91YP2	Q91YP2	Neurolysin, mitochondrial	Nln
2.18292	1.45019	D3Z512;P56542	D3Z512;P56542	Deoxyribonuclease-2-alpha	Dnase2a;Dnase2
1.92159	2.15654	P32233;D6RHA5	P32233	Developmentally-regulated GTP-binding protein 1	Drg1
1.41214	1.07632	B7ZC23;Q91W39;B7ZC24	B7ZC23;Q91W39	Nuclear receptor coactivator 5	Ncoa5
1.59177	2.08183	Q9CS42	Q9CS42	Ribose-phosphate pyrophosphokinase 2	Prps2
3.38006	1.88841	Q8BFQ4;A0A1L1SRB6	Q8BFQ4	WD repeat-containing protein 82	Wdr82
3.52121	2.23584	Q920A9;E0CX78	Q920A9;E0CX78	Fc receptor-like A	Fcrla
2.40858	1.38157	Q61152	Q61152	Tyrosine-protein phosphatase non-receptor type 18	Ptpn18
1.4245	0.603494	Q9D1D4	Q9D1D4	Transmembrane emp24 domain-containing protein 10	Tmed10
1.72747	2.27596	Q9D8I1	Q9D8I1	Marginal zone B- and B1-cell-specific protein	Mzb1
1.61472	1.09534	A0A0R4J1I6;Q9QY81;F6XGN0	A0A0R4J1I6;Q9QY81;F6XGN0	Nuclear pore membrane glycoprotein 210	Nup210
1.58858	0.700594	A0A0A6YWG3;Q9DC83;A0A1B0GS59;P19070	A0A0A6YWG3;Q9DC83;A0A1B0GS59;P19070	Complement receptor type 2	Cr2
1.43672	2.08965	A0A0R4IZX1;Q8C2K1	A0A0R4IZX1;Q8C2K1	Differentially expressed in FDCP 6	Def6
1.84854	1.18902	E9Q8B3;Q5U458;A2A8D1	E9Q8B3;Q5U458;A2A8D1	DnaJ homolog subfamily C member 11	Dnajc11
2.00018	1.34068	Q8VHC3	Q8VHC3	Selenoprotein M	Selm
1.38224	1.81381	P62077	P62077	Mitochondrial import inner membrane translocase subunit Tim8 B	Timm8b
1.30936	2.93727	E9QPI5;Q6A026	E9QPI5;Q6A026	Sister chromatid cohesion protein PDS5 homolog A	Pds5a
2.00504	1.62014	Q3USJ8	Q3USJ8	FCH and double SH3 domains protein 2	Fchsd2
2.27798	1.74394	Q5SSI6	Q5SSI6	U3 small nucleolar RNA-associated protein 18 homolog	Utp18
2.41821	2.55213	A0A0A6YY53;F6TQW2;P01864	A0A0A6YY53;F6TQW2;P01864	Ig gamma-2A chain C region secreted form	Ighg2c
1.51487	0.909278	Q8K2C9	Q8K2C9	Very-long-chain (3R)-3-hydroxyacyl-CoA dehydratase 3	ptplad1
1.36292	1.51162	Q8CAP3	Q8CAP3		Rad23a
1.36132	0.945871	E9PVN6;Q9D6K5	E9PVN6;Q9D6K5	Synaptojanin-2-binding protein	Gm20498;Synj2bp
1.74783	0.901258	Q9D104;G5E8T3;D6RHP8;Q9D7A6	Q9D104;G5E8T3		Srp19
1.34676	1.90883	Q8R1N4;A0A0A0MQL8	Q8R1N4;A0A0A0MQL8	NudC domain-containing protein 3	Nudcd3
1.43545	2.08765	A2ABY3;Q922E4	A2ABY3;Q922E4	Ethanolamine-phosphate cytidylyltransferase	Pcyt2
1.57177	1.33881	Q8VDU4;E9PXI0;P27870;Q9R0C8	Q8VDU4;E9PXI0;P27870	Proto-oncogene vav	Vav1
1.55253	0.578266	Q9EQP2	Q9EQP2	EH domain-containing protein 4	Ehd4
2.056	1.68934	A0A0B4J1I9;P04945	A0A0B4J1I9;P04945	Ig kappa chain V-VI region NQ2-6.1
1.55929	0.820591	Q921Y0;Q3UDM0;Q8BPB0	Q921Y0;Q3UDM0;Q8BPB0	MOB kinase activator 1A;MOB kinase activator 1B	Mob1a;Mob1b
1.57875	0.825602	A0A075B5P6;A0A075B6A0	A0A075B5P6;A0A075B6A0		Ighm
2.28669	1.84993	Q00420;Q3UT69	Q00420;Q3UT69	GA-binding protein subunit beta-1	Gabpb1
2.53408	0.969348	Q80U93;A0A0A6YW83	Q80U93	Nuclear pore complex protein Nup214	Nup214
1.51602	1.72815	P62748;D3Z1M0;A2A7R5;D3Z2Z8;D3YVA2;E9PV73;Q91X97;P84075	P62748	Hippocalcin-like protein 1	Hpcal1
1.559	2.00699	Q8K1X4	Q8K1X4		Nckap1l
1.50474	1.74666	A2AN08;F6SSP6;Z4YMA7	A2AN08;F6SSP6	E3 ubiquitin-protein ligase UBR4	Ubr4
1.31371	0.704225	Q8CHP5	Q8CHP5	Partner of Y14 and mago	Wibg
1.92284	0.878965	E9Q035;F7BAE9;F7CJN9;E9Q2Q7;E9Q939;CON__Q2HJF0;P47758	E9Q035		Gm20425
2.01473	1.98929	P16406;F7B9G4	P16406;F7B9G4	Glutamyl aminopeptidase	Enpep
1.34244	1.75457	Q8BH24	Q8BH24	Transmembrane 9 superfamily member 4	Tm9sf4
1.5111	0.665521	Q9ES97	Q9ES97	Reticulon-3	Rtn3
1.39423	0.554525	O35864;A0A087WQA8;A0A087WQ60;A0A087WRH6	O35864;A0A087WQA8	COP9 signalosome complex subunit 5	Cops5
1.34883	1.14463	Q9QXZ0;E9QA63;B1ARU4;E9PVY8;A0A0A0MQA6;F7ACR9;E9QNP1;F6Q750;B1ARU1;F6XCT0;F6SHS0;F6RL59;A0A0A0MQH5;F6RCJ3;F6YKN8	Q9QXZ0;E9QA63;B1ARU4;E9PVY8;A0A0A0MQA6;F7ACR9;E9QNP1;F6Q750;B1ARU1	Microtubule-actin cross-linking factor 1	Macf1
1.57932	2.39598	Q3TYJ3;D3Z0M6;O88485	Q3TYJ3;D3Z0M6;O88485	Cytoplasmic dynein 1 intermediate chain 1	Dync1i1
1.40468	1.11435	P35585;D3YZ71	P35585	AP-1 complex subunit mu-1	Ap1m1
1.46326	1.46073	A0A0R4J1B9;G3X9M0;Q9ER88	A0A0R4J1B9;G3X9M0;Q9ER88	28S ribosomal protein S29, mitochondrial	Dap3
2.08654	1.22063	D3YZ20;Q6PI63;O08740	D3YZ20;Q6PI63;O08740	DNA-directed RNA polymerase II subunit RPB11	Polr2j
1.33073	1.06619	Q8CJG0	Q8CJG0	Protein argonaute-2	Ago2
2.2335	1.57454	O35127	O35127	Protein C10	Grcc10
1.51969	1.013	Q8QZY9	Q8QZY9	Splicing factor 3B subunit 4	Sf3b4
2.02226	1.13004	Q9QUR7;Q3ULQ2	Q9QUR7	Peptidyl-prolyl cis-trans isomerase NIMA-interacting 1	Pin1
1.52078	2.93934	Q3TN85;P54726;F6YL88	Q3TN85;P54726	UV excision repair protein RAD23 homolog A	Rad23a
1.85517	0.976287	A0A075B5V1;A0A075B5V6;A0A0A6YWK5;A0A075B5V2;A0A075B5V0;P06330;A0A075B5V7;A0A075B5U4;A0A075B5U6;A0A075B5U7;A0A0A6YXN4;A0A0A6YY38;A0A0A6YXN5;A0A0A6YX66;P01757;P01756;A0A0A6YXA5;A0A0A6YVW3;A0A075B5Y4	A0A075B5V1;A0A075B5V6;A0A0A6YWK5;A0A075B5V2;A0A075B5V0;P06330;A0A075B5V7;A0A075B5U4;A0A075B5U6;A0A075B5U7;A0A0A6YXN4;A0A0A6YY38;A0A0A6YXN5;A0A0A6YX66;P01757;P01756	Ig heavy chain V region AC38 205.12;Ig heavy chain V region J558;Ig heavy chain V region MOPC 104E	Ighv1-31;Ighv1-42;Ighv1-34;Ighv1-26;Ighv1-43;Ighv1-18;Ighv1-20;Ighv1-22
1.36238	1.09768	Q9CXE7;E9PXY3;D3Z615;Q8C5H9;Q3V440;E9Q2J2	Q9CXE7;E9PXY3	Transmembrane emp24 domain-containing protein 5	Tmed5
2.65872	1.58788	F6WMJ3;Q8K4I3;A2AFJ8;H3BJ53;H3BKQ0	F6WMJ3;Q8K4I3;A2AFJ8	Rho guanine nucleotide exchange factor 6	Arhgef6
2.24103	1.06051	G5E8V9;A2RSX9;E9Q3G5;E9QAY5	G5E8V9;A2RSX9;E9Q3G5;E9QAY5		Arfip1
1.8645	1.09325	E0CYH4;Q8C6G8;F8WH48	E0CYH4;Q8C6G8	WD repeat-containing protein 26	Wdr26
1.96488	0.828231	Q9D820	Q9D820	Prolyl-tRNA synthetase associated domain-containing protein 1	Prorsd1
1.9374	0.927004	Q9CQE5;D3Z1B6;A0A0U1RPU5	Q9CQE5	Regulator of G-protein signaling 10	Rgs10
2.04981	2.39869	Q62192	Q62192	CD180 antigen	Cd180
1.51718	0.732691	A2ADY9	A2ADY9	Protein DDI1 homolog 2	Ddi2
1.50244	1.56537	P70271	P70271	PDZ and LIM domain protein 4	Pdlim4
1.70177	0.992994	Q9CR26;F6W5Q8;F8WJC2	Q9CR26;F6W5Q8	Vacuolar protein sorting-associated protein VTA1 homolog	Vta1
1.35857	0.645883	A2API8;F7AA26;O54931	A2API8;F7AA26;O54931	A-kinase anchor protein 2	Akap2;Palm2Akap2
1.42405	1.13171	Q07113	Q07113	Cation-independent mannose-6-phosphate receptor	Igf2r
1.34131	2.44242	Q9CZS1	Q9CZS1	Aldehyde dehydrogenase X, mitochondrial	Aldh1b1
1.73643	1.41487	A2AKN9;A2BIM8;P02762;P04938;A2CEK7;A9R9W0;A2CEL1;A9C497;A9C496;P11588;A2CEL0;B8JI96;A2AKN8;Q58EV3;B5X0G2;A2BIN0;L7MUC7;A2CEK6;E9QA79;E9PVW0;L7N222;A2CEK9;P11591	A2AKN9;A2BIM8;P02762;P04938;A2CEK7;A9R9W0;A2CEL1;A9C497;A9C496;P11588;A2CEL0;B8JI96;A2AKN8;Q58EV3;B5X0G2;A2BIN0;L7MUC7;A2CEK6;E9QA79;E9PVW0;L7N222	Major urinary protein 6;Major urinary proteins 11 and 8;Major urinary protein 1;Major urinary protein 17	Mup4;Mup9;Mup6;Mup8;Mup14;Mup15;Mup1;Mup19;Mup17;Mup11;Mup7;Mup13
2.514	1.20319	O55135;A6PWZ2	O55135	Eukaryotic translation initiation factor 6	Eif6
3.40701	3.91735	A0A0R4J0W6;Q9CRC8	A0A0R4J0W6;Q9CRC8	Leucine-rich repeat-containing protein 40	Lrrc40
2.58127	2.61413	E9Q6C2;Q8CG14	E9Q6C2;Q8CG14	Complement C1s-A subcomponent;Complement C1s-A subcomponent heavy chain;Complement C1s-A subcomponent light chain	C1s1;C1sa
2.53022	2.66157	P40240	P40240	CD9 antigen	Cd9
3.96416	2.12715	A0A140LHG8;Q9CYN2;A0A140LIK0;A0A140LJ01;A0A140LHW5;A0A140LJG6;A0A140LHR3	A0A140LHG8;Q9CYN2;A0A140LIK0;A0A140LJ01;A0A140LHW5;A0A140LJG6;A0A140LHR3	Signal peptidase complex subunit 2	Spcs2
2.07038	0.995402	A0A1B0GX25;Q9Z2V5	A0A1B0GX25;Q9Z2V5	Histone deacetylase 6	Hdac6
2.75168	1.04833	Q05D44	Q05D44	Eukaryotic translation initiation factor 5B	Eif5b
3.38898	3.55498	Q3UVK0;G8JL46;F6TQS9	Q3UVK0;G8JL46	Endoplasmic reticulum metallopeptidase 1	Ermp1
3.86001	3.28985	Q8BVG4	Q8BVG4	Dipeptidyl peptidase 9	Dpp9
3.73927	3.31548	Q61160	Q61160	FAS-associated death domain protein	Fadd
3.06063	2.04237	F6SUV7;E9Q6Q8;E0CX53;Q8BYJ6	F6SUV7;E9Q6Q8;E0CX53;Q8BYJ6	TBC1 domain family member 4	Tbc1d4
3.01667	1.86778	Q9DC70	Q9DC70	NADH dehydrogenase [ubiquinone] iron-sulfur protein 7, mitochondrial	Ndufs7
3.5429	1.61126	A0A0R4J0T4;Q5D0E0;O88351;Q3U141	A0A0R4J0T4;Q5D0E0;O88351	Inhibitor of nuclear factor kappa-B kinase subunit beta	Ikbkb
3.828	5.64991	A0A1I7Q4G8;E9QMN5;Q8CHY6	A0A1I7Q4G8;E9QMN5;Q8CHY6	Transcriptional repressor p66 alpha	Gatad2a
4.94718	4.46839	D3Z3Z8;D3YYI3;P60898	D3Z3Z8;D3YYI3;P60898	DNA-directed RNA polymerase subunit;DNA-directed RNA polymerase II subunit RPB9	Polr2i
3.60962	1.61572	P60670	P60670	Nuclear protein localization protein 4 homolog	Nploc4
5.11384	6.71468	P56393	P56393	Cytochrome c oxidase subunit 7B, mitochondrial	Cox7b
5.35234	4.03924	Z4YLI8;A0A0R4J140;Q5SW19	Z4YLI8;A0A0R4J140;Q5SW19	Clustered mitochondria protein homolog	Cluh
3.73508	3.04647	P97298;E9PWS2;B7ZC25;F6S1M4	P97298	Pigment epithelium-derived factor	Serpinf1
2.48783	2.14882	E9QLL2;Q8BZ98;F2Z460;E0CXZ8	E9QLL2;Q8BZ98	Dynamin-3	Dnm3
3.37132	1.22824	Q00422	Q00422	GA-binding protein alpha chain	Gabpa
2.36347	1.08839	Q91YJ2	Q91YJ2	Sorting nexin-4	Snx4
2.25426	1.91253	Q9Z0E6;E9Q2N7;Q01514	Q9Z0E6	Interferon-induced guanylate-binding protein 2	Gbp2
1.76738	2.50224	Q9D8Y7	Q9D8Y7	Tumor necrosis factor alpha-induced protein 8-like protein 2	Tnfaip8l2
2.26267	1.14593	Q9JIF7	Q9JIF7	Coatomer subunit beta	Copb1
1.59063	0.874785	Q8R1F1;A2ARS6	Q8R1F1	Niban-like protein 1	Fam129b
1.64471	0.976132	Q9WVJ2;E9Q5I9;E9Q0U1;F6ZQQ3;F6PXS6	Q9WVJ2;E9Q5I9;E9Q0U1	26S proteasome non-ATPase regulatory subunit 13	Psmd13
1.54409	1.58689	D3Z2J6;Q9D710;D3YYX0	D3Z2J6;Q9D710;D3YYX0	Thioredoxin-related transmembrane protein 2	Tmx2
1.38176	2.0275	A0A0R4J263;O35083;G3UWV6	A0A0R4J263;O35083;G3UWV6	1-acyl-sn-glycerol-3-phosphate acyltransferase alpha	Agpat1
1.53061	2.53898	E9PXY1;A2A432;J3QJX0;E9PXT5;Q3TCH7	E9PXY1;A2A432;J3QJX0;E9PXT5;Q3TCH7	Cullin-4B;Cullin-4A	Cul4b;Cul4a
1.30107	1.81753	A2AFP4;A2AFP5;Q9R0M6	A2AFP4;A2AFP5;Q9R0M6	Ras-related protein Rab-9A	Rab9;Rab9a
1.60213	3.12373	Q3TL44	Q3TL44	NLR family member X1	Nlrx1
1.83509	0.818754	Q64133	Q64133	Amine oxidase [flavin-containing] A	Maoa
2.61227	1.92491	Q8R5J9	Q8R5J9	PRA1 family protein 3	Arl6ip5
2.27238	1.42674	Q9DB27;Q9CQ21	Q9DB27;Q9CQ21	Malignant T-cell-amplified sequence 1;Malignant T-cell-amplified sequence 2	Mcts1;Mcts2
1.70607	2.49218	Q9QXK3	Q9QXK3	Coatomer subunit gamma-2	Copg2
1.56439	1.04671	E9PYT3;Q91YH5;Q8BH66	E9PYT3;Q91YH5	Atlastin-3	Atl3
1.82765	0.673914	J3QNT2;Q99PM3	J3QNT2;Q99PM3	Transcription initiation factor IIA subunit 1;Transcription initiation factor IIA alpha chain;Transcription initiation factor IIA beta chain	Gm5435;Gtf2a1
2.91691	2.66275	Q3B7Z2	Q3B7Z2	Oxysterol-binding protein 1	Osbp
2.772	1.04732	Q3TBA3;P21958;F6QHF1	Q3TBA3;P21958	Antigen peptide transporter 1	Tap1
2.96717	1.02827	E9QAZ2;Q9CZM2;B8JKK2	E9QAZ2;Q9CZM2;B8JKK2	Ribosomal protein L15;60S ribosomal protein L15	Gm10020;Rpl15
1.45365	0.739008	B2M1R6;H3BKD0;H3BKI8;Q8BT23;H3BLP7;H3BJ43;H3BJS9	B2M1R6;H3BKD0;H3BKI8		Hnrnpk
1.33448	0.412745	O54988	O54988	STE20-like serine/threonine-protein kinase	Slk
1.48575	0.980611	Q99JX7;V9GXM5;V9GXW3;V9GXF3	Q99JX7	Nuclear RNA export factor 1	Nxf1
1.5639	1.03729	A0A0G2JGQ4;P54729	A0A0G2JGQ4;P54729	NEDD8 ultimate buster 1	Nub1
1.82599	1.91501	Q8K2H4;Q8CI47	Q8K2H4	Arf-GAP with coiled-coil, ANK repeat and PH domain-containing protein 1	Acap1
2.26738	0.859556	P61166	P61166	Transmembrane protein 258	Tmem258
1.7722	0.739363	Q9D0B0;F6RTE1	Q9D0B0	Serine/arginine-rich splicing factor 9	Srsf9
2.75117	1.2101	Q922Q4;Q922W5	Q922Q4	Pyrroline-5-carboxylate reductase 2	Pycr2
2.95048	2.96462	O35130;A0A0N4SUL6	O35130;A0A0N4SUL6	Ribosomal RNA small subunit methyltransferase NEP1	Emg1
1.37272	1.43301	P17426;A0A140LIG7	P17426	AP-2 complex subunit alpha-1	Ap2a1
1.71983	2.00821	Q61586	Q61586	Glycerol-3-phosphate acyltransferase 1, mitochondrial	Gpam
2.37853	0.945441	Q8BG32;G3UYI4;G3UYL3;G3UYL8;G3UX15;G3UX67;G3UWV7;G3UYH2;G3UZ33;G3UWW7;G3UXL5;G3UZ28	Q8BG32	26S proteasome non-ATPase regulatory subunit 11	Psmd11
2.6419	1.76304	Q9DBK7	Q9DBK7		Uba7
2.12099	1.40499	A0A0R4J170;Q3TKT4;G3UX35;F2Z4A9;H3BLH0;Q6DIC0;E9QAB8;H3BJK2;A0A140LJD7;H3BJM2;A0A140LJK1;A0A140LIV3;A0A140LHZ8;H3BJI1;H3BLI4;A0A140LHE2;A0A140LIQ9;Q9D007;A0A140LI14;H3BKJ3;A0A140LIM0;A0A140LID0;H3BK47;A0A140LHP6;A0A140LHF4;H3BKN5;E9Q9V7;A0A087WQY5;A0A087WP63;A0A087WNX7;A0A087WNL7;A0A087WQ44	A0A0R4J170;Q3TKT4;G3UX35;F2Z4A9;H3BLH0;Q6DIC0;E9QAB8	Transcription activator BRG1;Probable global transcription activator SNF2L2	Smarca4;Smarca2
1.99541	1.50564	Q8CD15;D3YTU3;Q8CCK9;D3Z287	Q8CD15;D3YTU3;Q8CCK9	Bifunctional lysine-specific demethylase and histidyl-hydroxylase MINA	Mina
1.55042	2.09063	A0A0A6YW87;Q9CX13	A0A0A6YW87;Q9CX13	Protein cornichon homolog 4	Cnih4
1.31293	0.995164	P70699;F6R5R5;A2AFL3	P70699;F6R5R5;A2AFL3	Lysosomal alpha-glucosidase	Gaa
1.34637	3.02876	E9QM38;P55012;REV__A0A087WQT2;REV__Q7M6Z4	E9QM38;P55012	Solute carrier family 12 member 2	Slc12a2
1.45954	0.743974	P61327;A0A023T778;Q9CQL1;G3UZW7	P61327;A0A023T778;Q9CQL1;G3UZW7	Protein mago nashi homolog;Protein mago nashi homolog 2	Magoh;2010012C16Rik;Magohb
1.36807	1.26733	Q64697	Q64697	Protein tyrosine phosphatase receptor type C-associated protein	Ptprcap
1.38876	0.830759	Q91ZW8	Q91ZW8	CD209 antigen-like protein D	Cd209d
1.43713	0.807857	P62911;P17932	P62911	60S ribosomal protein L32	Rpl32
1.38739	1.35172	D6REF7;Q8R0X7;D3YZT4;D3YY13;D3Z1Z3	D6REF7;Q8R0X7;D3YZT4	Sphingosine-1-phosphate lyase 1	Sgpl1
1.37242	1.27079	Q8R1Q8	Q8R1Q8	Cytoplasmic dynein 1 light intermediate chain 1	Dync1li1
1.59658	0.572143	Q3U4F0;Q91V61	Q3U4F0;Q91V61	Sideroflexin-3	Sfxn3
1.37761	2.45524	O88253;E9Q1L8;A0A087WQI7;E9PUT0;F6UQD0;Q9CZ29;Q7TMC9;A0A087WPV0;Q7M6W8;B8JJY3;F6VWU8;F2Z422;F8VPP0;Q6PEP4;Q9Z117;Q6DFU8;E9PVW1;G3UVW7;Q80ZX2;Q3U4L8;B1B1D3;E9Q0Q3;J3JS23;Q07231;Q571J5;Q8C827	O88253;E9Q1L8;A0A087WQI7;E9PUT0;F6UQD0;Q9CZ29;Q7TMC9;A0A087WPV0;Q7M6W8;B8JJY3;F6VWU8;F2Z422;F8VPP0;Q6PEP4;Q9Z117;Q6DFU8;E9PVW1;G3UVW7;Q80ZX2;Q3U4L8;B1B1D3;E9Q0Q3;J3JS23;Q07231;Q571J5;Q8C827	Zinc finger and SCAN domain-containing protein 21;Zinc finger protein 354C;Zinc finger protein 62	Gm10226;Zfp493;3110052M02Rik;Zfp273;Zfp773;Zfp85;Zfp708;Zfp677;Zfp53;Zfp948;Zkscan7;Zfp40;Zfp790;Zfp51;2610021A01Rik;Zfp62;Zscan21;Znf354c
1.52116	1.08723	P60229	P60229	Eukaryotic translation initiation factor 3 subunit E	Eif3e
1.81424	1.65832	Q9CPQ8;J3QNM7	Q9CPQ8	ATP synthase subunit g, mitochondrial	Atp5l
1.42271	1.96765	Q9D7I5	Q9D7I5	Phospholysine phosphohistidine inorganic pyrophosphate phosphatase	Lhpp
1.31793	0.8225	P63028;D3YU75	P63028;D3YU75	Translationally-controlled tumor protein	Tpt1
1.83564	2.1603	O54910	O54910	NF-kappa-B inhibitor epsilon	Nfkbie
2.29796	1.40705	Q9CQI7;A2CES4	Q9CQI7;A2CES4	U2 small nuclear ribonucleoprotein B	Snrpb2
1.77714	1.12894	Q3TBT3	Q3TBT3	Stimulator of interferon genes protein	Tmem173
1.97705	0.802003	O78196;P20040;P18468;P04230;P04231;P01915	O78196;P20040;P18468;P04230;P04231	H-2 class II histocompatibility antigen, E-Q beta chain;H-2 class II histocompatibility antigen, I-A beta chain;H-2 class II histocompatibility antigen, E-B beta chain;H-2 class II histocompatibility antigen, E-S beta chain	H2-Eb1
1.84144	1.2005	Q9DCJ9	Q9DCJ9	N-acetylneuraminate lyase	Npl
1.52208	0.779832	Q3U1Z5;G3UYL4	Q3U1Z5	G-protein-signaling modulator 3	Gpsm3
1.81004	1.93012	Q9Z2L7;J3QMV5;J3QP70;J3QPM4	Q9Z2L7	Cytokine receptor-like factor 3	Crlf3
1.99674	1.83646	E0CX20;Q6PGH1	E0CX20;Q6PGH1	Protein BUD31 homolog	Bud31
1.62631	2.21644	Q9JHU9	Q9JHU9	Inositol-3-phosphate synthase 1	Isyna1
2.16928	0.870962	Q64737;D6RCG1	Q64737	Trifunctional purine biosynthetic protein adenosine-3;Phosphoribosylamine--glycine ligase;Phosphoribosylformylglycinamidine cyclo-ligase;Phosphoribosylglycinamide formyltransferase	Gart
2.2264	0.702703	P54822;E9Q242;E9Q3T7;A0A140LHU1;E9Q0A0;A0A0G2JFI8	P54822;E9Q242;E9Q3T7	Adenylosuccinate lyase	Adsl
2.36109	1.48249	F8VPX1;Q6A4J8;E9PXY8;E0CY04;G3UWR8	F8VPX1;Q6A4J8;E9PXY8	Ubiquitin carboxyl-terminal hydrolase;Ubiquitin carboxyl-terminal hydrolase 7	Usp7
1.35459	2.1129	Q60591;A2AQC8;B5B2R5;Q8C443	Q60591;A2AQC8;B5B2R5;Q8C443	Nuclear factor of activated T-cells, cytoplasmic 2	Nfatc2
1.97291	1.91338	Q925I1;H3BK90;H3BKI6;V9GWS6	Q925I1	ATPase family AAA domain-containing protein 3	Atad3
1.45932	1.22951	Q3UW53;E9PYV4;D3Z233;D3YYZ9	Q3UW53;E9PYV4	Protein Niban	Fam129a
1.63569	1.30518	Q9QYB5	Q9QYB5	Gamma-adducin	Add3
1.42525	0.796852	Q8BWY3	Q8BWY3	Eukaryotic peptide chain release factor subunit 1	Etf1
1.31983	0.887306	P97379;A0A0J9YTQ8;A0A0J9YUY8	P97379	Ras GTPase-activating protein-binding protein 2	G3bp2
1.3233	1.30556	F6RPJ9;Q9JHR7	F6RPJ9;Q9JHR7	Insulin-degrading enzyme	Ide
1.39793	1.67348	Q8R2Z5	Q8R2Z5	von Willebrand factor A domain-containing protein 1	Vwa1
1.33192	0.996737	H3BJ30;H3BJW3;Q6NVF9;H3BKW0;H3BLM9	H3BJ30;H3BJW3;Q6NVF9;H3BKW0	Cleavage and polyadenylation specificity factor subunit 6	Cpsf6
1.35978	0.647512	A0A1B0GR78;A0A1B0GRA5;P70302	A0A1B0GR78;A0A1B0GRA5;P70302	Stromal interaction molecule 1	Stim1
1.36424	2.39207	P23780;A0A1L1SSJ7	P23780;A0A1L1SSJ7	Beta-galactosidase	Glb1
1.76212	1.75281	A2AUE1;G5E8T0;P60904	A2AUE1;G5E8T0;P60904	DnaJ homolog subfamily C member 5	Dnajc5
1.48785	1.53415	Q9EQ06;A8Y5N4;Q8VCR2;REV__Q8CET2	Q9EQ06	Estradiol 17-beta-dehydrogenase 11	Hsd17b11
1.83592	1.13147	Q922Q8	Q922Q8	Leucine-rich repeat-containing protein 59	Lrrc59
1.40239	1.4238	P85094	P85094	Isochorismatase domain-containing protein 2A, mitochondrial	Isoc2a
1.30285	1.06752	E9QJW0;Q91VS7;D3YU60;A0A0N4SV17;A0A0N4SVZ0;D3YVR3	E9QJW0;Q91VS7;D3YU60	Microsomal glutathione S-transferase 1	Mgst1
2.1037	1.40063	Q99JR1	Q99JR1	Sideroflexin-1	Sfxn1
1.8435	1.27065	P59017	P59017	Bcl-2-like protein 13	Bcl2l13
1.70047	0.601471	Q9DCC4	Q9DCC4	Pyrroline-5-carboxylate reductase 3	Pycrl
1.38471	2.82145	P00416	P00416	Cytochrome c oxidase subunit 3	mt-Co3
1.58654	1.1302	P97370	P97370	Sodium/potassium-transporting ATPase subunit beta-3	Atp1b3
1.60017	0.774391	P54823	P54823	Probable ATP-dependent RNA helicase DDX6	Ddx6
1.68136	1.09316	Q99LE6	Q99LE6	ATP-binding cassette sub-family F member 2	Abcf2
1.31656	1.41552	P56960;F6VYQ6;Q8K366	P56960;F6VYQ6;Q8K366	Exosome component 10	Exosc10
2.01955	1.61986	E9QAI5;G3UWN2;B2RQC6;E9QAT6	E9QAI5;G3UWN2;B2RQC6;E9QAT6	CAD protein;Glutamine-dependent carbamoyl-phosphate synthase;Aspartate carbamoyltransferase;Dihydroorotase	Cad
2.36499	1.10661	P54923	P54923	[Protein ADP-ribosylarginine] hydrolase	Adprh
1.72752	0.91065	Q9DCF9	Q9DCF9	Translocon-associated protein subunit gamma	Ssr3
1.70415	0.826175	A0A0G2JEA2;A0A0G2JDN9;A0A1B0GXL7;A0A0G2JDM0;A0A140T8R8;A0A0G2JGV7;Q3UT23;Q9QZ73	A0A0G2JEA2;A0A0G2JDN9;A0A1B0GXL7;A0A0G2JDM0;A0A140T8R8;A0A0G2JGV7;Q3UT23;Q9QZ73	DCN1-like protein;DCN1-like protein 1	Dcun1d1
1.46572	0.777107	Q810A7	Q810A7	ATP-dependent RNA helicase DDX42	Ddx42
1.40485	1.76556	Q61881;D3Z6N3	Q61881;D3Z6N3	DNA replication licensing factor MCM7	Mcm7
2.67889	0.954837	G5E8R1;G5E8R0;E9Q455	G5E8R1;G5E8R0;E9Q455		Tpm1
2.80417	1.44504	Q61635;A0A1L1SQM2;A6PWD6;Q5NCB2;Q5SVP2;Q5SVP0;Q5NCB3	Q61635		Ifi47
2.03671	0.613333	Q3UGS4	Q3UGS4	Protein FAM195B	Fam195b
1.73236	1.51497	Q9JKY0	Q9JKY0	Cell differentiation protein RCD1 homolog	Rqcd1
1.83677	0.615318	Q6ZWN5;F7CJS8;D3YWH9;Q9CXW7;D3Z673;D3YUV6	Q6ZWN5;F7CJS8;D3YWH9;Q9CXW7	40S ribosomal protein S9	Rps9
2.15759	1.23413	P24668	P24668	Cation-dependent mannose-6-phosphate receptor	M6pr
2.11249	1.25946	Q99PV0;B7ZC27	Q99PV0	Pre-mRNA-processing-splicing factor 8	Prpf8
1.70334	0.978427	Q9JL35	Q9JL35	High mobility group nucleosome-binding domain-containing protein 5	Hmgn5
1.89355	0.885001	G5E8G0;G3X9W0	G5E8G0;G3X9W0		Hnrnpd
1.50982	2.86328	A0A075B664;P01728;A0A075B663;P01723;P01729;P01727;P01726	A0A075B664;P01728;A0A075B663;P01723;P01729;P01727;P01726	Ig lambda-2 chain V region;Ig lambda-1 chain V region;Ig lambda-2 chain V region MOPC 315;Ig lambda-1 chain V region S43;Ig lambda-1 chain V region H2020	Iglv2;Iglv1
1.3855	0.764215	P27661	P27661	Histone H2AX	H2afx
1.62351	0.796149	P54227;D3Z5N2;D3Z1Z8	P54227;D3Z5N2;D3Z1Z8	Stathmin	Stmn1
1.55132	0.545845	Q9DCG9;Q8VCR4	Q9DCG9;Q8VCR4	Multifunctional methyltransferase subunit TRM112-like protein	Trmt112
1.72662	1.10267	P97311;Q3ULG5	P97311;Q3ULG5	DNA replication licensing factor MCM6	Mcm6
1.62791	0.918755	Q8VDP4	Q8VDP4	Cell cycle and apoptosis regulator protein 2	Ccar2
1.40762	0.935003	A0A0U1RQA1;P42209;D3Z3V3;D3YVG1;A0A0U1RPA8	A0A0U1RQA1;P42209;D3Z3V3;D3YVG1;A0A0U1RPA8	Septin-1	Sept1
1.42565	1.08298	Q62189;D3Z0S6;F8VQ88;D6RI83	Q62189;D3Z0S6;F8VQ88	U1 small nuclear ribonucleoprotein A	Snrpa;Gm5145
1.30393	0.533525	Q62419;A2ALV1;Q8BXU5;A2ALV3;Q62420	Q62419	Endophilin-A2	Sh3gl1
1.3798	0.814961	P24369	P24369	Peptidyl-prolyl cis-trans isomerase B	Ppib
1.39967	1.22998	Q9CSH3	Q9CSH3	Exosome complex exonuclease RRP44	Dis3
1.36318	0.947503	A0A0R4J0B2;Q8VCI0;A0A0N4SV60	A0A0R4J0B2;Q8VCI0	Phospholipase B-like 1;Phospholipase B-like 1 chain A;Phospholipase B-like 1 chain B;Phospholipase B-like 1 chain C	Plbd1
1.35581	0.825402	Q8K4Z3	Q8K4Z3	NAD(P)H-hydrate epimerase	Apoa1bp
1.79084	0.482985	H3BIW0;G3X8T2;Q0P678;H3BJJ9	H3BIW0;G3X8T2;Q0P678;H3BJJ9	Zinc finger CCCH domain-containing protein 18	Zc3h18
1.58879	0.745176	F8WHU5;Q4VA53	F8WHU5;Q4VA53	Sister chromatid cohesion protein PDS5 homolog B	Pds5b
1.60102	0.930129	F6RJ39;Q9JIX8;B8JJ91;Q52KR6;B8JJ92;B8JJ90;F6Q8C0	F6RJ39;Q9JIX8;B8JJ91;Q52KR6;B8JJ92	Apoptotic chromatin condensation inducer in the nucleus	Acin1
1.81502	1.22426	O70200;G3UYJ2	O70200;G3UYJ2	Allograft inflammatory factor 1	Aif1
1.87126	0.856999	Q9JL26;A2AB60;G3UWI1;E9PXE6;F8VPR2;A2APV2;F6XR20;D3Z7A7;Q6ZPF4	Q9JL26;A2AB60	Formin-like protein 1	Fmnl1
1.48085	2.05703	Q8BHA3	Q8BHA3	Probable D-tyrosyl-tRNA(Tyr) deacylase 2	Dtd2
1.60494	0.858061	Q02013	Q02013	Aquaporin-1	Aqp1
1.72832	0.848388	O35350	O35350	Calpain-1 catalytic subunit	Capn1
1.32548	0.477433	Q9WV55	Q9WV55	Vesicle-associated membrane protein-associated protein A	Vapa
1.63087	0.748655	Q3U1J4	Q3U1J4	DNA damage-binding protein 1	Ddb1
1.34692	0.848487	Q9JHU4;F6ZX84	Q9JHU4	Cytoplasmic dynein 1 heavy chain 1	Dync1h1
1.46453	0.763987	P47955;E9Q3T0	P47955;E9Q3T0	60S acidic ribosomal protein P1	Rplp1;Gm10073
1.37159	0.872599	P97855	P97855	Ras GTPase-activating protein-binding protein 1	G3bp1
1.50569	1.33134	L7N451;Q80SU7	L7N451;Q80SU7	Interferon-induced very large GTPase 1	Gvin1
1.58973	2.11312	P27046;F6QMB7	P27046	Alpha-mannosidase 2	Man2a1
1.45869	0.638094	A0A0R4J0R1;O70404;A0A0U1RPE8	A0A0R4J0R1;O70404;A0A0U1RPE8	Vesicle-associated membrane protein 8	Vamp8
1.71102	0.811961	P35821	P35821	Tyrosine-protein phosphatase non-receptor type 1	Ptpn1
1.32813	0.393276	Q5SW88;Q5SW87;Q5SW86	Q5SW88;Q5SW87;Q5SW86		Rab1
1.55672	1.93753	Q80UP5;F7B209;Q6PD24	Q80UP5;F7B209;Q6PD24	Ankyrin repeat domain-containing protein 13A;Ankyrin repeat domain-containing protein 13D	Ankrd13a;Ankrd13d
1.55185	1.01815	Q3UDS7;A0A1L1SSF2;Q8VDL4	Q3UDS7;A0A1L1SSF2;Q8VDL4	ADP-dependent glucokinase	Adpgk
1.59099	0.513811	P47968	P47968	Ribose-5-phosphate isomerase	Rpia
1.31272	0.853051	P35282	P35282	Ras-related protein Rab-21	Rab21
1.63109	1.11377	A2A839;A2A838;A2A841;P48193;A2A842;A2AD32;F7BUB8;F6S4K9;A0A1D5RLV1;F7CR30	A2A839;A2A838;A2A841;P48193;A2A842;A2AD32;F7BUB8;F6S4K9	Protein 4.1	Epb4.1;Epb41
1.31966	0.81868	Q8BG48	Q8BG48	Serine/threonine-protein kinase 17B	Stk17b
1.32196	0.84901	B1AV77;B1ATI0;P47740;A0A140LJF9	B1AV77;B1ATI0;P47740	Aldehyde dehydrogenase;Fatty aldehyde dehydrogenase	Aldh3a2
1.34753	1.20775	Q8JZV7;F6UP77;F7CUP3	Q8JZV7	Putative N-acetylglucosamine-6-phosphate deacetylase	Amdhd2
1.49484	1.16661	E9PUD2;Q8K1M6	E9PUD2;Q8K1M6	Dynamin-1-like protein	Dnm1l
1.68833	1.04803	Q8BG07	Q8BG07	Phospholipase D4	Pld4
1.41516	1.88494	P62342	P62342	Selenoprotein T	Selt
1.31004	0.835983	H3BLJ6;Q921N6	H3BLJ6;Q921N6	Probable ATP-dependent RNA helicase DDX27	Ddx27
1.40124	0.798535	Q5XJF6;P53026;D6RE43	Q5XJF6;P53026	Ribosomal protein;60S ribosomal protein L10a	Rpl10a
1.45457	0.818526	O35955	O35955	Proteasome subunit beta type-10	Psmb10
1.4303	0.621309	Q9DCU6;A0A1L1SRY8;A0A1L1SSY9;A0A1L1SU24;A0A1L1STN5;A0A1L1SV70	Q9DCU6;A0A1L1SRY8;A0A1L1SSY9;A0A1L1SU24;A0A1L1STN5	39S ribosomal protein L4, mitochondrial	Mrpl4
1.44673	1.06468	A0A0G2JGY5;E9QME5;E9QP19;Q99PP7	A0A0G2JGY5;E9QME5;E9QP19;Q99PP7	E3 ubiquitin-protein ligase TRIM33	Trim33
1.3253	0.813579	Q9JHJ0;A0A1L1SQ12;A0A1L1SR42	Q9JHJ0	Tropomodulin-3	Tmod3
1.33749	1.0854	A0A0R4J0V5;P08775	A0A0R4J0V5;P08775	DNA-directed RNA polymerase II subunit RPB1	Polr2a
1.31624	0.596714	P43277	P43277	Histone H1.3	Hist1h1d
1.38553	0.716513	Q9QZQ8	Q9QZQ8	Core histone macro-H2A.1	H2afy
1.6879	1.20744	O35344	O35344	Importin subunit alpha-4	Kpna3
1.89544	1.08011	Q9CQW9;A0A1B0GT68;Q99J93	Q9CQW9	Interferon-induced transmembrane protein 3	Ifitm3
1.86786	0.53229	Q8BGX0	Q8BGX0	E3 ubiquitin-protein ligase TRIM23	Trim23
2.37667	1.83018	A0A1L1SRC3;Q9CQT2	A0A1L1SRC3;Q9CQT2	RNA-binding protein 7	Rbm7
2.14195	0.796717	Q9Z1T1	Q9Z1T1	AP-3 complex subunit beta-1	Ap3b1
2.63487	1.19214	Q8BH40;O70439	Q8BH40;O70439	Syntaxin-7	Stx7
2.65875	1.41096	P18608;D3Z607	P18608;D3Z607	Non-histone chromosomal protein HMG-14	Hmgn1
2.45387	2.44719	A0A0R4J190;Q64277;A0A0G2JG11	A0A0R4J190;Q64277	ADP-ribosyl cyclase/cyclic ADP-ribose hydrolase 2	Bst1
1.57669	0.868858	P84096;A0A1B0GSL4;G3UZM2;D3Z3L1;F2Z463;D3YX61;Q8R527;Q9ER71	P84096	Rho-related GTP-binding protein RhoG	Rhog
1.61603	0.92751	Q60749;Q9WU01;Q9R226	Q60749	KH domain-containing, RNA-binding, signal transduction-associated protein 1	Khdrbs1
1.34726	0.872477	D0QMC3;A0A087WRA4;A0A087WQG9;A0A087WSH9	D0QMC3;A0A087WRA4	Myeloid cell nuclear differentiation antigen-like protein	Mndal
1.31673	0.70476	P32921	P32921	Tryptophan--tRNA ligase, cytoplasmic;T1-TrpRS;T2-TrpRS	Wars
1.3327	1.51368	Q8C570;A2ASC6	Q8C570;A2ASC6	mRNA export factor	Rae1
1.40874	0.767509	Q62426	Q62426	Cystatin-B	Cstb
1.30889	0.723633	D3Z1H9;Q9JL62;D3Z1H8	D3Z1H9;Q9JL62;D3Z1H8	Glycolipid transfer protein	Gltp
1.62889	1.78237	Q91ZR1;P56371	Q91ZR1	Ras-related protein Rab-4B	Rab4b
1.32166	0.74376	Q9R1T4;A2A3W1	Q9R1T4	Septin-6	Sept6
1.44346	0.965204	Q5SUA5;Q5SYD0	Q5SUA5	Unconventional myosin-Ig	Myo1g
1.35142	0.685241	P60710;E9Q1F2;E9Q5F4;E9Q2D1	P60710;E9Q1F2;E9Q5F4	Actin, cytoplasmic 1;Actin, cytoplasmic 1, N-terminally processed	Actb
1.51911	1.11823	E9QAS4;E9QAS5;Q6PDQ2;E9PYU4;E9PYL1;A2A8L1;F7C528;E9Q614;B1AR17;F6WR45	E9QAS4;E9QAS5;Q6PDQ2	Chromodomain-helicase-DNA-binding protein 4	Chd4
1.69879	1.08276	Q9JI11;A2A5M9;Q9JI10;Q8CDG4;F7BYZ4	Q9JI11	Serine/threonine-protein kinase 4;Serine/threonine-protein kinase 4 37kDa subunit;Serine/threonine-protein kinase 4 18kDa subunit	Stk4
1.62929	0.858356	Q921M7	Q921M7	Protein FAM49B	Fam49b
1.76735	0.888362	Q99MN1	Q99MN1	Lysine--tRNA ligase	Kars
1.67545	0.910795	Q9QUI0;A0A0A6YXF6;Q62159;H3BL56;A0A0G2JEP8;Q9CR99;A0A0A6YWJ1	Q9QUI0;A0A0A6YXF6;Q62159;H3BL56	Transforming protein RhoA;Rho-related GTP-binding protein RhoC	Rhoa;Rhoc
1.54151	1.33558	F8WHL2;Q8CIE6;F6XJN3	F8WHL2;Q8CIE6	Coatomer subunit alpha;Coatomer subunit alpha;Xenin;Proxenin	Copa
1.32297	0.757904	Q9Z1Q9;G3UY93;G3UZ22;G3UYW2;G3UZX1	Q9Z1Q9;G3UY93	Valine--tRNA ligase	Vars
1.37593	1.1637	A2AH85;O08810;G3UZ34;G3UXK8	A2AH85;O08810;G3UZ34	116 kDa U5 small nuclear ribonucleoprotein component	Eftud2
1.46749	0.961377	Q5SVP4;Q62293;Q3T9E4	Q5SVP4;Q62293;Q3T9E4		Tgtp1;Ifggb5
1.71563	0.822302	A0A075B5P2;P01837	A0A075B5P2;P01837	Ig kappa chain C region	Igkc
1.95916	1.24528	Q9CQF7;Q9CWM4	Q9CQF7;Q9CWM4	Prefoldin subunit 1	Pfdn1
1.43018	0.850137	Q6ZWQ5;Q3TGS7;Q3V2H3;O70493	Q6ZWQ5;Q3TGS7;Q3V2H3;O70493	Sorting nexin-12	Snx12
1.45266	0.93996	Q9JI48	Q9JI48	Placenta-specific gene 8 protein	Plac8
1.37574	0.799455	Q9ESX5;B7ZCL7;F6YUI5;A2AN81;F6S1S5	Q9ESX5;B7ZCL7	H/ACA ribonucleoprotein complex subunit 4	Dkc1
1.47188	1.56842	P61924	P61924	Coatomer subunit zeta-1	Copz1
1.52698	0.673306	Q8JZX4	Q8JZX4	Splicing factor 45	Rbm17
1.64038	0.713821	P46467;Q8BPY9	P46467	Vacuolar protein sorting-associated protein 4B	Vps4b
1.49527	2.13565	Q6A0D4;D3Z731	Q6A0D4	Raftlin	Rftn1
1.50197	0.73305	Q31621;P28078	Q31621;P28078	Class II histocompatibility antigen, M alpha chain	H2-DMa
1.36818	1.10842	Q3UKJ7	Q3UKJ7	WD40 repeat-containing protein SMU1;WD40 repeat-containing protein SMU1, N-terminally processed	Smu1
1.3081	0.69578	Q9D154;Z4YK03;Q8VHP7;Q5SV42;A0A0R4J1T5	Q9D154;Z4YK03	Leukocyte elastase inhibitor A	Serpinb1a
1.40684	0.817191	Q9D554	Q9D554	Splicing factor 3A subunit 3	Sf3a3
1.62929	1.51227	A0A0A0MQ68;Q60759;D3Z4I2	A0A0A0MQ68;Q60759	Glutaryl-CoA dehydrogenase, mitochondrial	Gcdh
1.57521	0.943504	Q9D379;E9PWK1;F6YTS6;D3Z4M3	Q9D379;E9PWK1	Epoxide hydrolase 1	Ephx1
1.4102	2.3813	Q61093;E9Q7S3;E9Q802	Q61093	Cytochrome b-245 heavy chain	Cybb
1.46334	0.619438	Q7TQE2;Q62523;A0A0N4SVD2;A0A0N4SUX7;A0A0N4SVP4	Q7TQE2;Q62523	Zyxin	Zyx
1.54942	0.706574	O88796	O88796	Ribonuclease P protein subunit p30	Rpp30
1.32149	0.733984	Q9JKF1;A0A0U1RNG5;A0A0U1RPU3;A0A0U1RPI2;Q3UQP1;F8VQ29	Q9JKF1	Ras GTPase-activating-like protein IQGAP1	Iqgap1
1.62508	0.898351	Q3U9G9;A0A0A6YXT6;A0A0A6YW01;A0A0A6YXW3;A0A0A6YWS3;A0A0A6YY12	Q3U9G9;A0A0A6YXT6;A0A0A6YW01	Lamin-B receptor	Lbr
1.66973	0.860509	S4R1M0;S4R2V1;S4R1S4;P06800;A0A0A6YXM4	S4R1M0;S4R2V1;S4R1S4;P06800	Receptor-type tyrosine-protein phosphatase C	Ptprc
1.81914	0.925506	P59999;Q3TX55;E9PWA7	P59999	Actin-related protein 2/3 complex subunit 4	Arpc4
1.45148	0.63753	Q99K48;B1AXT0	Q99K48	Non-POU domain-containing octamer-binding protein	Nono
1.4499	0.7092	Q61029	Q61029	Lamina-associated polypeptide 2, isoforms beta/delta/epsilon/gamma	Tmpo
1.36462	0.571648	Q8R1B4;M0QWV3	Q8R1B4	Eukaryotic translation initiation factor 3 subunit C	Eif3c
1.3624	0.706019	Q9D0E1;B8JK33;B8JK32;F6W322;F7C9U3	Q9D0E1;B8JK33;B8JK32	Heterogeneous nuclear ribonucleoprotein M	Hnrnpm
1.61892	0.945936	A0A1L1SUX8;P01831	A0A1L1SUX8;P01831	Thy-1 membrane glycoprotein	Thy1
1.52041	0.803921	Q99J36	Q99J36	THUMP domain-containing protein 1	Thumpd1
1.45707	0.635216	D3Z6I8;E9Q7Q3	D3Z6I8;E9Q7Q3		Tpm3
1.55076	0.839218	Q8C3V4;A0A087WSP5;P42225;Q99K94;Q8CFQ1;A0A087WRI1;A0A087WSQ5	Q8C3V4;A0A087WSP5;P42225;Q99K94	Signal transducer and activator of transcription;Signal transducer and activator of transcription 1	Stat1
1.57716	0.979545	Q9CPP0	Q9CPP0	Nucleoplasmin-3	Npm3
1.72469	0.851551	Q542I8;P11835;M0QWA7;D3YYP8;D3Z1S4;M0QWJ6	Q542I8;P11835;M0QWA7	Integrin beta;Integrin beta-2	Itgb2
2.02923	1.11747	P61202;A2AQE4	P61202;A2AQE4	COP9 signalosome complex subunit 2	Cops2
2.18105	0.937328	E9Q5C9	E9Q5C9		Nolc1
2.04798	2.41961	P36916	P36916	Guanine nucleotide-binding protein-like 1	Gnl1
2.06969	0.799272	Q05144	Q05144	Ras-related C3 botulinum toxin substrate 2	Rac2
1.86799	0.997596	Q8K1B8	Q8K1B8	Fermitin family homolog 3	Fermt3
1.48306	0.816926	G3UVV4;P17710;D3YYR4;D3Z365;D3Z105	G3UVV4;P17710	Hexokinase-1	Hk1
1.46157	0.927261	P83917;Q7TPM0;Q9CYJ8;REV__Q8BHB9	P83917;Q7TPM0;Q9CYJ8	Chromobox protein homolog 1	Cbx1
2.27432	2.76676	G3XA75;G3XA66;D3Z3F4;F7C846;P47802;G3UYJ5;D3YVW0;G3UXB5;G3UXX9	G3XA75;G3XA66;D3Z3F4;F7C846;P47802;G3UYJ5;D3YVW0	Metaxin-1	Mtx1
1.73603	2.70914	Q02248;E9Q6A9;F7BAC9;F7CRC6;F6QZ47;D3YUH4	Q02248;E9Q6A9	Catenin beta-1	Ctnnb1
1.60625	0.756286	Q91ZW3;Q6PGB8;F6Z6F4;Q8BS67	Q91ZW3	SWI/SNF-related matrix-associated actin-dependent regulator of chromatin subfamily A member 5	Smarca5
1.52734	0.746731	P10852;A0A0U1RPK4;A0A0U1RP98;A0A0U1RPL8;A0A0U1RPG5;A0A0U1RP32	P10852;A0A0U1RPK4	4F2 cell-surface antigen heavy chain	Slc3a2
1.55236	2.12139	Q8BI72;A0A1I7Q4A1	Q8BI72	CDKN2A-interacting protein	Cdkn2aip
1.31239	0.873868	Q922H4;A0A087WPV7;D3Z2L8;D3YVK2;D3Z2T0;D3Z5Z5;D3Z0T7	Q922H4	Mannose-1-phosphate guanyltransferase alpha	Gmppa
1.33346	0.64491	Q8BTZ7	Q8BTZ7	Mannose-1-phosphate guanyltransferase beta	Gmppb
1.98587	1.05828	Q3V3R4	Q3V3R4	Integrin alpha-1	Itga1
1.63667	2.04092	Q5F2D9;Q91YI4;J3QNV6	Q5F2D9;Q91YI4	Beta-arrestin-2	Arrb2
1.34334	2.29524	D3Z0B9;A0A1B0GSU0;Q571I9;A0A1B0GSN3	D3Z0B9;A0A1B0GSU0;Q571I9	Aldehyde dehydrogenase family 16 member A1	Aldh16a1
1.51618	1.43481	Q8JZR0	Q8JZR0	Long-chain-fatty-acid--CoA ligase 5	Acsl5
1.97272	3.14281	P70445	P70445	Eukaryotic translation initiation factor 4E-binding protein 2	Eif4ebp2
1.96772	2.30861	E9PZ92;Q3TPX4;E0CYX2	E9PZ92;Q3TPX4;E0CYX2	Exocyst complex component 5	Exoc5
2.18551	2.92963	Q9D8T7;F8WHU8;F7DE82	Q9D8T7;F8WHU8	SRA stem-loop-interacting RNA-binding protein, mitochondrial	Slirp
1.91915	1.10822	Q3ULB1;Q921W7;P47226;D6RH72;A2ALC6;B1AXB9	Q3ULB1;Q921W7;P47226	Testin	Tes
2.30911	0.744912	P19253;A0A1B0GTA1;A0A1B0GS68;A0A1B0GSQ6;A0A1B0GQW6;A0A1B0GSC2;A0A1B0GSF0;A0A1B0GSB2;A0A140T8K2;A0A1B0GRH1;A0A1B0GT00;A0A1B0GSJ2;A0A1B0GSL5;REV__A2A8E7;REV__P52825	P19253;A0A1B0GTA1;A0A1B0GS68;A0A1B0GSQ6;A0A1B0GQW6;A0A1B0GSC2;A0A1B0GSF0;A0A1B0GSB2;A0A140T8K2	60S ribosomal protein L13a	Rpl13a
1.91168	1.26862	Q9EQH2	Q9EQH2	Endoplasmic reticulum aminopeptidase 1	Erap1
1.38271	1.98832	Q8C147;A0A0U1RNK7;E9PX48;A2A9M5;A2A9M4;Q8R1A4	Q8C147	Dedicator of cytokinesis protein 8	Dock8
1.37781	1.29758	Q9D8C4;D6RFB1	Q9D8C4	Interferon-induced 35 kDa protein homolog	Ifi35
1.32369	1.24051	Q3UEB3	Q3UEB3	Poly(U)-binding-splicing factor PUF60	Puf60
1.50595	1.18232	Q9QZE5;Q7TNQ1	Q9QZE5	Coatomer subunit gamma-1	Copg1
1.58386	1.20683	A2AMQ5;Q99L43;Q6PBC0;F6S4G2	A2AMQ5;Q99L43;Q6PBC0;F6S4G2	Phosphatidate cytidylyltransferase;Phosphatidate cytidylyltransferase 2	Cds2

## Sheet: liver
-Log Student's t-test p-value Passive_Active	Student's t-test Difference Passive_Active	Protein IDs	Majority protein IDs	Protein names	Gene names
1.63619	-0.169232	Q9D0M5;D6RIN4;Q80ZS7;P63168	Q9D0M5;D6RIN4	Dynein light chain 2, cytoplasmic	Dynll2
1.61535	-1.95515	Q8R519	Q8R519	2-amino-3-carboxymuconate-6-semialdehyde decarboxylase	Acmsd
1.63448	-0.805925	Q8C5W0	Q8C5W0	Calmin	Clmn
1.38317	-2.07523	E9Q5Q0;Q3TGG2;A0A0U1RPL0;Q7TQH0	E9Q5Q0;Q3TGG2;A0A0U1RPL0;Q7TQH0	Ataxin-2-like protein	Atxn2l
1.5018	-0.983479	Q62165	Q62165	Dystroglycan;Alpha-dystroglycan;Beta-dystroglycan	Dag1
1.48647	-0.721331	D3YVW2;Q8BXA1;F6RUD1	D3YVW2;Q8BXA1	Golgi integral membrane protein 4	Golim4
1.70465	-1.32359	Q9Z1Q5	Q9Z1Q5	Chloride intracellular channel protein 1	Clic1
2.10166	-0.237318	P05201;F7ALS6	P05201	Aspartate aminotransferase, cytoplasmic	Got1
1.96316	-1.09123	G3UXL2;Q9D7G0	G3UXL2;Q9D7G0	Ribose-phosphate pyrophosphokinase 1	Prps1l3;Prps1
1.55971	-0.504126	Q8BGY7	Q8BGY7	Protein FAM210A	Fam210a
1.75707	-0.359918	Q9DCM0	Q9DCM0	Persulfide dioxygenase ETHE1, mitochondrial	Ethe1
1.31899	-1.56978	Q8BH43;B1AUN0	Q8BH43	Wiskott-Aldrich syndrome protein family member 2	Wasf2
1.45629	-0.325839	P54071;D6RIL6;A0A0U1RP68;A0A0U1RPR1	P54071	Isocitrate dehydrogenase [NADP], mitochondrial	Idh2
1.5689	-0.224676	P97450;E9QAD6	P97450;E9QAD6	ATP synthase-coupling factor 6, mitochondrial	Atp5j
1.86767	-0.320828	Q9CZS1;G3UYH1;G3UWP3;Q9JHW9;A0A140LIF9	Q9CZS1	Aldehyde dehydrogenase X, mitochondrial	Aldh1b1
1.80183	-0.580626	O70475;D3YXP9	O70475	UDP-glucose 6-dehydrogenase	Ugdh
1.3739	-0.403739	Q8BGA8;A0A140LHR8;Q6P8J0	Q8BGA8;A0A140LHR8	Acyl-coenzyme A synthetase ACSM5, mitochondrial	Acsm5
1.55314	-0.276975	F8VPN4;A0A0G2JGI9;F6XXE6;E0CYU6;E0CX86;F7CSZ6;REV__D3YUZ7;REV__Q569E4	F8VPN4;A0A0G2JGI9;F6XXE6		Agl
1.66846	-0.327693	Q9WV98	Q9WV98	Mitochondrial import inner membrane translocase subunit Tim9	Timm9
2.19528	-0.62686	P19639	P19639	Glutathione S-transferase Mu 3	Gstm3
1.44376	-0.358292	Q9CPQ8;J3QNM7	Q9CPQ8	ATP synthase subunit g, mitochondrial	Atp5l
1.30103	-0.301297	P10649;A2AE89	P10649;A2AE89	Glutathione S-transferase Mu 1	Gstm1
2.0402	-0.976111	O08759;A0A0J9YUK0;A0A0J9YUY4	O08759;A0A0J9YUK0	Ubiquitin-protein ligase E3A	Ube3a
2.24098	-1.05452	O08738	O08738	Caspase-6;Caspase-6 subunit p18;Caspase-6 subunit p11	Casp6
1.63726	-0.310266	Q8BKZ9;A2AWH8;A2AWH7	Q8BKZ9	Pyruvate dehydrogenase protein X component, mitochondrial	Pdhx
2.6592	-0.521254	O88533;Q5SUV9	O88533	Aromatic-L-amino-acid decarboxylase	Ddc
1.72392	-0.446441	G3X9Y6	G3X9Y6		Akr1c19
2.27765	-0.849277	Q5RKN9;P47753;A0A0G2JE27	Q5RKN9;P47753	F-actin-capping protein subunit alpha-1	Capza1
1.76367	-0.979065	P63321	P63321	Ras-related protein Ral-A	Rala
1.5769	-3.23267	Q921K2;P11103;A0A0A6YY63	Q921K2;P11103	Poly [ADP-ribose] polymerase 1	Parp1
2.2898	-1.18065	Q6ZWQ5;Q3TGS7;Q3V2H3;O70493	Q6ZWQ5;Q3TGS7;Q3V2H3;O70493	Sorting nexin-12	Snx12
1.76522	-0.959367	D3Z136;Q8BHI7;D3Z0Z6	D3Z136;Q8BHI7;D3Z0Z6	Elongation of very long chain fatty acids protein;Elongation of very long chain fatty acids protein 5	Elovl5
1.78912	-1.59782	Q3UE37	Q3UE37	Ubiquitin-conjugating enzyme E2 Z	Ube2z
1.69059	-0.286423	Q9WUR9;F6TEU8;A2ARF6;A2ARF5	Q9WUR9;F6TEU8	Adenylate kinase 4, mitochondrial	Ak4
1.50899	-1.29323	Q9CQK7	Q9CQK7	RWD domain-containing protein 1	Rwdd1
1.64192	-0.0947332	P49429;D3Z1U3;F6X9Z6	P49429	4-hydroxyphenylpyruvate dioxygenase	Hpd
1.80237	-0.409988	O09172;A0A0G2JDI4;H3BJA3;F6VNW5	O09172;A0A0G2JDI4;H3BJA3	Glutamate--cysteine ligase regulatory subunit	Gclm
1.64326	-0.280673	P00329;Q8BZ47	P00329	Alcohol dehydrogenase 1	Adh1
1.58038	-0.272036	A2AMS3;Q03249;A2AMS2	A2AMS3;Q03249;A2AMS2	Galactose-1-phosphate uridylyltransferase	Galt
1.56663	-0.27294	Q99K67;F6VMP2	Q99K67	Alpha-aminoadipic semialdehyde synthase, mitochondrial;Lysine ketoglutarate reductase;Saccharopine dehydrogenase	Aass
1.37783	-0.71701	Q9Z2D6	Q9Z2D6	Methyl-CpG-binding protein 2	Mecp2
1.49781	-1.06251	D3YYT1;Q922P9	D3YYT1;Q922P9	Putative oxidoreductase GLYR1	Glyr1
1.52018	-0.821096	A2AFQ0;Q7TMY8;F6XP90	A2AFQ0;Q7TMY8	E3 ubiquitin-protein ligase HUWE1	Huwe1
1.31396	-0.796292	Q64437	Q64437	Alcohol dehydrogenase class 4 mu/sigma chain	Adh7
1.32234	-0.498789	Q8BMS4	Q8BMS4	Hexaprenyldihydroxybenzoate methyltransferase, mitochondrial	Coq3
1.32209	-0.647148	Q62465	Q62465	Synaptic vesicle membrane protein VAT-1 homolog	Vat1
1.41484	-0.983626	Q91VA6;F6SQH7	Q91VA6;F6SQH7	Polymerase delta-interacting protein 2	Poldip2
2.25027	-1.80083	P51125;Q8CE80	P51125;Q8CE80	Calpastatin	Cast
1.89157	-0.368417	P52503	P52503	NADH dehydrogenase [ubiquinone] iron-sulfur protein 6, mitochondrial	Ndufs6
1.69283	-0.352353	P45591	P45591	Cofilin-2	Cfl2
1.44973	-0.975694	E9Q456;E9Q453;S4R261	E9Q456;E9Q453		Tpm1
1.37802	-1.08633	Q924M7;F6Q3K8	Q924M7	Mannose-6-phosphate isomerase	Mpi
2.8442	-0.419941	Q8CGV4	Q8CGV4		Rdh1
4.4265	-0.332803	P35492;F8WH73	P35492	Histidine ammonia-lyase	Hal
1.40962	-0.570901	Q8R5F7	Q8R5F7	Interferon-induced helicase C domain-containing protein 1	Ifih1
1.5768	-0.329584	Q71RI9;A0A0G2JGE1;D6RJ70	Q71RI9	Kynurenine--oxoglutarate transaminase 3	Ccbl2
1.70412	-0.767612	P05063	P05063	Fructose-bisphosphate aldolase C	Aldoc
1.36955	-0.737901	P13745;D3Z6A6;D3YZV3	P13745;D3Z6A6;D3YZV3	Glutathione S-transferase A1;Glutathione S-transferase A1, N-terminally processed;Glutathione S-transferase	Gsta1;Gsta2
1.44639	-0.139086	E9QNL5;D3Z3G5	E9QNL5;D3Z3G5	Sulfotransferase	Sult1a1
1.37909	-1.43029	Q91YS8	Q91YS8	Calcium/calmodulin-dependent protein kinase type 1	Camk1
1.4263	-0.403214	P28650;J3QN31	P28650;J3QN31	Adenylosuccinate synthetase isozyme 1	Adssl1
1.42607	-1.00372	Q9CYS6	Q9CYS6	Uncharacterized protein C2orf72 homolog
2.15735	-0.759461	Q9CWD8;F7D3P0	Q9CWD8;F7D3P0	Iron-sulfur protein NUBPL	Nubpl
1.95594	-0.727922	Q9R092	Q9R092	17-beta-hydroxysteroid dehydrogenase type 6	Hsd17b6
1.53234	-0.550535	Q8BWU8;E9PYH3	Q8BWU8;E9PYH3	Ethanolamine-phosphate phospho-lyase	Etnppl
1.36381	-0.253853	P40936	P40936	Indolethylamine N-methyltransferase	Inmt
1.42607	-1.59262	Q99L27;Q9DCZ1	Q99L27	GMP reductase 2	Gmpr2
2.00351	-0.196489	Q9CPY7;A0A0G2JEM7	Q9CPY7	Cytosol aminopeptidase	Lap3
1.72323	-0.324031	Q9JLI8	Q9JLI8	Squamous cell carcinoma antigen recognized by T-cells 3	Sart3
1.70005	-0.556074	Q61133	Q61133	Glutathione S-transferase theta-2	Gstt2
2.40039	-0.610262	P03930	P03930	ATP synthase protein 8	Mtatp8
2.49654	-2.63837	Q9DB25	Q9DB25	Dolichyl-phosphate beta-glucosyltransferase	Alg5
2.30724	-0.746917	P31938	P31938	Dual specificity mitogen-activated protein kinase kinase 1	Map2k1
1.74494	-0.571362	O08914	O08914	Fatty-acid amide hydrolase 1	Faah
2.60548	-0.320834	P25688;A0A0G2JG44;D3Z4U1;A0A0G2JFT6	P25688;A0A0G2JG44;D3Z4U1	Uricase	Uox
3.80415	-0.408161	O88986;E9PWY6	O88986;E9PWY6	2-amino-3-ketobutyrate coenzyme A ligase, mitochondrial	Gcat
2.46231	-0.357569	O35423;E0CXY9;Q5F247;Q9D7H4;Q8CI12	O35423	Serine--pyruvate aminotransferase, mitochondrial	Agxt
2.35305	-0.680624	H7BWY6;Q00724	H7BWY6;Q00724	Retinol-binding protein 4	Rbp4
1.70764	-0.594334	P97478;A0A140LIF0;Q3TYT1	P97478;A0A140LIF0;Q3TYT1	Ubiquinone biosynthesis protein COQ7 homolog	Coq7
1.85269	-0.388809	A0A0N4SV89;Q5XKN4	A0A0N4SV89;Q5XKN4	Protein jagunal homolog 1	Jagn1
1.47187	-0.473371	Q91YW3	Q91YW3	DnaJ homolog subfamily C member 3	Dnajc3
1.39482	-1.3375	E9PXB0;Q8K1N1;F7B2N8;E9QAC9	E9PXB0;Q8K1N1;F7B2N8;E9QAC9	Calcium-independent phospholipase A2-gamma	Pnpla8
1.32115	-1.55833	A0A0B4J1E2;Q9CSN1	A0A0B4J1E2;Q9CSN1	SNW domain-containing protein 1	Snw1
1.33861	0.421803	Q00PI9	Q00PI9	Heterogeneous nuclear ribonucleoprotein U-like protein 2	Hnrnpul2
1.58368	0.744981	Q9QXS1;E9Q3W4;F6R059;A0A0R4J218;A0A0R4J223;E9Q9J6;A0A0R4J221;E9PW24;REV__E9Q3K0	Q9QXS1;E9Q3W4	Plectin	Plec
1.91016	0.879864	Q6ZWM4;A0A0N4SUZ3	Q6ZWM4;A0A0N4SUZ3	U6 snRNA-associated Sm-like protein LSm8	Lsm8
1.58039	0.886562	Q9ET26;S4R1Z0	Q9ET26	E3 ubiquitin-protein ligase RNF114	Rnf114
1.59972	1.22345	Q7TT50	Q7TT50	Serine/threonine-protein kinase MRCK beta	Cdc42bpb
1.77788	0.372923	P62814;Q91YH6;A0A0U1RNU9	P62814;Q91YH6	V-type proton ATPase subunit B, brain isoform	Atp6v1b2;Atp6v1b1
2.12385	0.624919	O09110;A0A0R4J1Q6;A2AGS2;P70236	O09110;A0A0R4J1Q6	Dual specificity mitogen-activated protein kinase kinase 3	Map2k3
1.76498	0.416663	Q9DCX8	Q9DCX8	Iodotyrosine dehalogenase 1	Iyd
1.98636	1.32173	G3UWR2;G3UYG6;Q6Y7W8;E9Q2M5;G3UYR9	G3UWR2;G3UYG6;Q6Y7W8;E9Q2M5;G3UYR9	PERQ amino acid-rich with GYF domain-containing protein 2	Gigyf2
3.01677	0.424729	Q9D7I5;A0A1B0GR73	Q9D7I5	Phospholysine phosphohistidine inorganic pyrophosphate phosphatase	Lhpp
2.73987	1.8273	D3Z780;Q61749;A0A0J9YUY0;A0A0J9YTQ7;F7CPG6	D3Z780;Q61749;A0A0J9YUY0	Translation initiation factor eIF-2B subunit delta	Eif2b4
1.71298	0.247279	Q9DCT2	Q9DCT2	NADH dehydrogenase [ubiquinone] iron-sulfur protein 3, mitochondrial	Ndufs3
1.31113	2.49999	E9Q6R7	E9Q6R7		Utrn
1.36056	0.45635	P52480;A0A1L1SSN6;A0A1L1STV8;A0A1L1SQV8;A0A1L1SU37;A0A1L1SUV0;A0A1L1ST52;A0A1L1SVH2	P52480	Pyruvate kinase PKM	Pkm
1.3201	0.900161	A0A140LIS8;A0A140LIU7;A0A140LJ41;A0A140LJG4	A0A140LIS8;A0A140LIU7;A0A140LJ41;A0A140LJG4
1.71994	0.596414	Q9QWG7	Q9QWG7	Sulfotransferase family cytosolic 1B member 1	Sult1b1
2.89447	2.25954	G5E8T3;Q9D104;Q9D7A6	G5E8T3;Q9D104		Srp19
2.19476	0.55478	Q04750;Q8R4U6	Q04750	DNA topoisomerase 1	Top1
1.4116	1.62531	A2AQU8;Q9D975	A2AQU8;Q9D975	Sulfiredoxin;Sulfiredoxin-1	Srxn1
1.79143	0.489177	Q8K1B8	Q8K1B8	Fermitin family homolog 3	Fermt3
1.37775	1.25164	F8WIE5;Q69ZR2	F8WIE5;Q69ZR2	E3 ubiquitin-protein ligase HECTD1	Hectd1
1.44586	0.958452	A2A5R8;Q9DBE7;A2A5S3;Q9Z108;V9GX87	A2A5R8;Q9DBE7;A2A5S3;Q9Z108;V9GX87	Double-stranded RNA-binding protein Staufen homolog 1	Stau1
2.3543	0.360295	Q9Z2X1;J3QM80;J3QMT0;J3QP45;J3QNH2;J3QMV8	Q9Z2X1;J3QM80;J3QMT0	Heterogeneous nuclear ribonucleoprotein F;Heterogeneous nuclear ribonucleoprotein F, N-terminally processed	Hnrnpf
1.64307	0.950803	Q9CPT3	Q9CPT3	N-acylneuraminate-9-phosphatase	Nanp
2.01834	0.53471	Q9EQC1;D3Z3X1;D3Z3X2;A0A0U1RP28;D3YU71;A0A0U1RNL4;A0A0U1RQA2;D3YVB8	Q9EQC1;D3Z3X1;D3Z3X2	3 beta-hydroxysteroid dehydrogenase type 7	Hsd3b7
1.83065	0.639729	D3Z2C4	D3Z2C4		Pklr
1.82639	0.414932	Q8VDW0;D6RHT5	Q8VDW0	ATP-dependent RNA helicase DDX39A	Ddx39a
1.60369	0.713277	B1AT92;Q60631;B1AT95	B1AT92;Q60631	Growth factor receptor-bound protein 2	Grb2
1.34106	0.281358	Q9D9V3;E0CXS3	Q9D9V3;E0CXS3	Ethylmalonyl-CoA decarboxylase	Echdc1
1.62107	0.35808	Q8BWP5;A2AIT6;A8Y5N9;A8Y5P0;REV__F6Q7Q7;REV__Q7TQF2	Q8BWP5;A2AIT6;A8Y5N9	Alpha-tocopherol transfer protein	Ttpa
1.38363	0.596939	Q9Z0R9	Q9Z0R9	Fatty acid desaturase 2	Fads2
1.90475	0.263333	P97742;Q924X2	P97742	Carnitine O-palmitoyltransferase 1, liver isoform	Cpt1a
2.15152	0.421882	P22599	P22599	Alpha-1-antitrypsin 1-2	Serpina1b
1.49079	0.188677	P32020;A2APS4;A2APS5	P32020	Non-specific lipid-transfer protein	Scp2
1.33967	0.54336	Q9CQH3;D3Z568;D3YX99;F6Y6V5;D3Z6W9	Q9CQH3;D3Z568;D3YX99;F6Y6V5;D3Z6W9	NADH dehydrogenase [ubiquinone] 1 beta subcomplex subunit 5, mitochondrial	Ndufb5
1.94106	0.206906	E9PWY9;Q8C0C7;D6RIJ2	E9PWY9;Q8C0C7	Phenylalanine--tRNA ligase alpha subunit	Farsa
3.18074	0.26475	Q05421;A0A1B0GSV7;Q0PGA1	Q05421;A0A1B0GSV7;Q0PGA1	Cytochrome P450 2E1	Cyp2e1
1.87131	0.231622	P36552	P36552	Oxygen-dependent coproporphyrinogen-III oxidase, mitochondrial	Cpox
1.82536	0.340303	P00375	P00375	Dihydrofolate reductase	Dhfr
2.78915	0.26894	P14148;F6XI62;F7CGG2;E9PZA7;E9QLK7;E9PWT1;A0A1D5RLL4;Q80YV3	P14148;F6XI62	60S ribosomal protein L7	Rpl7
3.48576	2.21734	G3X956;Q920B9	G3X956;Q920B9	FACT complex subunit SPT16	Supt16;Supt16h
4.29377	1.0034	Q8R0J2;Q9R0Q9;E9PVP3;Q5F2B1;F6XX36;F6ZGG4	Q8R0J2;Q9R0Q9;E9PVP3;Q5F2B1;F6XX36	Mannose-P-dolichol utilization defect 1 protein	Mpdu1
2.86554	1.70322	A2BIM8;P02762;P04938;A2AKN9;A2CEK7;A2CEL1;A9C497;A9C496;P11588;A9R9W0;A2CEL0;A2AKN8;Q58EV3;E9QA79;E9PVW0;B5X0G2;A2CEK6;L7MUC7;L7N222;A2BIN0;P11591;A2CEK9;A2AV72	A2BIM8;P02762;P04938;A2AKN9;A2CEK7;A2CEL1;A9C497;A9C496;P11588;A9R9W0;A2CEL0;A2AKN8;Q58EV3;E9QA79;E9PVW0;B5X0G2;A2CEK6;L7MUC7;L7N222;A2BIN0	Major urinary protein 6;Major urinary proteins 11 and 8;Major urinary protein 1;Major urinary protein 17	Mup9;Mup6;Mup8;Mup4;Mup14;Mup1;Mup19;Mup15;Mup7;Mup17;Mup13;Mup11
1.69605	1.03603	Q3UP75;H3BLE9	Q3UP75	UDP-glucuronosyltransferase 3A1	Ugt3a1
1.74172	0.618821	A0A0R4J1V1;Q75N73;D3Z354;D3YXD7;D3Z6P5	A0A0R4J1V1;Q75N73;D3Z354;D3YXD7;D3Z6P5	Zinc transporter ZIP14	Slc39a14
1.46595	0.356905	Q9CQJ6;E9Q0G1	Q9CQJ6;E9Q0G1	Density-regulated protein	Denr
1.89016	1.28193	P14483	P14483	H-2 class II histocompatibility antigen, A beta chain	H2-Ab1
1.56633	0.230824	Q9Z2I0;A0A0J9YTQ9	Q9Z2I0	LETM1 and EF-hand domain-containing protein 1, mitochondrial	Letm1
1.33588	0.728227	B1AQ57;Q64446;A2AG68;Q64430	B1AQ57;Q64446;A2AG68;Q64430	Copper-transporting ATPase 2;Copper-transporting ATPase 1	Atp7b;Atp7a
2.06342	1.24933	A2BIN1;Q4FZE8	A2BIN1;Q4FZE8		Mup10;Mup1
2.0948	0.741189	Q3UID0;Q6PDG5	Q3UID0;Q6PDG5	SWI/SNF complex subunit SMARCC2	Smarcc2
2.3189	3.67026	E9Q5J9;D3YVR0;Q8BFU3	E9Q5J9		Tpm3
1.66207	1.45104	Q61239	Q61239	Protein farnesyltransferase/geranylgeranyltransferase type-1 subunit alpha	Fnta
1.92925	0.354744	P63037;B1AXY1;B1AXY0;B1AXX9;D3Z1U5	P63037;B1AXY1;B1AXY0	DnaJ homolog subfamily A member 1	Dnaja1
1.68757	0.374583	P55050	P55050	Fatty acid-binding protein, intestinal	Fabp2
2.45107	0.822573	S4R2B0;B2RY56	S4R2B0;B2RY56	RNA-binding protein 25	Rbm25
1.59073	0.312154	A2A839;A2A838;A2A841;P48193;A2A842;A2AD32;A0A1D5RLV1;F6S4K9;F7BUB8;F7CR30	A2A839;A2A838;A2A841;P48193;A2A842;A2AD32;A0A1D5RLV1	Protein 4.1	Epb4.1;Epb41
1.38442	1.0219	Q6TCG2	Q6TCG2	Progestin and adipoQ receptor family member 9	Paqr9
1.34316	0.406775	D5MCW4;Q9CQ89	D5MCW4;Q9CQ89	Protein CutA	Cuta
1.34568	0.278252	A0A0R4J0X5;A0A0A0MQA3;P07758	A0A0R4J0X5;A0A0A0MQA3;P07758	Alpha-1-antitrypsin 1-1	Serpina1a
1.9252	0.527534	P10833;A0A1B0GRG1;A0A1B0GRT5	P10833	Ras-related protein R-Ras	Rras
1.49094	0.368671	A3KGL9;F6W687;P09602;Q5XK38;J3QM43;B7ZCQ3;E9Q2Z4	A3KGL9;F6W687;P09602;Q5XK38;J3QM43;B7ZCQ3;E9Q2Z4	Non-histone chromosomal protein HMG-17	Hmgn2;Gm6594;Gm16494
1.95884	0.66795	Q9R0A0	Q9R0A0	Peroxisomal membrane protein PEX14	Pex14
1.94425	0.380801	Q5U5V2	Q5U5V2	Hydroxylysine kinase	Hykk
1.97731	0.416025	F6TVP2;E9Q0K6;E9PYG9;F8WJE0;Q60710;E0CXZ5	F6TVP2;E9Q0K6;E9PYG9;F8WJE0;Q60710	Deoxynucleoside triphosphate triphosphohydrolase SAMHD1	Samhd1
1.74322	0.33188	A0JNY3;Q8BUV3	A0JNY3;Q8BUV3	Gephyrin;Molybdopterin adenylyltransferase;Molybdopterin molybdenumtransferase	Gphn
1.59917	1.66411	Q62293;Q3T9E4;Q5SVP4	Q62293;Q3T9E4;Q5SVP4		Ifggb5;Tgtp1
1.88619	0.635778	A0A0R4J256;P28076;G3UYK5	A0A0R4J256;P28076	Proteasome subunit beta type-9	Psmb9
2.10179	0.78123	Q6P2B1	Q6P2B1	Transportin-3	Tnpo3
1.66383	0.344003	Q6GQT9	Q6GQT9	Nodal modulator 1	Nomo1
1.41597	0.224905	Q9R1P1;D3YUM8	Q9R1P1	Proteasome subunit beta type-3	Psmb3
1.42244	0.555859	Q64521;A2AQR0	Q64521;A2AQR0	Glycerol-3-phosphate dehydrogenase, mitochondrial	Gpd2
1.63264	0.309648	Q62446	Q62446	Peptidyl-prolyl cis-trans isomerase FKBP3	Fkbp3
1.99081	0.292953	P62082;F6SVV1	P62082;F6SVV1	40S ribosomal protein S7	Rps7;Gm9493
1.50914	0.403333	A0A1B0GT26;O55003	A0A1B0GT26;O55003	BCL2/adenovirus E1B 19 kDa protein-interacting protein 3	Bnip3
1.64544	0.303364	Q8BJW6;D3YZZ6	Q8BJW6	Eukaryotic translation initiation factor 2A;Eukaryotic translation initiation factor 2A, N-terminally processed	Eif2a
2.07945	0.405865	Q9QZ85	Q9QZ85	Interferon-inducible GTPase 1	Iigp1
1.56892	0.956643	Q7TSV4;A0A0G2JG04	Q7TSV4	Phosphoglucomutase-2	Pgm2
1.90233	0.98968	Q3V460	Q3V460		Gm561
1.79568	0.774822	Q61635;A0A1L1SQM2;A6PWD6;Q5NCB2;Q5SVP2;Q5SVP0;Q5NCB3	Q61635		Ifi47
1.57908	0.180145	P15864	P15864	Histone H1.2	Hist1h1c
1.75516	0.63058	Q99K94;Q8C3V4;A0A087WSP5;P42225;A0A087WSQ5;A0A087WRI1;Q8CFQ1	Q99K94;Q8C3V4;A0A087WSP5;P42225	Signal transducer and activator of transcription;Signal transducer and activator of transcription 1	Stat1
1.34883	1.01475	Q921W2;P70318;A0A0U1RPE1;A0A0U1RPD3;Q8CII5;D3Z3Y4;G5E8L2;Q80ZW7;D3Z4H6;P52912;A0A0N4SVR8;A0A0N4SW78;A0A0U1RP00;A0A0N4SUX1;D6RGU1;D3YY02	Q921W2;P70318;A0A0U1RPE1;A0A0U1RPD3;Q8CII5;D3Z3Y4;G5E8L2;Q80ZW7;D3Z4H6;P52912	Nucleolysin TIAR;Nucleolysin TIA-1	Tial1;Tia1
1.82995	1.38898	P56393	P56393	Cytochrome c oxidase subunit 7B, mitochondrial	Cox7b
1.48091	0.885246	E9QPE7;O08638	E9QPE7;O08638	Myosin-11	Myh11
1.87673	0.438869	P52792;F6V339;D6RFA3;E9Q3Z4;E9Q8S8;Q3TRM8	P52792	Glucokinase	Gck
1.45609	1.58688	B1AWT2;B1AWT3;Q99K70;Q7TT45;B1AWT4	B1AWT2;B1AWT3;Q99K70;Q7TT45;B1AWT4	Ras-related GTP-binding protein C;Ras-related GTP-binding protein D	Rragd;Rragc
1.67801	0.230612	Q8BGT5;D6RFQ8	Q8BGT5	Alanine aminotransferase 2	Gpt2
1.38255	1.2177	P27786	P27786	Steroid 17-alpha-hydroxylase/17,20 lyase	Cyp17a1
1.53578	0.490618	Q9DAT5	Q9DAT5	Mitochondrial tRNA-specific 2-thiouridylase 1	Trmu
2.36531	2.22404	Q9Z0E6	Q9Z0E6	Interferon-induced guanylate-binding protein 2	Gbp2
1.74599	1.0627	S4R1M2;D3YXK2;S4R2Q5;D6RJ78;D6RHP9;B1AR51	S4R1M2;D3YXK2	Scaffold attachment factor B1	Safb
1.33967	0.758907	A0A0J9YV56;E9Q0U3;D3Z7P0;Q8K3W0;E9Q8Q1	A0A0J9YV56;E9Q0U3;D3Z7P0;Q8K3W0;E9Q8Q1	BRCA1-A complex subunit BRE	Bre
1.91536	2.61916	A0A075B5P4;A0A0A6YWR2;P01868;P01869	A0A075B5P4;A0A0A6YWR2;P01868;P01869	Ig gamma-1 chain C region secreted form;Ig gamma-1 chain C region, membrane-bound form	Ighg1

## Sheet: muscle
-Log Student's t-test p-value Active_Passive	Student's t-test Difference Active_Passive	Protein IDs	Majority protein IDs	Protein names	Gene names
1.34599	-2.09625	Q8BJS4;E0CY39	Q8BJS4	SUN domain-containing protein 2	Sun2
2.02334	-0.468573	G3UYV7;P62858;J3QNN8	G3UYV7;P62858;J3QNN8	40S ribosomal protein S28	Rps28;Gm10263
1.44089	0.27168	P68033	P68033	Actin, alpha cardiac muscle 1	Actc1
1.91369	0.69303	H3BJP2;H3BLJ9;H3BJL6;H3BKH6;Q9R0P3;H3BK43;H3BJC6;H3BL99	H3BJP2;H3BLJ9;H3BJL6;H3BKH6;Q9R0P3;H3BK43	S-formylglutathione hydrolase	Esd
1.3975	1.06245	Q8R4N0	Q8R4N0	Citrate lyase subunit beta-like protein, mitochondrial	Clybl
1.7029	1.38684	Q8R164	Q8R164	Valacyclovir hydrolase	Bphl
1.45297	0.212438	P16858;A0A0A0MQF6;A0A1D5RLD8;S4R257;S4R1N5;V9GX06;V9GXA7;A0A0R4J0X7;S4R2G5;Q64467;REV__Q9Z2B5;REV__E9QQ30	P16858;A0A0A0MQF6;A0A1D5RLD8;S4R257	Glyceraldehyde-3-phosphate dehydrogenase	Gapdh
1.35156	1.063	Q91ZA3;D3YWM4;H3BL62	Q91ZA3;D3YWM4	Propionyl-CoA carboxylase alpha chain, mitochondrial	Pcca
1.35718	0.465961	Q91VA7;V9GXV0	Q91VA7		Idh3b
1.72584	1.18877	Q9WTX5	Q9WTX5	S-phase kinase-associated protein 1	Skp1
1.62546	1.33388	Q0VGP9;A2AVV5;A2AVV7;A2AVV6;Q64691;E9Q4T8;Q9JLV5	Q0VGP9;A2AVV5;A2AVV7;A2AVV6;Q64691	Calpain-3	Capn3
1.79046	0.489635	Q5XJF6;P53026;D6RE43	Q5XJF6;P53026	Ribosomal protein;60S ribosomal protein L10a	Rpl10a
1.7561	1.58238	Q8QZR5	Q8QZR5	Alanine aminotransferase 1	Gpt
2.06378	0.500945	Q6PF96;Q921G7	Q6PF96;Q921G7	Electron transfer flavoprotein-ubiquinone oxidoreductase, mitochondrial	Etfdh
1.74147	2.18377	A0A0U1RPI1;Q9Z239	A0A0U1RPI1;Q9Z239	Phospholemman	Fxyd1
1.65021	0.37385	O88207;Q61245	O88207;Q61245	Collagen alpha-1(V) chain;Collagen alpha-1(XI) chain	Col5a1;Col11a1
1.33077	1.2581	G3UY93;Q9Z1Q9;G3UYW2;G3UZ22	G3UY93;Q9Z1Q9	Valine--tRNA ligase	Vars
1.45926	0.445498	Q9R1P4;A0A1B0GS70	Q9R1P4;A0A1B0GS70	Proteasome subunit alpha type-1	Psma1
2.48367	0.565789	P08122;B1AVK5	P08122	Collagen alpha-2(IV) chain;Canstatin	Col4a2
2.03434	0.655381	Q8K1Z0;F6SFF5;A0A1D5RLE9	Q8K1Z0;F6SFF5	Ubiquinone biosynthesis protein COQ9, mitochondrial	Coq9
1.55764	0.660402	Q9R062;K3W4S6;V9GX26	Q9R062;K3W4S6;V9GX26	Glycogenin-1	Gyg1;Gyg
1.78952	0.88991	Q9CQM5	Q9CQM5	Thioredoxin domain-containing protein 17	Txndc17
1.5939	0.481189	P80317;Q61390;B1AT05	P80317	T-complex protein 1 subunit zeta	Cct6a
1.67292	1.62204	Q9D832	Q9D832	DnaJ homolog subfamily B member 4	Dnajb4
1.68712	0.998068	P15089	P15089	Mast cell carboxypeptidase A	Cpa3
2.514	0.606358	A2A6I3	A2A6I3		Tnnt3
1.70966	2.26126	Q9CQZ5	Q9CQZ5	NADH dehydrogenase [ubiquinone] 1 alpha subcomplex subunit 6	Ndufa6
1.33189	2.1456	Q9DCM2	Q9DCM2	Glutathione S-transferase kappa 1	Gstk1
1.42391	0.568913	Q8BH78;Q8BHF5;Q99P72	Q8BH78;Q8BHF5;Q99P72	Reticulon;Reticulon-4	Rtn4
1.72244	1.59314	Q99MN1;Q8R2P8	Q99MN1;Q8R2P8	Lysine--tRNA ligase	Kars
1.96936	2.18606	Q7TSQ8;D6RD07;D3Z443	Q7TSQ8;D6RD07	Pyruvate dehydrogenase phosphatase regulatory subunit, mitochondrial	Pdpr
1.31379	0.772449	P60843;A2AFK7;E9PV04;A0A0N4SVP8;Q91VC3;D6RJ60;D6RJ11;A0A0N4SVM5	P60843	Eukaryotic initiation factor 4A-I	Eif4a1
1.59964	0.509957	Q9CQ62	Q9CQ62	2,4-dienoyl-CoA reductase, mitochondrial	Decr1
2.33836	0.592895	Q91ZJ5	Q91ZJ5	UTP--glucose-1-phosphate uridylyltransferase	Ugp2
1.49161	1.43261	P08752;Q9DC51;B2RSH2;A0A0A6YWA9	P08752;Q9DC51;B2RSH2	Guanine nucleotide-binding protein G(i) subunit alpha-2;Guanine nucleotide-binding protein G(k) subunit alpha;Guanine nucleotide-binding protein G(i) subunit alpha-1	Gnai2;Gnai3;Gnai1
1.43142	1.21543	Q3TXS7;J3QN38	Q3TXS7	26S proteasome non-ATPase regulatory subunit 1	Psmd1
1.48342	0.597133	P52825;A2A8E7;A2A8E8	P52825	Carnitine O-palmitoyltransferase 2, mitochondrial	Cpt2
1.4286	0.493852	Q9CQQ7;A0A0G2JGX3	Q9CQQ7;A0A0G2JGX3	ATP synthase F(0) complex subunit B1, mitochondrial	Atp5f1
2.48977	1.25295	Q9DC70	Q9DC70	NADH dehydrogenase [ubiquinone] iron-sulfur protein 7, mitochondrial	Ndufs7
1.37776	0.467832	A2AP58	A2AP58		Sptbn5
1.35426	1.20412	Q9DAV9	Q9DAV9	Trimeric intracellular cation channel type B	Tmem38b
1.36621	0.940337	Q922Y1	Q922Y1	UBX domain-containing protein 1	Ubxn1
1.45394	0.519431	A2AKD7;Q61234	A2AKD7;Q61234	Alpha-1-syntrophin	Snta1
1.88808	0.459394	Q60930;G3UX26;D3YZT5;D3YUN8	Q60930;G3UX26;D3YZT5	Voltage-dependent anion-selective channel protein 2	Vdac2
1.53599	0.99753	Q9DC77	Q9DC77	Small muscular protein	Smpx
1.67295	0.660417	Q6ZQ73	Q6ZQ73	Cullin-associated NEDD8-dissociated protein 2	Cand2
1.44692	0.511226	P28654;REV__Q91VC4;REV__G3X924	P28654	Decorin	Dcn
1.64234	1.13261	Q8BKC5	Q8BKC5	Importin-5	Ipo5
1.65543	0.43304	G5E895;D3Z494;P45377;S4R2G9;P21300	G5E895;D3Z494;P45377	Aldose reductase-related protein 2	Akr1b10;Akr1b8
1.47724	0.622509	P62855	P62855	40S ribosomal protein S26	Rps26
1.46955	0.836597	Q6ZWZ4;A0A140T8K6;P47964;D3YX71	Q6ZWZ4;A0A140T8K6;P47964	60S ribosomal protein L36	Rpl36
1.90435	2.41567	P40124;B1ARS0	P40124;B1ARS0	Adenylyl cyclase-associated protein 1;Adenylyl cyclase-associated protein	Cap1
1.52035	1.96655	F7CDT0;F6WMC0;P61082	F7CDT0;F6WMC0;P61082	NEDD8-conjugating enzyme Ubc12	Ube2m
1.75285	0.836369	Q9D1G1	Q9D1G1	Ras-related protein Rab-1B	Rab1b
1.41816	1.15125	A0A0G2JGL7;Q3TET3;O35639	A0A0G2JGL7;Q3TET3;O35639	Annexin;Annexin A3	Anxa3
1.75601	0.953462	A0A0A0MQC7;A2A5Y6;P10637;B1AQW4	A0A0A0MQC7;A2A5Y6;P10637	Microtubule-associated protein;Microtubule-associated protein tau	Mapt
1.47166	0.629868	O09110;A0A0R4J1Q6	O09110	Dual specificity mitogen-activated protein kinase kinase 3	Map2k3
1.47004	0.375877	Q99MR9	Q99MR9	Protein phosphatase 1 regulatory subunit 3A	Ppp1r3a
1.56767	0.549441	Q9CQ92;G3X9U9;D3YZ32	Q9CQ92;G3X9U9	Mitochondrial fission 1 protein	Fis1
1.56198	0.662192	Q561M1;Q9D358;REV__P48320	Q561M1;Q9D358	Low molecular weight phosphotyrosine protein phosphatase	Acp1
1.31854	0.354375	Q60675;A0A087WRP2;F8VQ40;P19137	Q60675	Laminin subunit alpha-2	Lama2
1.48652	0.56388	Q60932	Q60932	Voltage-dependent anion-selective channel protein 1	Vdac1
2.05942	0.39048	Q9CQA3	Q9CQA3	Succinate dehydrogenase [ubiquinone] iron-sulfur subunit, mitochondrial	Sdhb
1.60818	0.482074	Q9CR62;Q5SX46;Q5SX48	Q9CR62;Q5SX46	Mitochondrial 2-oxoglutarate/malate carrier protein	Slc25a11
2.4516	0.484072	P61027;Q3TYH2;Q9DD03;P61028;P55258;Q8K386	P61027	Ras-related protein Rab-10	Rab10
3.14347	0.626117	P56382	P56382	ATP synthase subunit epsilon, mitochondrial	Atp5e
2.99275	0.8729	O35350	O35350	Calpain-1 catalytic subunit	Capn1
1.86732	0.477179	P99029;G3UZJ4;H3BJQ7	P99029;G3UZJ4;H3BJQ7	Peroxiredoxin-5, mitochondrial	Prdx5
1.39884	0.500799	Q8QZT1	Q8QZT1	Acetyl-CoA acetyltransferase, mitochondrial	Acat1
1.39068	0.365031	Q99KI0	Q99KI0	Aconitate hydratase, mitochondrial	Aco2
1.72776	0.639783	A0A1B0GSX6;O70209	A0A1B0GSX6;O70209	PDZ and LIM domain protein 3	Pdlim3
2.09069	0.866944	Q9D0K2;Q3UJQ9	Q9D0K2;Q3UJQ9	Succinyl-CoA:3-ketoacid coenzyme A transferase 1, mitochondrial;Succinyl-CoA:3-ketoacid-coenzyme A transferase	Oxct1
1.61622	0.638532	Q6P8J7;P30275;B0R0F0;A2ARP5	Q6P8J7	Creatine kinase S-type, mitochondrial	Ckmt2
1.6389	0.620882	Q9CQR4	Q9CQR4	Acyl-coenzyme A thioesterase 13;Acyl-coenzyme A thioesterase 13, N-terminally processed	Acot13
1.49474	0.363254	P00405	P00405	Cytochrome c oxidase subunit 2	Mtco2
1.70687	0.852819	O08528;E9Q5B5;E9Q9M6;G3UVV4;P17710;Q91W97;D3YYR4;D3Z365	O08528;E9Q5B5	Hexokinase-2	Hk2
1.33317	0.733802	Q0VBD2	Q0VBD2	Protein MCM10 homolog	Mcm10
1.47683	0.436022	Q9DB20;F6XVM5;F7D3P8	Q9DB20	ATP synthase subunit O, mitochondrial	Atp5o
1.33184	0.580989	G5E902;Q8VEM8;E9PX16	G5E902;Q8VEM8	Phosphate carrier protein, mitochondrial	Slc25a3
1.43458	0.462132	Q6GT24;O08709;D3Z0Y2;Q8BG37;A0A0A6YXQ7	Q6GT24;O08709;D3Z0Y2	Peroxiredoxin-6	Prdx6
1.51014	0.52088	E9Q616;G5E8K8	E9Q616		Ahnak
1.38921	0.635787	J3QP56;P97823;D3Z111;J3QQ63;D3Z269;D3YUG4	J3QP56;P97823;D3Z111	Acyl-protein thioesterase 1	Lypla1
1.5366	0.880191	E9QAZ2;Q9CZM2;B8JKK2	E9QAZ2;Q9CZM2	Ribosomal protein L15;60S ribosomal protein L15	Gm10020;Rpl15
1.41219	0.934568	O55234	O55234	Proteasome subunit beta type-5	Psmb5
1.34432	0.569127	A0A140T8L5;J3QMG5;P25444;D3YVC1;F6YTZ4;D3YWJ3;E9Q1N8;D3Z536	A0A140T8L5;J3QMG5;P25444;D3YVC1;F6YTZ4;D3YWJ3;E9Q1N8;D3Z536	40S ribosomal protein S2	Gm5786;Rps2;Gm6576;Gm18025;Gm8225
2.8032	0.515861	P62827;Q14AA6;Q61820	P62827;Q14AA6	GTP-binding nuclear protein Ran	Ran;1700009N14Rik
1.61065	0.825857	Q63918	Q63918	Serum deprivation-response protein	Sdpr
1.47563	0.429766	P42125	P42125	Enoyl-CoA delta isomerase 1, mitochondrial	Eci1
2.16603	0.771125	Q9CPQ1;D3Z6E1	Q9CPQ1	Cytochrome c oxidase subunit 6C	Cox6c
1.70564	0.471171	D3Z442;D3YZD8;Q8R0P4;D3Z1Q3;D3YWY5;D3YX09;Q8CF11;D3YY39	D3Z442;D3YZD8;Q8R0P4;D3Z1Q3;D3YWY5	Mth938 domain-containing protein	Aamdc
2.23124	1.05241	B9EHK9;Q9QY80	B9EHK9;Q9QY80	Very-long-chain (3R)-3-hydroxyacyl-CoA dehydratase 1	Ptpla
2.2066	1.19256	Q9D880	Q9D880	Mitochondrial import inner membrane translocase subunit TIM50	Timm50
1.35888	1.29387	Q3TCD4;Q9WUR2;E9PYC6;E9Q858;E9PUY9;E9PYA9;E9PVM6;E9Q7A8;E9PY42;Q78JN3	Q3TCD4;Q9WUR2;E9PYC6;E9Q858;E9PUY9;E9PYA9;E9PVM6	Enoyl-CoA delta isomerase 2, mitochondrial	Eci2
1.33566	0.611413	O88342;A0A0J9YU05	O88342	WD repeat-containing protein 1	Wdr1
1.36795	0.245277	P13542;Q8BGE8	P13542	Myosin-8	Myh8
1.72502	1.183	Q8K4Z3	Q8K4Z3	NAD(P)H-hydrate epimerase	Apoa1bp
1.87198	0.826189	Q9QUM9;E0CXB1	Q9QUM9;E0CXB1	Proteasome subunit alpha type-6	Psma6
1.31085	0.463483	P61089;A0A087WPV1;Q9CQ37	P61089	Ubiquitin-conjugating enzyme E2 N	Ube2n
1.41849	0.769793	Q8VDM4;E9Q2S8	Q8VDM4	26S proteasome non-ATPase regulatory subunit 2	Psmd2
1.358	0.569342	Q8K3J1	Q8K3J1	NADH dehydrogenase [ubiquinone] iron-sulfur protein 8, mitochondrial	Ndufs8
1.33409	0.563743	P14131	P14131	40S ribosomal protein S16	Rps16
2.37077	0.905551	Q9D881;P19536;F7C106;A0A0A6YVR0	Q9D881;P19536	Cytochrome c oxidase subunit 5B, mitochondrial	Cox5b
2.13264	0.592236	P13412;A2A6J8;A2A6K0	P13412;A2A6J8;A2A6K0	Troponin I, fast skeletal muscle	Tnni2
1.62111	0.543966	G3X8R0;Q60870	G3X8R0;Q60870	Receptor expression-enhancing protein 5	Reep5
1.4819	0.407408	Q922B1	Q922B1	O-acetyl-ADP-ribose deacetylase MACROD1	Macrod1
1.46164	0.916667	E9Q2H8;E9PYA3;A0A0R4J052;G5E8T9;Q99KB8;D3YWI0	E9Q2H8;E9PYA3;A0A0R4J052;G5E8T9;Q99KB8	Hydroxyacylglutathione hydrolase, mitochondrial	Hagh
1.87776	0.979858	P62892	P62892	60S ribosomal protein L39	Rpl39
2.16777	0.82756	Q9DCZ1;F6VY18;Q99L27	Q9DCZ1;F6VY18	GMP reductase 1	Gmpr
1.64331	0.378532	P70402	P70402	Myosin-binding protein H	Mybph
1.3295	0.587438	Q80UY1	Q80UY1	UPF0586 protein C9orf41 homolog
1.5956	0.392973	B0QZL1	B0QZL1	Enolase	Eno1
1.30763	0.278679	Q5XKE0;A0A140LI70;Q3TF37	Q5XKE0	Myosin-binding protein C, fast-type	Mybpc2
1.99691	0.609162	P48758;A0A1B0GRG8;Q8K354	P48758	Carbonyl reductase [NADPH] 1	Cbr1
1.41224	0.341324	P17182;Q6PHC1;B1ARR7;B1ARR6	P17182;Q6PHC1	Alpha-enolase	Eno1
1.83655	0.493182	Q8CBB6;Q8CGP2;Q8CGP1;Q64475;P10853;Q6ZWY9;Q64525;Q64478;P10854;Q9D2U9;Q8CGP0;P70696;Q64524	Q8CBB6;Q8CGP2;Q8CGP1;Q64475;P10853;Q6ZWY9;Q64525;Q64478;P10854;Q9D2U9;Q8CGP0;P70696;Q64524	Histone H2B;Histone H2B type 1-P;Histone H2B type 1-K;Histone H2B type 1-B;Histone H2B type 1-F/J/L;Histone H2B type 1-C/E/G;Histone H2B type 2-B;Histone H2B type 1-H;Histone H2B type 1-M;Histone H2B type 3-A;Histone H2B type 3-B;Histone H2B type 1-A;Histone H2B type 2-E	Hist1h2br;Hist1h2bp;Hist1h2bk;Hist1h2bb;Hist1h2bf;Hist1h2bc;Hist2h2bb;Hist1h2bh;Hist1h2bm;Hist3h2ba;Hist3h2bb;Hist1h2ba;Hist2h2be
1.34984	0.621611	P56375	P56375	Acylphosphatase-2	Acyp2
1.65726	0.87533	Q3U2G2;Q61316;E0CY23;E9Q0U7;P48722;Q61699	Q3U2G2;Q61316	Heat shock 70 kDa protein 4	Hspa4
1.55914	0.832656	P62962;Q5SX49;CON__P02584	P62962;Q5SX49	Profilin-1;Profilin	Pfn1
1.4632	0.355877	F8WIS9;P11798;F8WHB5	F8WIS9;P11798;F8WHB5	Calcium/calmodulin-dependent protein kinase type II subunit alpha	Camk2a
1.4178	0.611524	Q9D172	Q9D172	ES1 protein homolog, mitochondrial	D10Jhu81e
1.5264	1.01822	Q6NT99	Q6NT99	Dual specificity protein phosphatase 23	Dusp23
1.32388	0.531283	Q8R1I1	Q8R1I1	Cytochrome b-c1 complex subunit 9	Uqcr10
1.53273	0.433488	P16045	P16045	Galectin-1	Lgals1
1.91788	1.01429	P97450;E9QAD6	P97450;E9QAD6	ATP synthase-coupling factor 6, mitochondrial	Atp5j
1.55642	1.4747	P48771	P48771	Cytochrome c oxidase subunit 7A2, mitochondrial	Cox7a2
1.3871	0.515267	E9PZ16;B1B0C7;Q05793	E9PZ16;B1B0C7;Q05793	Basement membrane-specific heparan sulfate proteoglycan core protein;Endorepellin;LG3 peptide	Hspg2
1.62129	0.611428	Q9D023;A0A0A6YY89;E9PY67;Q3V1C1;G5E869	Q9D023	Mitochondrial pyruvate carrier 2	Mpc2
1.38178	0.486136	P10493	P10493	Nidogen-1	Nid1
2.02106	0.909472	A0A0J9YUZ4;P63158;A0A0J9YUD8;D3YZ18;P30681;D3YVC6;A0A1B0GQX9	A0A0J9YUZ4;P63158;A0A0J9YUD8;D3YZ18;P30681	High mobility group protein B1;High mobility group protein B2	Hmgb1;Hmgb2
1.60992	0.877935	Q8BIW1	Q8BIW1	Protein prune homolog	Prune
2.22442	0.613812	Q8R1G2;E0CXH4;E0CXT6	Q8R1G2;E0CXH4	Carboxymethylenebutenolidase homolog	Cmbl
1.7607	1.13378	P14733	P14733	Lamin-B1	Lmnb1
1.66391	0.461964	P54822;E9Q242;E9Q3T7;A0A140LHU1;E9Q0A0;A0A0G2JFI8;A0A0G2JFL8	P54822;E9Q242;E9Q3T7	Adenylosuccinate lyase	Adsl
1.4465	0.445493	P48962	P48962	ADP/ATP translocase 1	Slc25a4
1.41097	1.39944	A0A0A0MQ90;P97352	A0A0A0MQ90;P97352	Protein S100-A13	S100a13
1.64992	0.373616	P11531;A2A9Z1;A2A9Z2;E9Q6R7	P11531	Dystrophin	Dmd
2.25355	0.413222	Q91Z53;D6REG4;B1AXQ0	Q91Z53;D6REG4	Glyoxylate reductase/hydroxypyruvate reductase	Grhpr
2.39199	1.36065	O08911;D6RG58;Q9Z1B7	O08911	Mitogen-activated protein kinase 12	Mapk12
1.59072	0.327849	A1BN54;Q7TPR4	A1BN54;Q7TPR4	Alpha-actinin-1	Actn1
1.41632	1.48254	Q61838	Q61838	Alpha-2-macroglobulin;Alpha-2-macroglobulin 165 kDa subunit;Alpha-2-macroglobulin 35 kDa subunit	A2m
1.70432	0.482352	P14148;F6XI62	P14148;F6XI62	60S ribosomal protein L7	Rpl7
1.3162	0.352286	D3YUM1;Q91YT0;D3Z1U9;D3Z0K1;D3YXX5;D6RG60	D3YUM1;Q91YT0;D3Z1U9	NADH dehydrogenase [ubiquinone] flavoprotein 1, mitochondrial	Ndufv1
1.40949	0.432604	A2AKU9;Q91VR2	A2AKU9;Q91VR2	ATP synthase subunit gamma;ATP synthase subunit gamma, mitochondrial	Atp5c1
1.46721	0.653492	P56391;A0A140LIU3	P56391;A0A140LIU3	Cytochrome c oxidase subunit 6B1	Cox6b1
1.56417	0.490704	P63101;O70456;D3YXN6;D3YXF4;D3YW45	P63101	14-3-3 protein zeta/delta	Ywhaz
1.61193	0.62461	G3X9L6;Q9DCX2;B1ASE2	G3X9L6;Q9DCX2;B1ASE2	ATP synthase subunit d, mitochondrial	Gm10250;Atp5h
1.67183	0.404035	A0A1B0GSE5;Z4YJJ5;Q80TQ2	A0A1B0GSE5;Z4YJJ5;Q80TQ2	Ubiquitin carboxyl-terminal hydrolase CYLD	Cyld
1.74922	0.462905	P52503	P52503	NADH dehydrogenase [ubiquinone] iron-sulfur protein 6, mitochondrial	Ndufs6
1.94976	0.463713	Q9DB77;A0A140LI98	Q9DB77	Cytochrome b-c1 complex subunit 2, mitochondrial	Uqcrc2
2.1521	0.59241	Q9WUM5;A0A0N4SVU4	Q9WUM5	Succinyl-CoA ligase [ADP/GDP-forming] subunit alpha, mitochondrial	Suclg1
1.88856	0.657271	Q8BH95	Q8BH95	Enoyl-CoA hydratase, mitochondrial	Echs1
1.87522	0.536243	P35486;P35487	P35486	Pyruvate dehydrogenase E1 component subunit alpha, somatic form, mitochondrial	Pdha1
1.64906	0.45286	O08749	O08749	Dihydrolipoyl dehydrogenase, mitochondrial	Dld
1.63959	0.400018	A0A1L1STE6;Q9D6R2	A0A1L1STE6;Q9D6R2	Isocitrate dehydrogenase [NAD] subunit alpha, mitochondrial	Idh3a
1.31927	0.487655	Q9EQ20	Q9EQ20	Methylmalonate-semialdehyde dehydrogenase [acylating], mitochondrial	Aldh6a1
1.35998	0.540603	P56480	P56480	ATP synthase subunit beta, mitochondrial	Atp5b
1.55046	0.490694	P14152;B1ATQ3	P14152	Malate dehydrogenase, cytoplasmic	Mdh1
1.50177	0.422202	P97807;H3BKG7	P97807	Fumarate hydratase, mitochondrial	Fh
1.47993	0.58069	P0DN34	P0DN34
1.40457	0.491315	Q9CR68	Q9CR68	Cytochrome b-c1 complex subunit Rieske, mitochondrial;Cytochrome b-c1 complex subunit 11	Uqcrfs1
1.40112	0.375001	P45591	P45591	Cofilin-2	Cfl2
1.529	0.463856	P05201;F7ALS6	P05201	Aspartate aminotransferase, cytoplasmic	Got1
1.56812	0.539128	Q03265;D3Z6F5;D6RJ16;REV__A0A0G2JE71;REV__P54729;REV__A0A0G2JGQ4;REV__A0A0G2JGG7;REV__Q6S5J6	Q03265;D3Z6F5	ATP synthase subunit alpha, mitochondrial;ATP synthase subunit alpha	Atp5a1
1.45464	0.490327	Q9Z2I9	Q9Z2I9	Succinyl-CoA ligase [ADP-forming] subunit beta, mitochondrial	Sucla2
1.8005	0.662203	P09671	P09671	Superoxide dismutase [Mn], mitochondrial	Sod2
1.96742	0.495265	Q9D3D9	Q9D3D9	ATP synthase subunit delta, mitochondrial	Atp5d
1.75343	0.701356	Q921R2;P62301;A0A0U1RQ71	Q921R2;P62301	40S ribosomal protein S13	Rps13
1.56628	0.789011	P45952;D6RFD7	P45952	Medium-chain specific acyl-CoA dehydrogenase, mitochondrial	Acadm
1.35661	0.576865	F6YH22;F6QL70;Q5M8M8;P47915	F6YH22;F6QL70;Q5M8M8;P47915	60S ribosomal protein L29	Gm5218;Gm17669;Rpl29
1.97919	0.565827	Q8BFR5;A0A0U1RNQ6;A0A0U1RPC4	Q8BFR5	Elongation factor Tu, mitochondrial	Tufm
1.60643	0.754138	Q61425	Q61425	Hydroxyacyl-coenzyme A dehydrogenase, mitochondrial	Hadh
1.32634	0.504604	A0A0N4SVQ1;Q62425	A0A0N4SVQ1;Q62425	Cytochrome c oxidase subunit NDUFA4	Ndufa4
1.30756	0.532188	P97384;D3Z7U0	P97384;D3Z7U0	Annexin A11;Annexin	Anxa11
1.44579	1.62962	Q8R404	Q8R404	Protein QIL1	Qil1
1.45123	0.522103	V9GXA0;V9GXX2;V9GWW6;V9GXK2;V9GX17;V9GX62;B7ZMP8;V9GXP3;Q5FW52	V9GXA0;V9GXX2;V9GWW6;V9GXK2;V9GX17;V9GX62;B7ZMP8;V9GXP3;Q5FW52	Muscular LMNA-interacting protein	Mlip
1.71577	0.873499	D3YWF6;Q7TQI3;D3Z7K0	D3YWF6;Q7TQI3	Ubiquitin thioesterase OTUB1	Otub1
1.42883	0.489361	P70296;D3Z1V4;D6RHS6;E9QLE5;Q8VIN1	P70296;D3Z1V4;D6RHS6	Phosphatidylethanolamine-binding protein 1;Hippocampal cholinergic neurostimulating peptide	Pebp1
1.52821	0.356802	P15327;D3Z223;D3YYH3;D3YUE8	P15327;D3Z223	Bisphosphoglycerate mutase;Phosphoglycerate mutase	Bpgm
1.40482	0.387394	P47857;P12382	P47857	ATP-dependent 6-phosphofructokinase, muscle type	Pfkm
1.75897	0.575105	P19157;P46425;Q8VC73;F6RWR5	P19157;P46425	Glutathione S-transferase P 1;Glutathione S-transferase P 2	Gstp1;Gstp2
2.11389	0.927161	P07309	P07309	Transthyretin	Ttr
2.33198	0.300746	P07310	P07310	Creatine kinase M-type	Ckm
1.88491	0.50033	P07934;D3Z472;D3Z1B5	P07934	Phosphorylase b kinase gamma catalytic chain, skeletal muscle/heart isoform	Phkg1
2.64988	0.929702	D3YUZ0	D3YUZ0		Ccdc83
2.94969	0.817906	P62880;D3Z1M1;D3YZX3;E9QKR0;D3Z1T4;H3BLF7;P29387;E9PWM7;A0A0A6YVN9;V9GWY1;Q61011	P62880;D3Z1M1;D3YZX3;E9QKR0;D3Z1T4;H3BLF7	Guanine nucleotide-binding protein G(I)/G(S)/G(T) subunit beta-2	Gnb2;Gnb1
1.47394	0.381011	Z4YJF5	Z4YJF5		Myom1
1.44201	0.423294	P70349;B0R1E3	P70349;B0R1E3	Histidine triad nucleotide-binding protein 1	Hint1
1.58284	0.333498	Q99LX0;A2A813;A2A815;A2A817;A2A816	Q99LX0;A2A813;A2A815	Protein DJ-1	Park7
1.3081	0.421948	Q9CPU0	Q9CPU0	Lactoylglutathione lyase	Glo1
1.54674	0.524075	Q7TSH2;F7DF70	Q7TSH2	Phosphorylase b kinase regulatory subunit beta	Phkb
1.44694	0.456765	Q564E2;P06151;A0A1B0GSX0;A0A1B0GSR9;D3YZQ9;A0A1B0GQX5;A0A1B0GT41;A0A1B0GSL7;A0A1B0GRW9;A0A1B0GS79;A0A1B0GRC1;A0A1B0GRS2;D3YVR7;D3YZE4;P00342;A0A1B0GSR2;A0A1B0GRE9;Q8BVP2	Q564E2;P06151;A0A1B0GSX0;A0A1B0GSR9;D3YZQ9;A0A1B0GQX5;A0A1B0GT41;A0A1B0GSL7	L-lactate dehydrogenase;L-lactate dehydrogenase A chain	Ldha
1.61255	1.32741	Q99LT0	Q99LT0	Protein dpy-30 homolog	Dpy30
1.37441	0.26508	P05064;A6ZI44;D3YWI1;A0A0U1RPN8;A0A0U1RPT5;D3Z510;D3YV98;A6ZI47	P05064;A6ZI44;D3YWI1;A0A0U1RPN8	Fructose-bisphosphate aldolase A	Aldoa
2.33102	0.791016	Q9CQZ6	Q9CQZ6	NADH dehydrogenase [ubiquinone] 1 beta subcomplex subunit 3	Ndufb3
1.933	1.26341	P47962;D3YYV8	P47962;D3YYV8	60S ribosomal protein L5	Rpl5
1.38648	0.453216	P47963;A0A140T8K8	P47963;A0A140T8K8	60S ribosomal protein L13	Rpl13
1.44727	0.382093	E9Q8K5;E9Q8N1;F6RSJ3;A2AT65;A2AT64;Q8BUJ6;F7A5H7;REV__Q8R271;REV__Q99L04;REV__A0A0A6YXJ3;Q3TYJ3;D3Z0M6;REV__Q3TRR0;A2AFG7;A2AFG8;Q6PGJ3;REV__Q9Z329;REV__P11881;O88485;P11627	E9Q8K5;E9Q8N1		Ttn
1.43201	0.955186	Q9WVA4;A0A0A6YXG6;Q9R1Q8	Q9WVA4;A0A0A6YXG6	Transgelin-2	Tagln2
1.57902	0.224746	P62983;A0A0A6YW67;E9Q9J0;E9Q5F6;Q5SX22;P62984;P0CG49;P0CG50;E9Q4P0;E9QNP0;D3YYZ2	P62983;A0A0A6YW67;E9Q9J0;E9Q5F6;Q5SX22;P62984;P0CG49;P0CG50;E9Q4P0;E9QNP0	Ubiquitin-40S ribosomal protein S27a;Ubiquitin;40S ribosomal protein S27a;Ubiquitin-60S ribosomal protein L40;Ubiquitin;60S ribosomal protein L40;Polyubiquitin-B;Ubiquitin;Polyubiquitin-C;Ubiquitin;Ubiquitin-related 1;Ubiquitin-related 2	Rps27a;Uba52;Ubc;Ubb;Kxd1
1.79341	0.431349	Q9CQ69;I7HPX6	Q9CQ69	Cytochrome b-c1 complex subunit 8	Uqcrq
1.62027	0.698441	Q9JK42;Q8BFP9;O70571	Q9JK42	[Pyruvate dehydrogenase (acetyl-transferring)] kinase isozyme 2, mitochondrial	Pdk2
1.59592	0.368681	P09411;S4R2M7	P09411;S4R2M7	Phosphoglycerate kinase 1;Phosphoglycerate kinase	Pgk1
1.4005	0.358883	E0CXN5;P13707;D3Z0L6	E0CXN5;P13707	Glycerol-3-phosphate dehydrogenase [NAD(+)], cytoplasmic	Gpd1
2.28439	0.841914	P80314	P80314	T-complex protein 1 subunit beta	Cct2
2.09149	0.670128	P50247	P50247	Adenosylhomocysteinase	Ahcy
1.58355	0.568785	Q8BKZ9;A2AWH8;A2AWH7	Q8BKZ9	Pyruvate dehydrogenase protein X component, mitochondrial	Pdhx
1.43499	0.351608	P21550;Q5SX59;J3QPZ9;Q5SX60;Q5SX61;D3Z2S4;A0A0N4SUI6;D3YVD3;F7B6Z5;B2LVG5;B2LVG6;E0CXT7;Q8BQZ5	P21550	Beta-enolase	Eno3
1.4912	0.556895	P61982;P68510	P61982	14-3-3 protein gamma;14-3-3 protein gamma, N-terminally processed	Ywhag
1.82711	0.578012	A0A087WPE4;A0A087WQE6;A0A087WNT1;P83940	A0A087WPE4;A0A087WQE6;A0A087WNT1;P83940	Transcription elongation factor B polypeptide 1	Tceb1
