# Supplementary material for: An Exercise-Induced Metabolic Shield in Distant Organs Blocks Cancer Progression and Metastatic Dissemination
Source: Oxford University Press journal article supplement (doi:10.1158/0008-5472.can-22-0237), 2022-09-09
Supplement: can-22-0237_supplementary_table_s3_suppst3.xlsx [file can-22-0237_supplementary_table_s3_suppst3.xlsx]

## Sheet: Table S3
Supplementary Table S3 Melanoma metastasis ranked tissue matrix
	melanocytes	benign nevi	atypical nevi	VGP	in situ	lymph node	lung	soft tissue	liver	brain	adrenal	small intestine	bowel	bone	spleen
A2M	9261	11257	11298	11105.5	11530.5	11049	10860	11018.2	11533	11793	11291.5	11177.2	10355.5	11592	10853.2
A2ML1	57	6311.5	3622	6714	3820.5	204	305	86.75	182	58	109.5	116.75	187	141	68
A4GALT	2391	1853.5	1735.5	576.5	2436	3183.25	3420	2556.25	2027	2715	1219	1768.5	2011.5	2923	2053.5
AAAS	9668	3576.25	3551	2678.25	4238.5	5010.5	4494	4737.25	4929	10005	5201	4144.25	4791	4172	5093.5
AACS	7426	10174.5	9986.25	9742.75	7716	5754.75	3801.75	4767.75	5073	7008	5046.5	3832	3830	3232.5	4417.25
AADAC	30	6597.25	4067	6125.75	927.25	961.75	1039.25	1445.25	9884	24	1219	1611	1700.5	960.5	1489.25
AADAT	5004	1593.5	3149.25	813	2213	3968.5	3906.5	4737.25	6493	3048	6023.5	2866.25	3830	6643	5787.5
AAK1	6321	7333	7705	8086.75	7858	4219.5	3883	3856.5	4458	7394	3724	3383.5	2609	3513.5	3551.75
AAMP	9744.5	7297	7938.25	7789.25	6031.5	7659.5	8189	8779.75	7479	8606	9471.5	8219.25	8315.5	8355.5	9008
AARS	11230	8871.25	9149.75	9432	9138.5	11394	11243.5	11358.2	11438	11013	11343.5	10904.8	11312.5	11224.5	11360.5
AARS2	7196	5372.75	5626.5	4651	5622.5	8447.5	8377	7575.25	8244	6279	9404	8386	9457.5	6680.5	8360.5
AASDH	3252	6575.25	7497.25	6418.25	6583.5	6102.5	5304.5	5334.25	6951	2685	5267.5	6068.5	6053.5	5492	6529
AASDHPPT	10258	10240	10729.8	10625.8	9674.5	8639	8400.75	9262.25	7796	9044	9573	9170	7506.5	9286.5	9535.25
AASS	9043	2350	4160.25	3305.5	4670.5	4676	4435.75	5118	5667	9816	2485.5	5273.5	5333	3505	5302.75
AATF	9699	6479.25	4263.25	6589.75	8091.5	9097.25	8347.5	9194.75	9090	8957	9801	8848	8258.5	7668	8260.75
ABAT	5918.5	4771.5	2857.25	4547.75	4813.5	1621.5	1570	1303.5	6056	7105	1125.5	1009	322.5	882.5	1493.5
ABCA1	3843	9143.5	10271.8	9622.25	4499.5	9954.5	8609	10077.2	10646	3223	7894.5	10170.5	8961.5	10749.5	8304
ABCA11P	1097	5855.75	5574.25	3617.75	1650.5	1805	1625.25	1890.25	1788	641	3542.5	1514.25	1174	1866.5	2909.75
ABCA12	315	7297.75	3294.5	9234.75	3690	932.5	651.75	1087.5	3173	368	656	696.75	515.5	541	575.75
ABCA13	1223	1163.25	610	1128.75	65	451.5	458.75	87.25	562	872	3.5	89	268.5	327	412.25
ABCA2	4368	4109.5	5616	3387.75	2888.5	4162.5	5376.25	4271	4420	6388	580	5205.75	3930	4148.5	3733.75
ABCA3	3078	3063.5	2791	1927.75	3560	5108.5	7698.5	5243.5	3991	3114	4952	4835.5	8499	4624	6633.75
ABCA4	1096	2128.5	2540	3184.75	2402.5	2023	927.25	1051.75	3956.5	1136	580	855	1432	351	667.5
ABCA5	5034	10460.5	10493.5	9992.75	8855	2600.5	4737.5	2933.75	3586	4898	1022	4605.25	4124.5	639.5	995.75
ABCA6	257	6294	3577	3893.25	2132.5	2399	2739.25	2062.25	6903	445	580	4861	4176	5769.5	1467.5
ABCA7	4089	2872.75	2275.25	3886.25	3310.5	4616.5	4986	4501.5	4272	4656	152	4369.25	4450.5	5070.5	4081
ABCA8	98	10564.8	10459.2	8714.75	7234	3741	2317.5	3093.5	7837	102	3724	2841	2058.5	3264.5	6447.75
ABCA9	235	5432.25	4550.5	4174.75	3620.75	2354.5	2396	2199.25	3694	309	2023.5	3460.25	1971	2771	3255.25
ABCB1	1141	2059.5	2305	2135.5	1812	2921	2519	2810.5	5040	857	3628.5	2301.5	2847	2427.5	2557
ABCB10	6672	7792	6235.25	7563.5	5634.5	6444	5881.75	6469.25	6760	6429	6977.5	6348.75	5631.5	5751	7089
ABCB4	8535	2677.25	2548.75	3835.5	3417.5	3077.5	1237.25	1980.75	8226	5650	8545	2972	998	3401	4229.75
ABCB5	2057	2417	169.5	3840.25	1876	630	945	689.5	478	2058	92.5	274.25	1931	216	359.5
ABCB6	7463	3854.75	3968.5	3633.25	4663.5	7965	7736.5	8110.25	9057	6279	8458	7466.25	9245	7451.5	8887.5
ABCB7	8236	6543.75	5690.5	5318	7316	6878	6810.5	6627	8144	6822	6023.5	6708.25	6264.5	5971	6983.5
ABCB8	6677	2622.75	3081.75	1703	2632.5	2651	3070.25	3295.5	2120	6963	2455	2393.75	2011.5	1721	2351.5
ABCB9	3611	1546	1309.75	1058.25	2566.75	7885	7435	8250.5	6802	4169	6782	6872.75	8008.5	9436.5	8093
ABCC1	7175	7735.5	6517.25	8697.25	11089	3722.5	2871.75	2464.5	2010	7542	4610	2868.25	1800.5	2209.5	1956.75
ABCC10	5205	6475.5	5276.75	5370	7861	5331	5515.75	3715.5	4882	5371	5806	4480.25	5565	5338.5	4525
ABCC11	1633	961.75	1242	836.25	518.5	2287	1977	2094.75	2589	1742	819	2280.75	2508	2576.5	2697.25
ABCC2	8112	593.5	1301.75	2272.75	2227.5	2807.5	2741	945.75	6298	7384	7307	3869	3489.5	1818	2549.25
ABCC3	1625	6026.75	3917.5	5868.25	6046.5	5946	4921.25	4950.25	10015	1779	3044	5209.5	4883	5412	4547
ABCC4	6961	6140.5	5408.5	6963.75	4767	4543	5180.5	5616.75	3256	6522	8163	3390.25	6766.5	5221.5	5353
ABCC5	8418	7025.75	7697.5	6808.25	10168.5	8487.5	7012.5	7717	8929	8292	9404	7187.75	7189.5	6745	7597.5
ABCC6	2817	968.75	509	909.25	1427	340.5	2073.5	2039.75	6476	2716	2523	1464.25	1846.5	1818	2030.25
ABCC8	1843	348.25	351.5	136	903.5	698.5	555	224.5	623	1868	397.5	514.75	223	357	314.25
ABCC9	115	2752.75	4652	2928.25	875	1989	1371	1883	3523	133	2642.5	2019.75	1558	1741	2096.5
ABCD1	5438	2748.25	1581.5	1964.25	2510	5855.5	5870.75	4754.75	5830.5	6879	2369	5277.5	7189.5	6539	4306.25
ABCD3	9134	10878	10743	10862	9446	5136	5938	5560.5	4060	10211	6340	5703	5611	4952	5926
ABCE1	10918	8831.25	9550	9882.5	10371	8513	8789.5	9197.75	6037	10045	9534.5	8661.75	9277.5	8739.5	8958.75
ABCF1	10696	8318.5	8711.5	7749	8780.5	10772.5	10780.5	10703.8	11012	10061	11333	10992.2	10958	10718.5	10971.8
ABCF2	9766.5	5749	5860.75	7660.25	5900.5	7806.5	7267	8110.25	6641	9414	8996.5	7370	6120	6869.5	7374
ABCF3	8183	3946.25	5156.25	4035.25	4632.75	5276	4582.75	4581	5119	7774	5387.5	5187.25	4541	4535	4879
ABCG1	2204	5998.5	5503.5	6041.25	5631.5	4949.75	5030.5	5392	5365	2203	4174.5	6332.25	5131	8517.5	5333.5
ABCG2	1751	2067.25	2853.5	2144	2507.5	493.25	337.5	497.75	664	2711	14	591	1800.5	191.5	122.25
ABCG4	2657	2061.5	4120.25	2455.75	965	2146.5	2333.75	2507.75	1164	2555	2414	2977	2508	2682.5	2486.75
ABCG5	1579	351.5	81	293.5	218.5	2966	1823	1488.5	5701	1185	1077	862.5	3780	1361.5	1606.75
ABHD1	2588	1880	2072.25	1376.75	233	2005.25	1547.5	1214.75	3039	2643	913.5	1718	708	1479.5	1956.75
ABHD10	9782.5	6843.5	8345.75	7291.5	9107	6942.5	7075	7196.5	7280	7906	8696.5	7208.5	8408	7202	8272.25
ABHD11	4772	5951.5	6316	5820.25	6180	4126.75	3768.25	3881.75	3319	4766	3183.5	4351.75	2812	4897.5	4152.75
ABHD12	9786	7683.75	6995.25	8273.5	8516	8610.5	8627.25	8779.25	7307	10150	8477.5	8595.5	9211.5	9207	7237.25
ABHD14B	5789	7212.75	8541.25	6704.75	9751	6348.5	7329.75	6259.5	7176	6555	7838	7212.25	7969	6599	6344.25
ABHD15	4994	3511.5	1993.25	4241	3141	5543.5	4666.25	4814.75	5230	5815	3323	5515	4104	4784.5	4999.75
ABHD2	11040	6184.25	7860	8375	7815	5135	5936.5	5263.75	5180	11450	4336.5	4763.75	5198.5	5852.5	5038
ABHD3	7855	7059	3904.25	7783.25	5933.5	5583	3952.5	4657.5	4519.5	6701	4212.5	4832.75	3225	3827	5178
ABHD4	5736	5651.5	6972.75	6040.5	3270	4718.5	5147	4793.75	4441	9410	3454	5365.5	4909	5317	4911
ABHD5	5506	7621.75	5316.5	10321	5614.5	5830.25	6446.25	6186.25	5300	6850	3796.5	6488	6053.5	5965.5	5878.5
ABHD6	8627	7533.5	6236.25	6292.75	8282.5	6975	7530.5	6763.75	7538	9974	5729.5	9056.25	8298	9339.5	7969.5
ABHD8	4303	1517.75	436.25	1310.75	954.5	7429.5	6475	6720.75	7991	5221	4101.5	5926.25	6351	6066	6348.25
ABI1	10308	10158.2	10043.5	10823.8	7822	7151	9029.5	7213.25	6986	10094	8143	8714	9531	8606	7718
ABI2	7319	7391.5	9408.5	8948	9429.5	8192.5	7501.75	8557	7006	9209.5	7307	7765	7189.5	7988.5	8418
ABI3	2456	2719.25	3533.5	3353.5	2300	4998	5445.5	4724.25	5347	2523	2841.5	5884.25	4703	6260	3263
ABI3BP	875	10998.8	10135.5	10063.5	6100.5	3928	3506.25	4315.5	4669	987	4124.5	3055.75	3883.5	6511.5	1808.25
ABL1	8750	8513	9547.75	7868	5852.5	9811	8914.5	9484.5	9592	10872.5	8596	10077.5	9878	9262	8958.25
ABL2	10404	4990.75	5050.25	4927.25	9126	4965.5	4751	5694.5	3346	10831	4403.5	4920.75	6167	6069	4242.25
ABLIM1	2783	11473.5	11396	11204.8	11429.5	7297.5	5648	8190.5	9546	3655	10574	4803.75	5315	6360	6757.5
ABLIM2	3255	2420.25	7212.25	3766.5	2699	2686	2070.25	2246.75	3564	3490	1320.5	2197.25	1602.5	1479.5	1734.5
ABLIM3	5032	3604	4329	1688	4471	4872.5	4160.75	5354.5	4588	5243	1924.5	3184	3725.5	5130	4740.75
ABR	8638	9395.25	10737.8	9667.5	9261	10781.5	11199.5	10711	10794	10482	11297	11282.2	11182	10755	9785.75
ABT1	8733	4938.25	5365.75	5231.5	3910	4522	4345.75	3923.75	2824	6848	6139.5	4069.75	3199	3669.5	4692.25
ABTB1	4878	3746.5	1982.25	3500	2226	7826	5566.75	6722.5	7675	6138	3424	7187.75	7127.5	6112	6791.25
ABTB2	3703	4395.5	5039.25	3564	3928.5	4679	5693.5	4123.75	4379	5230	6629	6205.5	5422	4623.5	4211.5
ACAA1	8214	8962.75	8733.5	9404.5	7841.5	8328.5	8055.5	8531.25	10397	8673	8528.5	9011	8128.5	8446.5	8372.75
ACAA2	8280	8540.5	8181.5	9932.25	9962.5	7553.5	7932.75	8571.25	9952	8807	8340.5	8190.75	7969	8256.5	7938
ACACA	8491	6808.75	7159.75	6423.75	8608	8605.5	7515.25	8549.25	8770	8616	10454	8753	8144.5	7747.5	8089
ACACB	4989	5737.5	8278	6072.5	8773.5	6936	3606	5436.25	10194	6402	7702	5835.75	949	5790.5	6269.75
ACAD10	6259	4290	3949.25	3743.5	4566	5889	5599.75	5676.25	7192	4652	6540	5631.25	6481	5511	6310
ACAD8	6672	8398	7015.5	8953.5	4212	7066	5775.75	7066.5	7682	5800	7264	6530.25	5760.5	6401.5	6748.25
ACAD9	10084	9137	8935.25	8459.5	7429	8744.5	8260.75	8790.5	8869	9520	8748.5	8615.25	8685	7889.5	8861.25
ACADM	11157.5	10423	10015.8	11107.5	6347	10217.5	10364.2	10465.8	10990	10908	10327.5	10016	10844	9449.5	9759.75
ACADS	4013	3848.25	3619.5	4308.25	3022.75	4659.5	5579.75	4825.25	7795	4827	3770.5	3759	4999	4587	4670
ACADSB	9496	7126	5139.25	5377.25	5632	1565	2555.75	1803.5	3472	5865	1772.5	2248.5	1351.5	1565.5	1954
ACADVL	9549	10747.5	10580.5	10853.8	8899	11167	11099.2	11267.2	11595	10704	11200	11220.2	11293	11109.5	11122
ACAN	2479	2286.75	3343.75	1537.75	1724	1669	1224	971.5	1094	1898	1826	1664.25	672	1818	623.5
ACAP1	2431	1030	1883.75	3165.25	2685	4380.5	4595.75	3960.5	2730	2497	1022	4069.5	3754	2984.5	2049.75
ACAP2	10603	10259.2	9728.75	10209	9168.5	6127	6315	6791.25	4787	10509	7307	6845.25	5611	6160	7342.75
ACAP3	6120	6479.75	6897.75	5395.75	4213.5	2123	555.5	816	2012	7434	31.5	850.5	1257.5	553.5	1351.5
ACAT1	9501.5	10764.8	10507.2	10412	10052.5	10116	10268.2	10625.5	11537	8309	10796.5	8413.5	10054.5	10492.5	10815.5
ACAT2	10117.5	8538	8163.75	10519	8093.25	7953	7517.25	9177.5	8440	8699	7075	6274	8162	7870	8260.75
ACBD3	10922	10287.5	9927.75	9817.25	10049.5	9696	9952	10021.5	9333	10538	10722	10177.2	10012	10301.5	10180.8
ACBD4	3244	3904.75	5102.25	4325.25	1996	2276.5	3150.5	2827	4080	4201	2261	2411.5	2422	2742.5	3095.75
ACBD6	6606	5939	7367.25	5623.75	8115.5	7116	6964.75	7170	6883	6648	8712.5	7173.75	7783	6765	6732
ACCS	4716	5025.5	3542.75	2638.75	6496	4692	5853.25	5793.5	4408	4321	4772	7248.5	7316	6599	5907.5
ACD	6063	4125.75	3959	5314.25	6640.5	6674.75	6687	8011.5	6405	6170	6496.5	6444.25	6999.5	6322.5	7107.5
ACE	1316	1288.25	1415.75	1320.25	2145.5	1276.5	875.25	1315.5	515	1551	2023.5	974.25	737.5	1629	534.5
ACER3	6491	8296.75	7785.75	9178.75	8338	7723.5	7977	8629.75	7884	5191	7626.5	9177.75	7445	9176.5	7430
ACHE	1850	1455.25	2603.75	2116.25	1290	1408.5	1609.5	1133.5	998	2213	1270	1315.5	1174	1054	1136.25
ACIN1	7442	5749.5	5658.25	6093	4910.5	8364.75	8451.25	8206.75	9005	8039	9065.5	7962.5	8993	8608	8558.25
ACLY	11537	10689.5	10449.8	10924.5	8342	10862.5	10435.8	10629.2	10335	11558	11149.5	10448.2	10169	10307.5	10563.2
ACO1	9135	9072	8498.25	8648.5	6349	10081	9247.25	10247.2	10585	9829	9547.5	9757.75	10622.5	10193.5	9206.75
ACO2	10773	7822.5	6573	7500	7825.5	8785.5	9544.25	9407.5	7935	10660	10339	7777.25	9378.5	8388.5	8673
ACOT11	2651	2820.5	3490	1965.75	2866	4267.5	1987.75	2064.5	4609	3445	5557	1310	2147	4474.5	2610
ACOT13	6650	7377	5510.5	8399.25	10229.5	8590	8136.75	8479.75	9310	5206	9442	9966.75	8008.5	9176	8421.25
ACOT4	3670	2952.25	2892.5	2054.25	3575.5	4712.5	3294	3952.75	6291	5361	1726	3235	6419.5	5943	5018
ACOT7	8090	6128	6886.5	8280.5	8832	11276.5	11411.8	11465.5	11168	9061	10999	11039.2	11379.5	11541	11215.8
ACOT8	6930	3958.5	3521.75	4836.25	2430	4975.25	6071.5	5978.5	4196	6763	5780	5224.5	6676	6348.5	5167.25
ACOT9	9046.5	6480	7805.75	8040.5	9312.5	7817.5	7897	8445	6708	7877	5171.5	8338.25	8873	7262.5	7778.5
ACOX1	8996	7420.25	6679.25	7142	9577.5	5738.5	6386.75	5813.5	6416	9114	6455.5	6856.25	6073	5222.5	5500.75
ACOX2	1447	5785.5	4911.25	6977.25	3021.5	4536.5	2143	3269.5	10486	1477	7075	2526.5	1652.5	4426.5	5962.25
ACOX3	4917	5446	5573	4411.25	5510.5	7146.5	6381	6068.5	7860	5622.5	7702	6487	6187	6551.5	5003.25
ACP1	11117	9735	10045.2	9943.5	8967	10668	9978.25	10836.2	9152	10123	10772	10781.5	10567.5	10524.5	11260.2
ACP2	6733	5500.25	6031.75	5809.5	6613	8060.25	8756.5	9046.5	8940	8757	7955.5	9455.75	7969	10062	7622.5
ACP5	8700	6513.5	8105.25	8593.75	4241	9057.5	9373.75	9736.5	7679	7915	9801	8526	10138.5	8118.5	9153.25
ACP6	7246	6395.25	7347.75	7996.25	6152.5	6388.75	6214	6807.5	5855	6110	6957	5566.25	6351	6688	6843.75
ACPP	797	7241	4532	8160.5	3923	942	1259	1309.25	332	723	1772.5	1675.75	3805	921	1120
ACPT	3533	3592.5	5062.25	4516.25	1726	4000.5	3327.75	2695.25	5369	3453	2564.5	2998	3146.5	2839	2807.75
ACRBP	1216	2148.75	518.5	1837.5	1739.5	1466.5	1528.5	848.75	1774	1178	438	1644.25	1351.5	1526	1732.75
ACRC	2492	2638.5	1821.25	2552.75	1663.5	3957	3487.5	3756.75	5338	1505	3651	3329.5	4124.5	3656	3789
ACRV1	528	2359.75	2426	2165	301	2021.5	1177.25	1991.25	1896	536	2929	2403	2011.5	1785.5	2588.5
ACSBG1	1775	6943.75	9913.75	10937	7291	3188	2224.25	2775	3117	1808	3843.5	1808.25	2011.5	7623	4365.25
ACSF2	3618	4914	4792	5168.25	5416	4011.5	3712.75	6088.25	5384	5406	9152	5208.5	2572.5	4689	6547.5
ACSF3	4448	2447.5	2068	1744.5	3303	1571.5	1992	1443.75	1538	4359	1635.5	1121.75	2468	1749.5	2296
ACSL1	10255	11584	11244.5	11579.5	8589.5	7694	7095	8233.25	10154	10853	6733	7535.25	8239.5	8552.5	8352.25
ACSL3	11586	8926	7687.25	9799.75	9974.5	10308.5	10600.8	11061.5	9440	11399	10510	10705	10517	10433.5	10831
ACSL4	9566	4432.75	2800.25	3514.75	6198	8511.5	8872.25	8867.25	6602	8849.5	7766	8876.75	8202.5	9011.5	7820.75
ACSL5	1987	3837.5	5218.5	5678	6561	6105	8058.25	5175.75	10404	887	4192.5	6797.5	8754.5	5127	4016.25
ACSL6	811	928	2950	1331	391.5	529	1101	868.5	1303	721	438	1396.25	2192.5	2017	1133.5
ACSM1	688	1152.5	595.25	326.5	1254	249	291.5	220	155	620	47.5	205.75	173.5	825	63.5
ACSM3	538	3815	1374.25	4859.25	1323.5	1578	1396	1967.25	5605	610	2261	2468.75	201.5	1667	1804
ACSM5	1391	2639.5	1628	2940.5	1757.5	2202	1098.75	991	9496	1521	1586.5	2033.75	1303.5	1092.5	1190
ACSS1	7073.5	3830.5	3369.25	3864.5	6962.5	7610.5	7542.75	6434.5	6394	6973	10518	7391.25	8944	6160	7851.75
ACSS2	7856	7741.25	6508.25	8208	7991.5	10503.2	9588.5	9897.75	11088	6839	9388.5	10310.8	10214.5	9969	9762.25
ACTA1	5260	1932.75	4260.5	2264.5	622.5	1553	1365.25	2138.5	2287	5857	543	898.75	1971	870.5	1120
ACTA2	1443	11528.5	11454	10608	10299	11508	11274.8	11474.5	11512	7586	10414	11591.8	10805.5	11165	11117.8
ACTB	11828	11810.5	11802	11819.5	11834	11814.5	11824.8	11790.5	11779	11834	11812.5	11793.8	11795	11820	11780.8
ACTC1	278	4609.25	5343.5	2323.75	629	660	1341.25	632.5	678	388	397.5	1246.5	292.5	621.5	358.25
ACTG2	1653	8841	9428.75	5110	3774.25	8130.25	6491.5	6809	7363	1780	7032.5	5513.75	3883.5	7440.5	6308.25
ACTL6A	8335	7949	7824.75	8486.25	5220.5	9909.5	8974	10752.5	8856	6464	10113.5	9695.75	8855	9684.5	10821.8
ACTL7B	3469	184.25	211.75	430.5	900	2684	741.25	542	1156	4127	1172.5	255	187	583	720
ACTL8	2278	546	253.25	324.5	313.5	1548	1605	1733.5	2487	2218	2138.5	851.75	515.5	913	1763.25
ACTN1	11529	11031	10707	10872.5	10807.5	11148.5	10550	10760.8	10948	11561	4049.5	10583.8	10751.5	11014	9898.5
ACTN2	2582	1680.25	2859.75	2192.5	1432	3546	587	615	4448	1189	543	429.5	201.5	398.5	374.75
ACTN3	2476.5	290	850.5	670	485.5	564.25	1083	581.75	603	2721	267.5	682	1257.5	921	903
ACTN4	11710	10001	9870	8698.25	8431.5	10203	10692.5	10412.2	10185	11662	10414	10207.8	10630	10836	9896.25
ACTR10	9040	10988	10767.5	11030.2	10167	9347.5	9562.25	10009	8970	10139	8849	10174	9098.5	10043	10079.5
ACTR1A	10679	7084.75	7511.5	7983	10940	9987	9414.5	9558	9678	11092	7876	8973.5	8736.5	9194.5	9016.25
ACTR1B	7434	8044.5	8200.5	7375.5	5556	8246.5	9161.5	8167.5	8459	8166	7285	8637.25	9916	8438.5	8587
ACTR2	10629	11216.5	11283	11505.5	10472	10751	10600.5	10754.5	11102	10347	10963.5	10778.8	9344.5	10661.5	10799.5
ACTR3	11738	11586	11414.5	11681.5	11297.5	9493.5	9707.25	9400	8827	11753.5	9335	9141	9425.5	9272	8914.75
ACTR3B	7280	3420.75	3933.25	3282.5	5527.5	3011.5	3547.5	2797.75	3328	5926	3183.5	3058.25	2508	3013.5	3639.25
ACTR3C	249	1515.75	2064.25	1024.5	2096	283.5	787	1405.75	350	183	619.5	1326	625	755	987.5
ACTR5	6267	3605.25	4723.25	3250.25	5483.5	6768	5557.5	5666.25	7064	4741	6733	4759.75	6578	4897.5	5673.5
ACTR6	7221	8531.75	6894.25	8900.5	6139	8451	7951.5	8640.75	8288	4632	7876	8679.75	8061.5	8412.5	9118.25
ACTR8	8396	5237.25	5312.5	5557	4995.5	4166.5	3890.25	4463.5	3017	7696	5026	5139.75	3805	3369.5	4937.25
ACVR1	9963	8793.5	8433.5	8760.5	6848.5	9948	9694	10063.5	9177	9073	9167.5	10134	9441.5	10635.5	9415.75
ACVR1B	5358.5	10044	9115	7816.75	7832.75	8509	7132.5	7701.75	8839	5209	10212	7834.5	7422.5	7951.5	8159.25
ACVR2A	5146	9048.25	8137.5	7221	10089	5285.75	5466.5	5399	5898	4741	7329	5691.75	4974.5	4710	5615
ACVR2B	4426	4416.25	5064.75	3498.75	3638.5	2195	2370.25	1722.25	3170	5787	4587.5	2227.75	1126.5	1925.5	2929.75
ACVRL1	3066	4422.75	3264	3264.5	4509.5	4291	7073.5	7393.75	2922	3157	9430	7821.5	6834	5845	6336.75
ACYP1	2005	7394	7351.75	6938.25	8496	9080.5	9444.5	9949.25	8868	2022	6757	9871	9820	9611	10028
ACYP2	2998	6293.5	6951.25	6957.25	5383	5711.5	6326	5775.25	5975	2868	5935	6396	7040	8568	5399.75
ADA	7497	5113.75	1779.5	3154.5	5733.25	8424	9130.75	7975.5	6650	6971	9914	7837.5	9328.5	7850.5	6906.5
ADAD2	4587	1616	1624.75	452.25	1390.5	1303.5	528.75	506.5	1416	4710	819	272.5	515.5	351	339.25
ADAL	6812	2030.5	2717.25	2173.75	3202	3580	4370.75	4103.75	4295	6690	2929	4023.75	4519	3428	5630.5
ADAM10	11528	10650	10584.8	10990.8	11190	4714	5118	5136	3204	11510	5451.5	4663.25	5741	5321.5	5770
ADAM12	1716	3765	1911.75	1609.5	4814	1749.5	2112	2256.5	3494	4006	2782.5	1268.5	1520	2424	2259.25
ADAM15	7168	8422.5	8965	8263.75	5513	11246.8	11235.5	10912.8	10781	7843	10902.5	11289.5	11307	10965.5	11077.2
ADAM17	9198.5	7942.5	7733.5	8031.25	8417.5	7234	7708	7741	7635	8055	8163	7266.25	7857	8814.5	8560
ADAM19	2224	3143.25	4598.25	4227.75	7971.5	8488.5	9108	7367.75	6712	4071	3843.5	6784.75	7485	7420.5	6714.5
ADAM21	450	532	3385.5	1854.5	321	1394.5	764.75	639.75	1832	404	1022	654.75	998	921	1152
ADAM23	5748	1151.5	3539.25	3907.5	2837	3358	7025.75	4779.5	4188	8191	3399	3099	7875	9147	1778
ADAM28	403	3332.25	698.25	4744.75	3823.5	1469.5	1075.25	1698.5	2211	390	962	1937	1846.5	2055	1259.75
ADAM8	3700	2319	1011.75	3380.25	3793.5	3974	5430.25	3245.5	2348	3809	962	2581	4662.5	4403	2651.5
ADAM9	10682	10556.5	9324.5	10261.8	7552	4889	3558.5	2897.75	4000	10273.5	2369	3523	2147	2947.5	2467.25
ADAMDEC1	269	1580.25	2140	9777.25	2803	5214	3262.75	5888.75	2533	283	241	6203.25	4999	6604.5	2288.25
ADAMTS1	7992	8161.75	6779.25	9305.25	5059.5	5908	5518.75	6423	5391	6153	5961.5	6824.25	5154	7590	6320.25
ADAMTS13	2546	2004.75	3494.75	1831	2609.5	881	2129.75	1868.25	4136	2770	962	2167.75	2147	960.5	1865
ADAMTS2	4559	7808.5	5167.25	5054.5	4902.5	2322.5	3295	2363.75	2362	4270	2294.5	2152.75	2307.5	2576.5	1024.5
ADAMTS3	2756	2201.75	2775	1293.75	2105	1115	1343	1577	948	1523	1125.5	2559.25	949	800	1715.75
ADAMTS4	3227	1104.25	2017.25	861.75	324.5	1533.5	1322	860.25	406	3791	771.5	528.25	905	960.5	735.25
ADAMTS5	1501	9134.5	8784.25	9047.75	6349.5	1498	1792.25	2087.75	713	1186	1924.5	3240.25	1079.5	1314.5	1621.75
ADAMTS6	843	1725	1775.5	1681.5	2169.75	1508.5	1648.25	1053.25	1460	844	1971.5	1232.75	1079.5	749.5	2084.5
ADAMTS7	3192	753.25	1659.25	979.75	1351.5	1991.5	1513.25	1679	1487	3949	5387.5	1271	247	1962.5	1757
ADAMTS9	3432	2223.75	2418.75	2665.5	6316	4408.25	2794.75	4534.75	4340	3659	4839.5	4225	2508	2867.5	4499.75
ADAMTSL1	1763	3389.5	1981.75	1883.75	2038.75	2557	2344.5	2218.5	1760	2190	2485.5	2132	2100.5	1699.5	1821.5
ADAMTSL3	964	3139	2583.25	2056.75	527	1924.25	2541.75	2542.75	3624	921	2674.5	2311.25	2572.5	2099.5	2437.5
ADAMTSL4	3535	3899.75	2730.75	2649.75	2689.5	3232	3666	2590	3133	3962	4101.5	2997	3625	4101	2790
ADAMTSL5	2434	529.75	561.25	291.75	1204.5	2580	3448	2138.5	2366	2978	471	2656.75	4149	3640	3017.75
ADAP1	2564	4495.25	5880	4262.75	3433	8375.5	7260.25	5787.75	8801	3830	10574	7465.25	5925	7929.5	6215.5
ADAP2	1609	5937.25	3935	5840.75	4600	9097.5	7634.5	8300.5	8841	1689	7307	9449.75	7377.5	10334.5	7320.75
ADAR	10656	10846	11045.8	11121	11566.5	11188	11233.2	11221.2	11269	11108	11374.5	11348.8	11234	11171.5	11210.2
ADARB1	6419	7203.5	7087.75	6633.75	7010	9576	9982.75	9903.25	9864	6390	10005	9276	10761	10431	9406.75
ADARB2	2511	187.25	672.25	125.25	1114	1432	1800.5	1098.25	2858	2506	2183	1623.75	1217	614	1253
ADAT1	9406.5	3736	3766.5	4261.75	4711	7177.75	7467.25	7573.75	6529	8219	5935	6722	7275	6666.5	7402
ADCK1	3289	4434	4266.75	4966	6806.5	5758.5	5776.5	5135.75	6143	5836	4610	5949.5	6676	5115	5934.75
ADCK2	4670	6814	6164.25	6619.75	5788.5	9690	9067	9070	9490	4854	8976	9478.5	9502.5	10183	9405.5
ADCK4	4301	3817.75	3580	3907.5	5053.5	5025	5495.25	5678.25	4976	4280	7190	5590.25	6632	5489.5	5026.5
ADCK5	4210	2262.75	1330.75	1678.25	1996	4330	4695	3907.25	5276	4567	5089	3400.75	4791	5725.5	4609.5
ADCY1	7699	2801	3454.25	2319	1682.5	5470.5	5126.75	4763.75	5935	6167	5753.5	3928	6578	3902	4118.25
ADCY2	4940	7086	5446.75	8964.75	5597	3287.5	977.25	660.75	3713	3695	1219	796.75	737.5	913	895.25
ADCY3	7573	6209.75	6938.5	6691.5	7174.5	10810	9742.5	10287.5	9935	7374	8163	9998.5	9951	10578	9889.5
ADCY4	2831	6323.5	7188.5	5708.5	5724	4562	3861.25	3695	4940	2967	3112.5	3326	3461.5	2833	3614.75
ADCY5	2533	984	2669	1297.75	849.5	333.5	1535.5	1243.5	402	2713	913.5	1400.25	1217	1392	1821.75
ADCY6	6273	4895	6688.5	5717	3395	7091.5	6847.75	6622.75	7207	8902	10796.5	6259	6419.5	5971	7517.25
ADCY7	3789	8698.5	6637.25	8677	5667.5	4297.25	4773	3645.5	4409	3449	5576.5	4119.5	4027.5	4758	4193.25
ADCY8	1206	1762.75	996.75	655.5	817.5	1120.5	1545.75	1491.5	612	1099	692.5	897.5	625	1601.5	1526.75
ADCY9	4426	6822.5	7486.75	6297.75	5523.5	5695.5	6598.5	3998	6949	8700.5	6318	5875.5	7040	4968.5	5157.25
ADCYAP1	1712	1691.5	152	1034.5	1059	2215	158.75	49	1294	1875	17.5	72	64	187.5	148.75
ADD1	9707	9715.75	9955.75	9389.5	10815.5	11483.5	11198.8	11208.8	11403.5	10905	11015	11121.5	11444	11148	10864.5
ADD3	10114	11537.5	11594	11426.5	10681	9612.75	9835.75	9595	9696	10504	10582.5	10158	9712.5	9767	9913.5
ADH1B	631	11046	8711	9043.5	2187.5	639	364.5	436	9376	565	291	389.5	826	299	273.25
ADH4	342	4540.25	9075.25	8670.75	2488	1406	979.25	1061.25	11343	295	1407.5	1413	1432	680	1777
ADH5	8780	10370.5	11048.5	10898.5	10624.5	8486.5	7553	7989.5	8529	8480	8419	8402.25	6053.5	8048.5	8660.5
ADHFE1	2426	4599.5	6422	4657.25	4703	5541	6134	5288.75	8897	2551	4455	7660	3602.5	5875.5	7039
ADI1	8936	10784.2	10914.2	10975.5	11165.5	5687.5	6568.5	5464	9130	7789	7519.5	6856.5	5293	6272	7261.5
ADIPOQ	1387	7602.25	5970.5	3314.75	62.5	2469.5	1785.75	2087.5	2250	1304	2564.5	2590	2572.5	2702	3154.5
ADIPOR1	11207	9350	9252.5	9955.75	9668.5	10147	9890	9636.75	9633	11441	9255	9880.75	9965.5	9307.5	9791.5
ADIPOR2	9279	9247	9037.5	8892.75	10436	9985	10749.8	10128.5	10608	8903.5	10650.5	10625.2	10916.5	10086.5	10298
ADK	7100	9446	8934	9878.25	9755.5	7764.5	7806.5	7679.75	9119	5452	7666	7992	6999.5	8446.5	7442.25
ADM	7928	9250.75	7366.75	9481	7548	10043.8	8472.5	9831.5	9711	6611	9675	9696.75	8890.5	10893.5	11108
ADM2	4761	902.5	642.75	872.75	1365.5	5237	4070.75	4269	4913	4617	3248.5	3004	4267	4215.5	4409.5
ADNP	10127.5	10413.5	10353.2	10422.8	10857.5	8458.5	8659	9004.75	7489	10657	10339	8985	8855	8876.5	9308
ADNP2	5854	6115.5	8480.5	6494.75	9153.25	7749.5	6897.25	7393.25	6968	6605	7815.5	7601.25	6120	7281.5	8334.5
ADO	8790	7319.25	8410.75	8651.5	8633	8430.5	9062.25	9546.75	7602	8360	8927	8646.75	9623	8558.5	9190
ADORA1	3534	3066	3405.25	2105	1427	3832	4182.5	3566.5	3621	4148	2604.5	3803.75	3905.5	4784.5	3196.75
ADORA2B	7254	6572.25	4326.75	4534.5	4286	5411.25	4051	4979.75	3257	6159	5635	4120	3625	6348.5	5520
ADORA3	1737	2064.75	747.75	2461.5	1909	6083.25	3462.5	2827	6406	1393	3044	3820.25	3780	4732.5	3493.25
ADPGK	8798	8892	9238.75	8857.25	9997	8806.5	7600.5	7287.25	8385	8517	7307	7320.5	8222	8517.5	7985.25
ADPRH	3326	2463.5	2435.25	2735	2891	2901	4237	4443.25	4867	2544	4303	4927.5	5154	4425	4880
ADPRHL1	2618	1494.75	1383.25	2071.5	1488.5	2246.75	2239.75	2316	2214	2664	2929	2417.75	1748	2032.5	2407.25
ADPRHL2	5074	7115.25	7925.75	7888	10459	8344.5	9012	9377.5	8389	4341	9288	8864.5	10054.5	9892.5	8920.5
ADRA1A	553.5	1141.75	1190	899.75	298	341	1341.75	2340.25	2704	544	1367	1537.25	2572.5	1314.5	1413.25
ADRA1B	3585	188.5	310	459.75	503	3044.5	3626.5	2673	5937	4219	2138.5	3675	2967	4123.5	2885.5
ADRA1D	2612	408.25	310.75	811.5	591	2641	1344.5	634	2459	2610	692.5	819.5	187	461.5	670
ADRA2A	3756	6326.75	5155.25	5431.75	4613.5	4284	3523.25	3668.75	2937	4472	4377.5	3650.25	3780	3768.5	3391.25
ADRA2B	3082	1585.25	795.5	808.75	1514	3240	4003.25	3460.5	4711	3197	3248.5	3793.25	3412.5	3771	3922.75
ADRB2	2995	8490	6312.75	6092.5	5200.5	4522	4843.5	4718.75	6087	3467	2564.5	5666.5	5131	4148.5	2766.75
ADRBK2	3941	6648.75	6689.75	5366.25	6240	1359.5	1254	603	1460	8837	1635.5	1054.75	2011.5	1100.5	951.75
ADRM1	11234	7901	8212	9106.5	8267.5	10901.5	11035.8	11018.5	10787	11210	10954	10591	11330	11111.5	11081.5
ADSL	10432	9251.5	10269.2	9396.5	10250	11239	11251.5	11216.2	10988	8870	11548	10541.2	11491.5	10532	11373
ADSS	9836	8431.75	8656	8169.5	8541	9853	10223.2	9912.5	9509	8444	10971.5	10349	10556	10288	10009.5
ADSSL1	5797	4050.25	3721	2351.75	5293.5	5191	4990.5	3911.5	6795	7017	5534.5	5390.75	5781.5	5725.5	6175.25
AEBP1	5905	10180.8	10097	9466.75	11142	11078.5	11327.2	10891.5	10918	9956	11516.5	11595.8	11277.5	10919	10999
AEBP2	9124	9073.5	9090	9428.5	7209.5	5679.5	6400.25	5856.75	5039	8187	8496	5166	7611.5	6666.5	6351.75
AEN	6538	2051	1168.75	2718.5	5437	9742	8730	8130.5	9645.5	6659	8629.5	8279.5	9807.5	9258	9398.25
AES	9520	7303.75	8557.25	8751	8064.5	10608	10715.5	10508.5	10297	10529.5	9773.5	10844.8	10887	10648	10485
AFAP1	4014	1746.75	1023.75	1091.5	2624	7344.5	6606.25	6366.5	6146.5	6315	6418	6817.25	5653	7335.5	7160.25
AFAP1L1	5898	4409.25	2356	2607.75	3665	5189	5024.25	5604	4052	5600	7372.5	5295	5611	3368	6201.25
AFAP1L2	2143	3134.5	6093.25	3009	5805	6942.5	4858.25	6867.5	4622	2190	9787	6871	4683	6070.5	7702.5
AFF1	7540	11332	11287.8	10982.2	11279	5150	4713.25	4197	4747	9032	3424	5082.25	3518.5	4304	4730
AFF2	1463	2193.75	951.25	1471	200	1787.5	975.25	1117.25	1981	1706	4212.5	714.75	1432	541	840.5
AFF3	5473	3370.25	6281	3995	4121	5295	7528.25	6382	5424	5087.5	8064.5	6167.25	10494	755	8094.75
AFF4	10726	9956.5	10049.2	9794.25	10169	7089	8704.25	8594.5	5257	10540	8896	8961.5	7857	7648	9072.75
AFG3L2	10777	11194.5	11166	11015.5	10475	9933	10707.5	10573.5	10358	10429.5	10262	10640	10951.5	10462.5	10702.5
AFTPH	8904.5	9723.5	10172.8	10145.2	10225.5	5697.5	8350.5	7581	6907	8480	7501	7456	7611.5	7908	7270
AGA	9489	9511.75	9351	10474	9549.5	6980	7422	6660.25	6685	5943	5471	7314.25	7801.5	8422	6312
AGAP1	7062	4846.75	4932.5	3573	7075.5	7933	7084.25	7941	7528	8524	8225.5	7017.5	8355	7366.5	5962.25
AGAP3	8097	8007	8300.75	7632.5	6800.5	8761.25	8252.75	7882.25	8493	8272	8163	8325	8890.5	8587.5	7832.25
AGBL5	7264	3915	4327	3303	4649	7613.5	7238.25	8408.75	7891	7532	9894	6980.5	8481	7226.5	8487.5
AGER	3228	783.75	229.25	1613.75	2294	1942.25	2574.25	2341.25	3026	2544	2782.5	1899.75	2011.5	2014	2504.75
AGFG1	11325	7133	6273	8247	8802	4920	6894.5	6848.5	4065	11120	6936	5704.5	5903.5	5811.5	6665.75
AGFG2	5855	3985.5	1835.75	3483.75	5015.5	3891	4604.5	3950	4481.5	6296	3843.5	4473.25	4354	3853	4082
AGGF1	6985	8427.25	9363.25	8887	5515.75	7295	7989.5	8216	7701	6584	8614	8289	7611.5	7490	8671
AGK	9670	5276	5239.5	5972.75	6190	8761.5	7879.75	8555.75	7538	8681	9687	8081	7670	7929.5	8744.5
AGL	5764	10048.8	9678	9818.75	6518	7649	8073	7729.75	9034	6197	8576.5	7746.25	9441.5	7068	7362.25
AGMAT	3206	1497.75	3536.75	1740	1961.25	2698	2478.5	2166.25	7311	3219	3294.5	2131.5	3225	2968	3331.25
AGPAT1	10384	7328	9136.75	8594.25	7802.5	8428.5	9041.5	8764.75	7890	11101	10502	9848.5	9328.5	9779.5	8921.75
AGPAT2	8529	7218.75	9364.5	7406.5	4140.5	7805	8310.5	8640	9891	9314	7372.5	8269.5	10431.5	7808	8337.5
AGPAT3	9050	5964.5	8017	8918	8790	4112.5	2763.75	3072.75	4476	10003	1497	3154.5	3312	2221.5	2877.5
AGPAT4	2739	2975.25	1172.75	2130.5	3436.5	3473.5	2766.75	2871.75	3561	4273	4049.5	2071	2539	3263.5	2960.75
AGPAT5	6263	5756.25	6865.25	6221.75	6268.5	4624.75	5885.75	4889.25	3279	7195	3674	4627	2995.5	3794.5	4344
AGPAT6	11240	6625.25	7832.25	7527.5	10135.5	5258.5	5679.25	5516	5649	11622	4430	5306	4541	5533.5	4797.5
AGPAT9	9649	3693.5	1637.25	4882.5	4023	4512.5	4902.25	4159.25	5435	7471	913.5	4392	6008	3951.5	2575.75
AGPS	10589.5	6281.5	7077.5	5865.75	6902.5	7792.5	7853.75	7391.75	7040	10446	7626.5	7969.75	8202.5	7124.5	8236.75
AGRP	5643	526	1027.5	1772	485	1289.5	1307.5	793.75	2086	6048	363	444.25	1257.5	1565.5	1188.75
AGT	2138	3172.75	2808	1740.25	2082.75	2216.5	1872.25	1948.75	11077	2068	7014.5	1184.25	1351.5	5559.5	2728.25
AGTPBP1	8208	7563	7003.25	7016.25	5376	6271	6743.25	6700.5	5096	7100	6651	6257.5	8008.5	6652.5	6205
AGTR1	836	9513.75	6294	5172.5	2619	1501	2204	2647.25	5675	929	3216.5	1278.75	1652.5	1901	2294.75
AGTRAP	8654	5833.25	6374.75	7085.25	6249	6537	7234	7309.75	6170	9134	6116	6751.25	7725	7793.5	6262.5
AGXT	3418	147.75	1697.5	1318.5	448.5	990	2018.5	861.75	11521	3845	656	1382.5	2967	1187	941
AHCTF1	7424	7108.25	7323.75	6566.5	8109.5	7262	8024	6850.75	7776	7876	9240.5	7906.25	8080.5	7144	7924.25
AHCY	10576	7067.75	8958.5	8081	9637.5	11017	10677.2	11304.8	11041	10443	11707	10930.8	11360	11067.5	11072.2
AHCYL1	10781	11187	11199	11060.5	11054.5	10711	10988.2	10888.8	11067.5	11005	10563.5	10899	11326	11065	10606
AHCYL2	8840	7440.5	10509	6833.5	6836	6426.5	9206.5	6713.75	6193	9423	7860	10098.8	9052	6112	5405.75
AHDC1	5060.5	3863.75	3463	2777.5	2758	3712.75	4674	3565.75	3493	6347	3570	4097.75	4498	4145	3222
AHI1	5856	7835.25	7618.75	6539.25	9538.5	5821.5	6331.75	5359.75	7215	5126	6208	6466	7103	7030.5	5159
AHNAK	7330	11717	11708	11606.5	11508.5	10728.5	11039.5	10952	11195	8273	8377.5	11150.8	10871.5	11138.5	9636.25
AHNAK2	6321	11613	11422.5	10462.5	10770.5	6153.5	6011.75	3325	6147	3392	1879.5	4039.25	10505.5	10925	5899
AHR	8695.5	10550.8	10493.2	10575.5	7846.5	11571.5	11495.8	11431	11722	9107	11503	11427.5	11499.5	11551	11627
AHRR	6925	5888.25	6565.75	6407	3313	1025.5	847.5	629.75	857	8958	192.5	698	1520	481.5	608.75
AHSA1	10278.5	9465.5	8711.75	9560.5	10233.5	9812.25	10138	9947.5	9262	10508	10870	10450.2	10193	10504	10375.2
AHSA2	5466	9191	8123	9437	8316	6908.5	6247	6674.25	7828	4371	7190	6185.75	7233	7850.5	7963.75
AHSG	1022	1526	2915.75	889.75	998	2632.5	537.25	368	11314	1018	505.5	212.25	1217	154.5	689.5
AHSP	364	1266	2225.75	2130.75	514	1462.5	2413	3092	2306	397	3628.5	2618.5	2896.5	2759.5	3314.75
AIDA	99	11246	11231	11080.5	11411.5	3278.5	10919	11005.5	3068	178	10848	10979.5	10823.5	10972	10770.8
AIF1	712	7764.75	1001.5	8342.5	9117	9693.5	9507.75	9053.25	10151	706	8818	10501.8	8791.5	10492.5	8242.25
AIF1L	6590	7459.25	9296.25	4385.75	10212	6917	11185.2	11310.8	8550	5443	11670	11398.2	11624	11122	11382
AIFM1	8317	5361.75	4374.25	5364	7108	9535	9621	9633.75	10734	7288	9183.5	9330.5	10505.5	9272	9755.5
AIFM2	5145	3802	4196.25	2948.75	3963.5	3335	3206.75	3124	2786	5150	2138.5	2816.25	3054	3094.5	3231.75
AIG1	4135	7589.25	7542.5	5713.5	8537.5	6304.5	4185.25	5911.75	8658	7523	5430	5634.75	4050	5200.5	6652
AIM1L	2613	4584.25	3264	2912.25	4070.5	862.5	1469.5	662	1190	2626	1826	1120.5	47	1269	1220
AIM2	1792.5	1608.75	2287	4445.75	2263.25	4277	5682.25	4688.25	3176	699	3399	6986.25	4683	9819	4182
AIMP2	9711.5	8933.75	9107	9331.5	11432.5	10563.5	11026	10877.8	10786	9670	11034	10601.8	10925.5	10462.5	11209.8
AIP	8138	7189.75	8435.5	7711.5	7851.5	9424.5	9110.25	9303	9239	8669	8958	9207.75	9411	9671.5	8534.25
AIRE	4598	1080.25	814.75	1487	786.5	11705.5	11622.5	11599.5	11757	4632	11647	11632	11668	11635.5	11720.8
AJAP1	1167	676	763.25	819.25	454	2277.5	2871.75	2661.25	3173	1242	4927	2424	3023	1979	2552.25
AK1	7389	7190	7570.75	8005.5	8665.5	6747.5	6397.5	6785.25	7003	7609	5142.5	6061.25	6766.5	5649.5	6551.5
AK2	10644	8657.75	7722.25	9375.25	10053.5	10853	11317	11259.8	10993	9349	11112.5	11182.5	11323.5	11030	10812
AK3	9244.5	11526.5	11402.5	11495.5	9403	9447	8805.75	10087.2	10799	11115.5	9905	9339.25	9261.5	8842.5	8444.25
AK5	3055	1778.75	723.75	2793	2528	1277.25	1216.5	2374	879	5680	692.5	1598.75	554	1769.5	757.75
AKAP1	7624	9032.25	9218	8553.5	9020	4979.75	5351.75	4895.25	5652	6476	5851.5	4886	5293	4145	5029.25
AKAP10	7311	7732.25	8086	7617.75	8110	3593.75	3506.5	2898.5	2906	7968	2987	2770.5	3279.5	2567.5	3476.25
AKAP11	7675	10150.5	9945	10400.5	7773.5	8381	8704.25	8717.25	6985	7909	8786	8791	9411	8692	8619.5
AKAP12	5781.5	8297.75	8173.25	7043	6172.5	6045.5	4039.25	5363.25	6097	6759	7053.5	7243	3251	7451.5	5858.75
AKAP13	6526	9605	8491.75	8668.25	9215.5	9439.5	9062.25	8473	9217	7949	8028	8888.75	8464.5	8646	9180.25
AKAP3	1361	353.5	495.5	263	658	2058.5	863	711.5	3336	1282	291	411	223	680	782.75
AKAP5	361	937	1452	887	2546	11729	11785.5	11780.8	11780	469	11778	11778.2	11789	11786	11806.5
AKAP6	2699	1950.5	2324	1388.5	1061	1267.5	1257.5	1065.5	913	2080	962	2744.75	1652.5	2403	3502
AKAP7	3931	4758.5	6264.75	6060.5	6420	6206	7012.75	6913.75	7596	3586	6340	7858.5	7670	6680.5	8175.5
AKAP8	7800	6819	6989.25	4766.5	10015	7735	6795.25	6466.75	7412	6940	7417	5918.75	7422.5	7322	6890.75
AKAP8L	8955	4921	4771.75	4609.25	2466	6015.5	6079.75	6637.5	7062	8875	6564.5	5984.75	6073	6989.5	6139
AKIRIN1	9375	5560.5	4827.25	6446.25	6800.5	8321	8319.75	8318.5	8577	9461.5	7501	7400.25	8448	7464.5	6379.5
AKIRIN2	7209	5646.5	5050.25	7449.5	7048.75	9339	9012	8961.5	8988	7536	8513.5	8971	8836	8127.5	8623.25
AKNA	3771	3919	5698.25	7146.25	6266.5	6664	7200	6353.25	5980	4048	6139.5	6653	5884	6604.5	5166.5
AKR1A1	3312	10367.2	10011	10854.2	11168	11039	10810.2	11035.8	11409	3043	10483	10681.5	11263	11104.5	10734.5
AKR1B1	9937	7979.25	8807.25	9309.75	10598.5	10830	8821.25	10866	10432	8943	6695.5	10374	7316	10743	9829
AKR1C1	1464	11418	10225	10948.5	10166.5	185.5	285.75	110.75	418	530	60	192	72.5	44	43.25
AKR1C2	769	11274.5	9814.5	10405.2	10011	1917	1940.5	2826	10941	557	3216.5	1230.75	826	1140.5	1262.5
AKR1C3	621	10848.5	8948.5	9340.5	7823	5133	3580.75	4896.75	10490	416	3600.5	2519	2468	4035.5	2270.25
AKR1E2	3478	517.5	821.25	1272.75	1960	1055.75	1886.75	1006.25	514	2660	1971.5	774.75	1558	749	1105.25
AKR7A2	9427.5	9495.75	8881.75	9616.25	8769.5	11010	10392.5	11066	11228	10064	10862.5	11042.8	11120	10792.5	10620
AKR7A3	5360	4912	3343	4680.5	2637	8525.75	8219.5	9334.75	11128	6342	8661.5	9049	9022.5	8446.5	7965.5
AKT1	10367	6252.75	8515	7315.75	6726.5	11019	11073.5	11026.8	11057	11226	10510	11106.2	11263	11184.5	10857.5
AKT1S1	7215	3364.25	4718.75	4591.25	3789.25	3299.5	4434.5	3797.75	2047	7780	6294	3006.25	4950.5	4667.5	3788.75
AKT2	8362	6186	7377	5904.75	8772	2283	1710	883.25	1068	9415	2183	970.75	475.5	238.5	1215.25
AKT3	8016	6051.5	9122	8321.25	10465	2713	3869	3082.25	2760	9902	2523	3087.75	3625	2898.5	4307
AKTIP	3282	8318.25	4381.5	8783.75	5171	7750.75	7758.75	7917.25	7774	2881	6359	7458.25	6790	7463.5	7081.5
ALAD	5813	8285.5	6991.75	5893.5	6512	7325.5	7743.25	8310	8038	5461	7482	8295.5	6942.5	6934.5	9026.75
ALAS1	8516	7969	5225	8475.25	6762.5	4343.5	4082	4188.5	4440	8554	4212.5	4022.5	3754	4178	3607.75
ALAS2	1544	867	2075.5	749	690.5	640.75	2266	1556.5	2047	1532	2414	1615	2268.5	1749.5	2777.75
ALCAM	8769	10160.2	9870	10240.8	11226	5538	6814.25	6774.75	7445	9155	8996.5	5724	5653	6975	6964.5
ALDH16A1	5913	3967.5	3850.5	4121	3577	5457	5685	5178.75	5212	5838.5	6139.5	4941.5	5967	5984.5	5182.5
ALDH18A1	11319	8615	6896.5	7066.25	7401.5	9188	8678	9187.5	8434	10566	9573	8480	9261.5	8790	9233.25
ALDH1A1	3959	7763.25	4941.5	9388.5	5544.5	7927	10768.8	7814.75	10277	1613	6915	10488.8	11390	6112	7887
ALDH1A2	805	1302.5	854.25	323	706.5	3008	4572	3238.25	3375	1124	3724	2327.25	11132.5	4127	3111.75
ALDH1A3	6128	4773	8016.75	7041	6852.25	9443	6955	10016.2	7181	9977	8064.5	9718.5	8552	9814.5	7154.25
ALDH1B1	7961	1478.25	5198.5	2220	8921.5	5475.75	6649.5	6645.5	7719	6443	8082.5	5059.25	9905	5317	7761.75
ALDH1L1	2424	4652.75	5535.5	3987	1609	895.5	1135.25	370.25	11129	2400	363	343.5	1126.5	1291	390.75
ALDH2	3001	11536	11255.5	11385.5	10840	7580.5	5469.25	6096	10205	5106.5	9585.5	5747.75	5631.5	6304	2158
ALDH3A1	2599	5856.5	4396.75	6012.25	3643	1371.5	1469.5	729.25	1507	2638	471	972	1558	1354.5	1322.25
ALDH3A2	8035	11211.8	11189	11133.5	9522	8501.25	8870	8645.25	10292.5	9265	7245	9851.5	8890.5	8577	8422.5
ALDH3B1	4742	3400.75	4288.5	3995	3960	5965	5826.75	4530.5	6616	6794	3351	6338	5154	7463.5	4466.25
ALDH3B2	4121	9950.5	9858.75	11110	11426	1326	3073	4749.5	1565	1726	771.5	6726.75	6834	2032.5	2436.25
ALDH5A1	3531	7284.25	4426.5	7216	5905.5	4931.5	1973.5	4402.75	7901	2600	6399	6211.75	1040	3052	4147.25
ALDH6A1	5566	8069.25	7208	6360.5	9786	7226	7275	7615.75	10468	6959	5306	9388.25	7857	7242	8150
ALDH7A1	9427	9192	9114.5	10145.2	10185	9829	6518.5	9932.5	10549	8561	9773.5	10313.2	4930.5	9642	9910.25
ALDH8A1	1562	1928.5	2419.5	999.75	1253.25	2599.5	2387.75	2543.25	7924	1791	2414	2880.5	2268.5	2867.5	2598
ALDH9A1	10440	11387.8	11253	11235.5	9459	11467.2	11413.5	11544.2	11514	10878	11642.5	11567.2	11672.5	11481	11528.2
ALDOA	11666	11518.5	11604	11645.5	11566	11554.5	11448.8	11586.2	11341	11719	11544.5	11492	11574	11486	11491.2
ALDOB	1061	2664	4557.25	2962.5	916.5	2303	1633.25	2330.5	11693	978	1635.5	2486.5	3023	2631	2497.5
ALDOC	7664	6938.25	6664.5	6288.25	5328	9020	7741	9056.25	9108	6941	9708.5	8376.25	7744.5	9606	9820.5
ALG1	8528	2728	2325	2266.5	2955.5	4961	4975.5	4831.25	3355	9320	4212.5	3965	3754	3529.5	4375.75
ALG12	7258	2250.5	1841.5	1901.25	3339	3393.5	4049	3673.75	3309	7664	4793.5	2972.75	4202	3454.5	3755.5
ALG13	5420	9189.5	8316.5	7233.25	8624.5	8389.75	9378	9483	8056	5496	6418	9316.25	10148.5	9658	9880
ALG14	8418	7188.75	7680	7010.25	7197.5	6135	6561.25	6410	5502	6040	6071	6621	6008	5442.5	6305.25
ALG2	9528	8361.75	7881.75	8551.75	9404.5	2917.5	3126.75	2761.75	2322	8868	2564.5	2479.25	2508	2099.5	3165.25
ALG3	11053.5	5292.75	4905.5	4778.75	6485.5	10008	9858.5	9757	9208	11187	10078.5	9296	8719	9557.5	10329.5
ALG5	6978	10226	10646.2	10785.5	9388.5	9472	9370.5	9933.75	9764	5639	10005	9767	9782	9658	9807.5
ALG6	6350	8295.25	8500.5	8756.25	7234.5	7746.5	8734.5	8748	6770	5861	8122.5	7933	9294.5	7648	8244
ALG8	11021	7038.75	7310.75	8435.25	7912	10022	8818.75	9796	9957	10004	10281.5	9035.5	8907	9684.5	9260
ALG9	9655	6152	5812.5	5655.25	6804	8073.5	8413	8991.5	8853	9288	8007	8660.5	8298	8676.5	8620
ALK	2528	1080.25	2946.75	1159	1607.5	3547.5	3402.5	4728	2729	2301	3017	5608.5	4723	6183.5	4602.5
ALKBH1	5949	6393	5614	5995.5	4538.5	5954	4820.5	4946.25	4159	6101	5089	5088	4611	5043	5537.25
ALKBH2	6221	4788.75	6703	5468.75	4408	7487.5	6809.25	7634	7707.5	6288	8942.5	6736	6834	7941.5	8087.5
ALKBH3	8926	5655.25	4826	5910.5	8693	8406	7525.75	8607.5	8498	8112	7459	8214.75	7316	7627	7369
ALKBH4	4229	2945.5	3667.5	2718.25	2642.5	4596.5	4113.75	4175	4608	4376	5889.5	4163.5	4078	4304	4828.5
ALKBH5	8460	8816.5	9653	8940	11016	11533	11467.2	11443	11514	9948	11466.5	11509.2	11560.5	11147	11494.2
ALKBH6	8100	5554.75	4964.5	6487	5828.5	7177	7676.5	7318.75	7052	7769	6803	5928	7650	7387	6918.25
ALKBH7	3229	7984.5	8162.75	8819	6014.75	7848	8838.5	8751	8400	3410	7702	8510.75	8499	7211.5	8359.75
ALKBH8	4818	2806.5	3007	2994	4927.5	3215	3277.25	2895.75	4368	3260	3112.5	2108	737.5	1866.5	1918.5
ALMS1	6841	7694	8482	5203.5	4446.5	3370.25	3662.25	3722	3650	5623	3953	3464.75	3054	3669.5	3689.75
ALOX12B	2237	6914	2858.75	6119.5	5199.5	598	419	251	924	2212	337	291	247	228.5	911.25
ALOX15B	3366	5491	4187	9577.25	4433.5	2163	3899.5	3781	2884	3538	4321	4818.25	3602.5	2462.5	2539.5
ALOX5	1379	7469	3147.5	6804	3563.5	9139	7197	7535	7686.5	1340	4124.5	7527	8258.5	9207	6231.25
ALOX5AP	1226	7178	4947.5	9782.25	2818.25	10049	10572	9276	8091	1243	5686	9418.5	10065.5	11340.5	9664
ALPK1	4753	4375.5	5992	2518	5870	5525.5	4858.5	4819.75	5996	4727	3017	5420.25	5541.5	5154.5	5141.5
ALPK2	517	2495	1210.25	1923.5	2637	3038.5	1818.25	2623.5	7190	646	505.5	1308.5	1931	749	1359.5
ALPL	2261	1341	2839.5	887.5	1249.5	6802.75	5049	6000	9530	2371	9014.5	6959.5	4428.5	4972.5	4438.75
ALPP	1760	44.5	79.5	43.5	1389.5	11351	11137	11159.2	11714	1508	11263.5	11327.8	11436	11301	11582.5
ALS2	4756	7158.5	7338	7120.25	7317	8092	7786.75	8305.75	9305	6926	9081	8287	8008.5	7718	8547.5
ALS2CL	2988	8407.25	8843.5	6517.75	6256.5	1464.25	1740.5	1809.5	1198	3400	771.5	1862.25	1432	1796	1864.5
ALS2CR11	1612	1024.25	1023.75	640.25	1046.5	1326.5	851.25	853	272	1178	2330	1104.75	737.5	3454.5	1822.5
ALX1	8934	2143.25	7907.75	5523.75	7273	7552	8438.5	7495.5	8015	8590	8438.5	9410.5	8773.5	6272	6531.75
AMACR	6545	363.5	2226	946.5	3011.75	4528.25	4374.75	4026.25	3327	6836	3971.5	4496	3648.5	4596.5	5419
AMBRA1	5578	4304.25	6470.25	4686.5	5907.5	2993	3517	3173.25	2326	6865	3323	3017.5	3602.5	2733.5	2378.5
AMD1	11231.5	9082.75	10263.2	9635.5	10032	10018.2	9972.75	9404.75	9287	10770	9882.5	10420.5	9472	10542	10006.5
AMDHD1	2232	1417.5	1697.25	1036	1956.5	2248.75	1858.5	1790.5	8210	2528	1125.5	2027.5	1126.5	1002.5	1793
AMFR	9460	4828.25	5911.75	4789.75	3499	9189.5	8514.5	8024	7759	10146	6606	7793.25	7060	6809.5	8367.5
AMHR2	1665	525.5	679.5	241.25	700.5	787.5	919.5	313.25	1977	1815	6318	535.25	625	326	843
AMICA1	378	4599.75	906	7228	5461.75	5943	5980.75	5159.75	5980	358	3570	6000.75	5353	4803.5	3874.25
AMMECR1	7138	8597.75	7938	8392	8822.5	5934.5	6755.5	6835.25	5027	6957	6540	6297	8239.5	7196	6607.25
AMMECR1L	8391	8489	9577.75	9168.5	8867.5	8000	7638.25	7854.25	7513	6966	8629.5	7514.5	10002	7868	7484.75
AMOT	5351	1883.5	1559.75	1460.5	888.5	5564.5	6439.75	8658	6160	3308	6651	5778.5	7019	5772	7109
AMPD3	2499	7427	4955.5	6039	4582.5	2648	1871.75	1400.25	1727	2585	2414	1641.5	2737.5	1269	2173.5
AMPH	3323	1732.75	2292.75	2166.75	1237	3144.5	1426.75	3073.25	2875	2133	397.5	4931.5	1748	1866.5	985.25
AMT	2982	6821	7299	5587.75	4893.5	6262.5	3993	4512.75	8650	3138	4355.5	4964.5	3955.5	5943	5174.25
AMZ2	9241	10648.5	10572.8	10643	9291	10669.5	11123.8	10903.2	10666	9325	10669	11147.2	11323.5	10868.5	11057.8
ANAPC10	4881	6259.25	4984.5	5879.25	5374	6946	6749.75	7617.25	7012	4339	6515.5	7387.5	7316	6570.5	7406.5
ANAPC11	5338	10490.5	9834.5	10355.8	10594.5	10044	10758	10790.2	10102	3886	10432	10683.8	11029	10872.5	10731.2
ANAPC13	11354	11064.5	11174.5	10824.8	10534.5	10968	10987	10945	10661	11263	10947.5	11030.2	11126.5	10905	11091.5
ANAPC16	7719	11131	11138	10908	11278	6994	6953.5	6091.5	7324	7226	5729.5	6445	6462	6387.5	6668.25
ANAPC2	4695	5357	5078	5028.75	3049	2904.5	3181.5	2604	2392	4636	2707.5	2542.5	3625	2667	3255.75
ANAPC4	7574	9940.5	10395.2	9925.5	10584	8343.75	8542.5	8111.5	9248	7059	8419	8586	9164	9000	7966.5
ANAPC5	10212	11320.5	11348.5	11252.5	11148	10991	10880.8	10703	11120	10145	10294.5	10665.8	11044	10616.5	10921
ANG	2902	5632.5	2637.25	2431.75	5363	8340	9486.25	8209.75	11672	3972	4544	9973.5	9228	9779.5	9864.75
ANGEL1	5745	4133.25	4456.5	5234.25	6714	6844.5	6427.75	6270.5	7473	6741	6782	7879	6652.5	6005	6632.5
ANGEL2	8161	8901.5	9099.25	8551.5	8213	9042.5	7669	8648.25	9103	7835	9977.5	9113.75	9194.5	9031	9321
ANGPT1	2354	2898.75	5190.5	4178.75	1686.5	3787.5	3603.75	3291.25	3581	867.5	2746.5	4741.5	3225	6224.5	5559.75
ANGPT2	1006	3233.75	3856.75	3360	3674	4341.75	3361.5	4110.25	4112	971	4020.5	5092.75	3983	5532.5	5295.5
ANGPTL1	517	8345	6565.25	5088.75	2347.5	400.5	315.25	353.75	402	439	162	623	268.5	187.5	540
ANGPTL2	8578	9558.25	8668.25	8369.25	7452	7755	7395	7803	7825	6078	6496.5	7609.5	7706	6366.5	6370
ANGPTL4	3067	3458	2360	3898.75	4188.5	7184.25	6052.75	9125	9161	3484	6997	9796.5	7611.5	8781	8602.75
ANGPTL6	3701	930.5	1068	825	2420.5	2127.75	2745.75	1413	4749	3801	267.5	2637.25	1931	2466.5	817.5
ANGPTL7	1108	1226.5	4203	990.5	4094	1417.25	2588.25	1322	1360.5	1173	3724	5811	5471.5	9011.5	2841.25
ANK1	1874	2344.5	3229	1960.25	1076	1279.5	1134.25	704	3139	2298	471	311	475.5	1405	1081.25
ANK2	3691	9920	10839	9802	9304.5	4097.5	4749	4844.75	3369	4707	3514.5	5527.75	6241	4667.5	3195.25
ANK3	2293	10855.2	9607.25	9579	7311	1835	2061.75	2095.75	3049	700	619.5	1520.25	949	2245	1711.75
ANKDD1A	3912	3958.5	5188	3508	4764	6942	5467.75	6316.25	6188	4766	7894.5	7328.25	6701	8256.5	6379.5
ANKFY1	9323	10230	10196.5	9161.75	9396.5	8555	9272	8848.5	9286	9721	10212	10006	9767.5	9279	8534.75
ANKLE1	2760	81	100.5	648.25	428.5	3533.5	2085.5	2005.25	3126.5	2984	3112.5	1635.25	2875	2165	1873.75
ANKMY1	3623	2426	2724.5	1743.75	3344.5	6289.5	4803.5	4636.5	6488	3530	4237.5	6021	4930.5	5584	5274.25
ANKMY2	6501	9637.25	9524	9459	6767.5	7340.25	6394.25	7794.75	7384.5	6354	8729.5	7836	6309.5	7400	8052
ANKRA2	3945	8354.5	8647.5	8516.75	4451.5	6953.5	5712.75	6650	7863	4047	7417	7516.25	6167	6953.5	8592.75
ANKRD10	9107.5	9022	9625.25	9505.25	11509.5	8788	8254	7603.5	8977	8378	6915	8402.5	8258.5	7573	8064.75
ANKRD11	5989	7928.25	7306.75	6987.5	7885	9489	9617.5	9351.75	9091	5827	10378	9034.75	10138.5	8989.5	9965
ANKRD12	3117	8432.75	6276.75	8242.75	6020.5	6468	7849.75	6568.5	6718	2730	6399	7729	5986.5	6809.5	6199.25
ANKRD13A	9274	10926	10663	10702.5	11517.5	9559.5	9327.5	9389.5	9536	9429	9613.5	9924.25	8279.5	8923	8581.25
ANKRD13B	4936	2715.5	4153.25	3426.75	5313	2129.75	2758.75	2248.25	1252	5529	3216.5	2009.75	2192.5	1901	1999.5
ANKRD13C	7560	6577.25	5774.5	6509.25	7065.5	4877	5307.25	4573.75	2904	8638	3888.5	4592	5422	4944	5016.25
ANKRD16	4754	4396.5	4859.25	4759.5	2784.5	5946.75	6252.25	6017.5	6542	4489	6116	5640	6676	5996.5	5615.75
ANKRD17	9949	7602	8453.5	8328.5	5639	8193	8455.25	8067.5	6724	9984	7915.5	8288	8719	7487.5	8185.5
ANKRD22	60	9883.25	9010.75	10518.8	6693.5	3620.5	6441.75	4552	3269	76	3994	6617.25	5760.5	6826	4268
ANKRD23	4860	2897.5	3637	2861.25	3078	3027	3950.25	2657	3480	5179	3151	2702	5293	2389	3031.5
ANKRD26	2237	2526.25	832.25	2821	1807	2515.5	3691.75	3261.75	3285	1816	3151	3608	4078	3312.5	4088.25
ANKRD27	9874	9298.5	9384	9357.25	8880	4447	5007.75	4659.25	2990	7785	6844	4809.5	4587.5	4304	4211
ANKRD28	11073	10022.2	11070.5	11014.5	8880.5	7530	8687.25	8055.25	7583	11203	7307	8998	8791.5	7845.5	8292
ANKRD29	548	6011.75	4424	4818	3401.5	3333	1940	3118.5	1955	746	1681	2443.25	998	4256.5	573
ANKRD32	5056	4214	4002.75	5977.25	3229.75	3909	5208.5	5154.5	3841	3129	5492.5	5189.5	4816.5	4170.5	5246.5
ANKRD35	1410	8836.75	7125.5	6050	5077.5	3405.75	3435.5	3474.25	4007	1461	3628.5	3217.25	3648.5	3433	3364.75
ANKRD36B	8976	4840.75	8041	8097.25	4985.5	5070	5507.25	4002.5	6299	7731	3374	4122.5	4202	2742.5	2899.25
ANKRD37	4861	8053	7639.25	7379	7587	6950.5	7538.5	5797	6446	3915	5327	7695.5	8977.5	6337.5	8118.5
ANKRD39	8279	3098.5	3780.25	3851.75	2862	7921.5	10404.5	7696.25	7460	8153	7372.5	7528.75	10567.5	7335.5	7425.5
ANKRD40	9128	6920.25	8560.5	7032	10987.5	3217.5	6063.75	5878.5	3930	10401	5872.5	6544.25	6053.5	5412.5	6029.25
ANKRD46	6063	7889.75	8326.25	7833.25	7329	7080	6266.75	6713	7706	5270	10527.5	7186.5	7275	7083	7020.25
ANKRD49	7044	8247.5	8210.75	8376.25	6846.5	6135.25	6030.75	6035	5689	5789	6023.5	6134.75	5631.5	6046	5705.75
ANKRD50	9440.5	10584.2	10681.5	8787.5	6244.5	7615.5	6789.25	7341.5	5605	10740	8064.5	7839.75	6632	7509.5	7215.5
ANKRD54	8129	4639.25	7024.75	5022.5	7018	8846.5	8598	7737	8166	7406	8496	7382	10474	9262	8113.25
ANKRD55	544	1811.5	3008.5	2404.25	874	662.5	552	1040.75	1685	543	177.5	635.5	147.5	447	640.5
ANKRD6	4884	4208.25	3567.25	3253.75	4927.5	6035	4876	4914.5	6120	5500	3910	5005.25	5945.5	4485.5	5254.25
ANKRD9	3896	8322	7801.75	7537	8416	9484	9842.25	9616.75	10092	3927	8204.5	9741	9979	9691	9901.5
ANKS1A	8533	9737.5	10541	9412.5	7179.5	10398.5	8573.5	10633.5	9848	8409.5	10405	11140.2	8873	8946.5	10977.5
ANKS1B	671	2331	2409.75	1945.5	1177.25	1512.5	3482	4515.75	2879	602	2138.5	1791	4703	1874.5	1063.25
ANKS3	3779	2586.75	2231	2204.75	2776.75	3644.25	3286.25	2803.5	2777	3848	3273.5	2105.5	3805	3147	4042
ANKZF1	5267	6156.25	5630	6229.75	7181.5	5975.5	5525	5536.75	6891	4434	5961.5	5409.5	6879	5204.5	6400.5
ANLN	11465	4327.25	4658.25	5855.75	5335.5	6037.75	7045.75	7154.5	4599	10927.5	8477.5	6000.75	6942.5	6423.5	7707
ANO1	1918	9413.75	7032.25	5864.25	978.5	5733.5	3321	4402.25	6914	1316	4977	2864.5	4768	3348	4396.5
ANO10	8519	6153.5	4579.75	5236.25	5291	5985	6480.5	6085.5	5127	10357	4977	7148.25	6578	6725.5	5382.75
ANO2	1161	885.75	1256.25	572.25	664.5	1754	1763.75	2249.75	1267	1051	913.5	1377.75	2380.5	2365.5	2367.5
ANO3	339	626.25	1466.75	737.5	211.5	451	229.25	633.75	293	365	619.5	1030.5	147.5	249.5	658
ANO4	2930	734.75	2284	1512	308	2249	900.25	1914.25	1839	4691	1022	1203.5	737.5	4892.5	3158
ANO5	634	1431.25	1674.75	195.5	985.5	604.5	91.75	430.75	746	3690	267.5	959.25	322.5	216	514.75
ANO7	3720	566.75	1016.5	645.25	624	3291	2731.75	1856.5	2874	3946	2414	1905.75	2380.5	1188	2096.25
ANP32A	5455	8765	10452.2	9654	10038	3770	3879	4063.25	3748	5402	4544	3394	4104	2898.5	5086.5
ANP32B	4668	11556.5	11538	11406.5	11611	11553.5	11528.5	11546	11485	3888	11379.5	11557	11585	11458.5	11684.8
ANPEP	1913	7452.5	5282	5126.25	4856.5	3808.5	4943.75	3799.5	9025	4482	2564.5	3811.75	3225	3438.5	3934.25
ANTXR1	9564	11213	11067	10722.8	8341	9889	9694.75	9908.75	8775	10519	6093.5	10600.8	9937	10222.5	9630.75
ANTXR2	4739	8569.25	5904.75	8534	6433	6893	7080	6790	8455	5738	4078	7006.75	5315	9511.5	5762.25
ANXA1	11641	11700	11597	11533	11225	11211.5	11580.8	11447.2	10510	10105	7646	11593.5	11150.5	11459	10997.2
ANXA11	10148	11189.5	10743.2	11115.8	9443.5	8413.5	7938.75	6370.25	7863	11404	6003.5	7328	6595.5	7120.5	6224.25
ANXA13	519	129.5	107	95.5	126.5	1057.75	2042.5	1797.25	3545	495	729	2312.5	3023	1769.5	2022.25
ANXA2	10980.5	11781	11765.5	11771	11800	11648.5	11693.2	11731.5	11656	11103	11457	11630	11624	11725.5	11658
ANXA2P1	5203	1947	2009.25	1198.75	2259.5	10852.5	10369.2	11159.8	11212	5974	10199.5	10858.5	10663	11136.5	10880.5
ANXA2P3	1766	3731	3351	2779.5	261	3535.75	4210	4557.75	3015	1887	2604.5	3482.5	3312	4826.5	4100.5
ANXA3	3253	7215.5	4500	5280	4798	839.75	672.25	1039.25	2151	1501	1971.5	4144.25	223	1479.5	5726.25
ANXA4	9744.5	11090.8	10729.8	10887	10627	3933	5206.25	4131.5	3962	9313	4772	4717	3577	5204.5	4036.75
ANXA5	11798	11424	11678.5	11486.5	11187.5	11595.5	11703.8	11676.8	11518	11803	11692.5	11670.2	11695.5	11486	11662
ANXA6	11356	7712.25	9030.5	7616.25	9119	5860.5	4474.75	4623.75	6468	11549	5430	5371.5	3054	6045	4810
ANXA7	9348.5	10802.5	10733	10974	10134.5	10022.5	9392.25	9431.25	9709	8969.5	9116	9721.75	9082.5	10162	9349.5
ANXA9	2375	4841	1765.75	3858	3555.5	1401.5	2054	2190.25	2420	2259	3424	1950.75	2100.5	1818	2194.75
AOAH	353	2515.75	2720.75	3982.75	3344.25	4567	5158	3977	4625	393	3933	5212.25	3549.5	4713.5	2929.25
AOC3	1236	7254.5	7915.75	4173.5	2523	2052.5	3223.25	2921	4865	1362	1320.5	2808	2307.5	3172	2585.5
AOX1	748	9147.25	6218.25	8127.25	2450.5	1714.5	1071	1187	10163	815	3374	634	377.5	1092.5	418.75
AP1AR	7311	5012	4758.5	5583	4336	2525.5	2786	2776.25	1352	6185	3017	3191.75	2229.5	2207	3402.25
AP1B1	9321	4323.5	3985.75	5062.25	5787	9689.5	8918.75	9401	8950	9891	9518.5	8552.25	8855	8781	9072.75
AP1G1	10940	9171.75	9750.5	9220.75	9820.5	6902.75	6821.75	7334.25	7510.5	10973	7329	5980.5	6288.5	5062	7266
AP1G2	4843	8078.75	7638.5	7243.25	8215.25	6410	6089.75	4310.25	6534	5827	5594	6217	6942.5	6239.5	4776.5
AP1M1	9216	6625.75	7146.75	7536.5	6221	10551	10218	10524.5	10438	10264	9750	10249.5	10385.5	10475.5	10208.8
AP1S1	10867	4845.5	5710.75	5819	5895	9233	8568	8797.5	7394	10712	8528.5	7651.5	8568	8892	8424
AP1S2	9334	10027.8	11521.8	11328	10816.5	11361	11543	11722.5	11490	9130	11099.5	11623	11692.5	11681	11625.2
AP1S3	5498	1253.25	911.25	1324.75	2248	494	1897	1364	586	5240	337	616.5	868.5	1447.5	922.5
AP2A1	8114	2721.75	3658.5	2659	3383	4874	6688.25	5832	5636	9743	7138.5	5822	7171	6555	5630.5
AP2A2	8078	8608	8402.5	8347	6371.5	5058.5	5608.75	5030.25	5554	10088.5	4793.5	4542.75	5198.5	4467	4469.25
AP2B1	11324	6375.5	8013.75	6111.25	8212.5	6052.5	5813.5	6077	4216	11392	8007	5911.5	5270	5627	5316
AP2M1	11524	10309	10701.8	10736.8	9007.5	10246	10450.2	10452.8	9459	11669	10126.5	10465	9820	10243	10560
AP2S1	10993	10562.5	10837.8	11088.2	8919	11737.2	11675.8	11731	11700	11158	11755	11679	11704.5	11718.5	11692.8
AP3B1	9261.5	7505	7634	7750.75	5365.5	10131.5	10789.8	10799.8	9711	9262	10932	10736.8	10986	10442.5	10622.5
AP3B2	1445	568	1246.75	1101.5	1560	1409.25	1031.75	448.5	882	1704	619.5	2036.75	826	2961	690.25
AP3D1	11100	9495.5	9957.75	9709.25	6651.5	9422	9630	8787.75	8896	10829	8942.5	8738.25	9728.5	8434.5	9018
AP3M1	10201	8425	7774.5	8306.5	7182.5	8457.75	8492.25	9012	7991	10117	8143	8079.5	7275	7178	8602.5
AP3M2	10509	4749.75	8276	7320	8454	9392.5	9028.25	9306.25	9774	9785	8545	9804.5	9178.5	9942.5	9311.5
AP3S1	9110.5	11477	11581.5	11403.5	10861	8301	9095.5	8380	6902	8611.5	8596	8272.75	8654.5	7889.5	8542.25
AP4B1	7130	7462.25	6257.25	6873.75	8229.5	8567.5	7705.75	7789.75	8282	5838.5	7860	6823.75	8754.5	9070.5	7865.75
AP4E1	5797	6451.75	4881	6209.75	7591	5383.5	5815	5679.25	4981	5362	5430	4627.5	5967	5541.5	6431.25
AP4M1	6575	3383.75	2593	2572.5	2568.5	4530.5	4752.5	3941.75	3728	6524	3628.5	3592	3518.5	3927	3832
AP4S1	1344	5645	5016.25	4635	4104.5	3268	1604.5	1744.5	3636	1069	213.5	1651.25	2100.5	1565.5	1491
APAF1	8730.5	4586.25	3769.25	5142.5	6423.5	7503.5	6608	6302	7703	6775.5	7592	6203.75	5986.5	6604.5	6926
APBA2	6941	947.5	2025	1677.75	4477	1745.5	2409.25	708.5	1880	7754	4772	1227.75	3391.5	1546	2197.75
APBA3	3091	4318.75	5082.75	5736.25	3906.75	7973	7822.5	7651.25	7350.5	3177	6294	8151.25	8355	7959	7677.5
APBB1IP	334	6096.5	2068.75	8801.5	2717.5	7049.5	7613	5757.25	7490	405	4675	7046.75	6167	6882	5237.75
APBB2	5007	8090.5	7959.5	6909.5	6866.5	2021	1104.25	1168.5	1134	9475	692.5	1181.25	1079.5	800	990
APCDD1	3123	11439.8	11450.5	11163.5	11286.5	4754	3202.75	4060.5	3969	5923	3399	4054.75	3368	2328	3332.5
APCDD1L	3474	533.75	475.75	317.25	445	3557	3076.5	1888.25	1413	3704	580	2699.25	905	4624	735
APEH	9560	5568	4785.75	6743.75	7991	10351.5	10340.2	10642.5	10668	9900	10616	11008.2	10586.5	10492.5	10737
APEX1	10360	10906.5	10895	10843.5	10362	11048.5	11048.8	11020.5	10846	10162	11092.5	10982	10945.5	10570	11184.8
APEX2	6823	3018.5	3367.25	3881	4303.5	8599	8113.5	8493	8220	7436	7014.5	8833.5	8925	8764.5	8287.5
APH1A	10356	8351.5	9683.5	7479	8767.25	10435.2	10376.2	9895	10485	10405	11034	10492.2	10385.5	10203.5	10052.2
APH1B	8238	4335.25	7347	3479.25	6095	7664.5	7828.25	7067	6853	8771	6294	7461.5	9294.5	8965.5	7791.25
API5	11005	9963.25	9817	9842.5	11166	9140.25	8876.25	9217.5	8596	10897	8996.5	9648.5	8481	9406	9076.25
APIP	9552.5	7322.25	8135.5	8459	5100	8054.5	7343.25	7671.75	6239	10074.5	6540	7711.75	7040	5454.5	7042.5
APLF	2692	1260.25	3573	1635	2572	508	2406.75	2192	471	2372	1635.5	1698	2058.5	1228	1897.25
APLN	2582	953.25	2468.75	699.5	3841.75	2265.5	2638.5	2175	2423	2625	3073	3558.75	2100.5	2800.5	2312.75
APLNR	1313	3905.25	2962	1982	3930	5984.5	5891.5	6541	8260	1184	5471	5547	4050	4215.5	5531
APLP1	3198	248.5	398	197.5	1378	1865.5	3066	2494.25	1849	3143	962	2038.75	2774	1477	1685
APLP2	11649	11235.5	11243.5	11036.5	11725.5	8306	8824.5	8747	8635	11627	8377.5	8693	8371.5	9070.5	8190
APOA1BP	11102	8772.5	9666	9381.5	10101.5	10838	10874.8	11053.8	10875	11442	11082.5	11088	11088.5	10407	11200.8
APOA4	1376	809	567	1599.25	1350.5	282	539.5	613.25	2871	1480	40.5	252.5	1079.5	921	819.75
APOBEC3B	9181.5	2316.5	1882.5	4450.75	3150.5	4505.5	5355.5	4093	1794	8124	1367	1230.75	4050	3487	4410
APOBEC3C	9097	4221	5996.25	5763.5	5755.5	4782	6788	5188	4529	10111	4403.5	6161.25	6922.5	6160	5586.75
APOBEC3F	4033	2497.75	3238.75	3181.25	2992.5	6500	6240.75	4339.5	6030	3671	5267.5	6229.5	6560	7034.5	6173.25
APOBEC3G	4271	4140.75	4275.25	8367	8737.5	6230	6922.5	4620	3947	3054	5635	6759.5	5422	7221	5421.25
APOD	7157	11391.5	11568	11569.5	11738.5	11449	11626.2	11602	10315	8284	11596.5	11737	11740.5	11718	11732.5
APOE	8756	10537.8	11252.5	11557.5	10472	11674.5	11570.2	11614.8	11764	9283	11792.5	11790.5	11762.5	11728.5	11597.5
APOL1	1561	1884.5	1004.75	3477.5	3909.5	2981.5	4559.25	1415	4444	1570	962	3638	2847	2660	1529.25
APOL2	5372	3874.75	4842.25	6386.5	10947	4698	4885.5	5098.25	5767	4630	2957	4821.5	4587.5	5196.5	4613.5
APOL3	973	6240.5	5435.75	6357.25	4798	6330	6900.25	6585.75	7262	962	5387.5	8765	7590	6092.5	4844.5
APOL4	899	2448.75	1586.5	3986	2204.5	1281	2124.5	1386	2852	1023	2523	1737	1079.5	1361.5	1597.25
APOL6	2880	5282.5	5542.25	6790.25	7924	2235.5	1846.5	1494	2100	3029	2023.5	2358.75	1303.5	1188	1689
APOLD1	10309	6083	5702.5	4714	6199.5	5815	7457	5875.5	3453	8931	5286	6804.25	10193	4646.5	7745.75
APOM	1707	3872.25	3320	4110.5	3860.5	3457.5	2354.5	3373.75	10798	1745	4237.5	3240.5	2539	2468	3264.75
APOO	7474	5421	5665.5	6690.5	8994	7845	9486.5	9811.75	7362	5781	8298	9558	9607.5	8577	9140.5
APOOL	9256	8059.75	7105.5	6200.5	8290.75	3898.5	6137.75	4661.75	4177	8355	3570	4403.5	6481	4206	4580.75
APP	11774	8874	10775.2	7043.5	11155.5	10199.5	10285.5	9960.75	8869.5	11715	10855.5	9280	9926	10504	10274.2
APPBP2	9947.5	8524.5	9053.25	8560.25	8040.5	8706.5	8816.75	9219.5	8054	9698.5	10140.5	10140.2	9639.5	8892	9555.5
APPL1	9582	8379.75	6798	6823.5	6088	5828.5	7153.25	6923	6524	10066	6862.5	7448	5422	6218.5	7334
APPL2	7500	9284.5	8391	8847.25	6266.5	8212	8807.75	8678.75	8774	9095	8864	9497.5	9098.5	7420	8598
APRT	8141	9284.5	8809.75	9343.75	10379.5	9898	9831.5	9815	9600	7072	10307	9242.75	10332.5	9762	10401.2
APTX	5805	6766.75	6376	6583.5	6248	8448.5	8131.5	9302.75	9022	5881	8712.5	8772.5	8670	8127.5	9282
AQP1	2123	11244.2	11528	10332.2	11206.5	3570	2959.5	3275	3477	2490	3770.5	2419.75	3251	3147	2505.5
AQP11	1985	1240.75	1531.25	2308.5	1543	3995	2849	4380	5272	2474	3294.5	4129	4027.5	4892.5	3349
AQP6	2624	713.25	1774	865.25	1680	3259.5	639.25	411.75	3728	2530	505.5	625.25	625	158	703
AQP8	2171	807.5	950.25	210.25	411	547.5	629	659.5	494	2373	363	354.5	72.5	541	419.75
AQP9	46	5446.75	1729.25	4434.5	1517	3847.5	3812.75	4583.5	10690	81	2746.5	2604.25	4816.5	2285.5	3835.5
AQR	8220	8243.25	8178.25	8303	7824	7140.25	7648	7015.25	6914	8496	7626.5	6368.75	8061.5	7274.5	7404.75
ARAF	8557	6055.25	7683.75	6035	4192	9138.5	8607.25	8593.75	9472	9639	7264	8574.25	8670	8946.5	8428.5
ARAP1	5250	5587	7753.25	5718.25	5053.5	6141.5	6353.25	5932	6228	6233	6915	5841.5	6309.5	6260	6003.5
ARAP3	3201	4573.75	5256	4214	5725.5	9389	9648	7041.25	8704	7147	9882.5	9357.25	10180.5	9176	10381.5
ARCN1	11108	9553.75	9523.5	9725	9836.5	10416.5	10596.5	10638.8	10421	11187	10703.5	10724.2	10567.5	10482	10800.8
AREG	1679	3780.75	2419.75	6007.75	2585.5	383.25	293.75	202.75	354	1770	397.5	198.25	406	83	199.25
ARF1	11777	4622.75	4806.25	4563.25	3545	11456.5	11443.8	11449.2	11299	11783	11466.5	11415.5	11463	11308	11375
ARF3	11086	10708	10858.2	10565.5	9897.5	9267.5	9148.75	8698.5	9231	11288	10616	9126	8685	8877	9178.5
ARF4	11710	11501.5	11486.5	11461.5	11112	11426.5	11450.8	11464.2	11113	11690	11401	11517.2	11365	11481	11478.2
ARF5	7582	9274.25	9678.25	9514	9117	9842.5	9851.75	9963	10248.5	7835	10018	10149.8	9607.5	10276	9964.75
ARFGAP1	7908	4524.5	7550	5142.5	4468	8995	9147	9010	9002	7768	9951.5	7959.5	10682.5	9120.5	8874.5
ARFGAP2	8331	8757.25	9096.75	8404.25	7326.5	8009	7787.25	7271	7709	8622	6294	7532	6187	6788	6378
ARFGAP3	9128	9473.75	7660	9109.5	7855	9086.5	8879.5	9175	8019	8212	8319	8077.5	9653.5	9533.5	8638.75
ARFGEF1	8031	9566.25	8773.25	9628.25	10874	7633	7883.75	7607	7434	8020	9675	7562.5	7894.5	7850.5	8052.5
ARFGEF2	10593	10367.5	10042.5	10359	9705	4692.5	5497	4439.75	3961	10407	4151	4696.5	7356	4302	4787.75
ARFIP1	8301	9362.5	9296.75	9183.75	8292	7972	8142.75	7776.75	7454	9523.5	8244	8719.75	8162	8758.5	8309.25
ARFRP1	7148	3279.5	2423	4540.25	3749	3944	2970.25	2295.5	3992	6179	2707.5	2966.25	3489.5	3669.5	2393
ARG2	3645	1838.25	2112.25	2279	9055.5	3689.75	4130.5	3903	3372	3272	2455	2988.75	4104	3945	3989.75
ARGLU1	9749	11470	11360.5	11485	11395	10571.2	10338.8	10429.2	10488	8920	10669	10711	10850.5	10222.5	10362
ARHGAP1	8943	11107	10880.5	10877.5	10727.5	10358.5	10006.5	10153.5	10063	10929	9613.5	10631.5	9546.5	10135	9545
ARHGAP10	4819	5681.25	5518.75	5251.25	4142	5503.25	5646	5511	7230	5648	4566	5064	5822.5	6401.5	3417.25
ARHGAP11A	10687	637.25	1168.25	961	1601	3851.5	3138.75	2687.25	3531	9274.5	1543.5	2833.25	2508	2839	3146
ARHGAP12	9752	8406.75	8453.75	8111	5360.5	5586	5873	6657	4121	9683.5	6247	6238.75	5399	7013.5	6192.25
ARHGAP17	5603	8538.25	7950.25	7389.75	7860.5	10303	9846	9675.5	9974	7619	10153	10088.5	9697	9792	9593.75
ARHGAP18	8650	8920.5	7078	8961.5	9239.5	3797.5	5431	4948	2762	6722	2902.5	5334	4498	5342	4819.75
ARHGAP19	8012	5479	3856	4660.25	6465	6619	6160	6913	6156	6480	6399	7142.25	5375.5	6945.5	6628
ARHGAP20	2515	3553	3953.75	1269.25	2344.5	2077	884.25	2986.5	1447	1615	3486	4147.25	475.5	755	1864.25
ARHGAP21	10663	9485.5	8103.25	7903	7680.5	9894.5	9469.5	10104.8	10118	10847	9418	10017	9767.5	10683.5	9754.25
ARHGAP22	1735	1147.75	1798	727.5	5406.5	5046.5	3156.75	3317	3993	1839	6672.5	4175	2875	6788	4883.25
ARHGAP24	2978	4352.5	5465.25	2996.5	5037.5	5279	5098	6349	5379	3577	1320.5	5159	6073	8202.5	5323.5
ARHGAP25	1085	3636.75	2671.5	7038.25	6816	5669	5832	5708	4870	1275	5534.5	6885.75	4883	6845	5917.5
ARHGAP26	4258	4219.75	3729.5	3375.5	4980	2438	3940.5	2398	3502	4851	1219	2893.5	2737.5	3013.5	2966
ARHGAP27	2650	5464.25	3966.5	4237.5	5241	2597.25	2088.25	2575.75	1882	2752	1924.5	1752	2268.5	3678	2201.75
ARHGAP28	3211	3337.75	2862.5	4200.5	3601.75	2617	2653.75	683	1520	2373	4610	3336	3577	1769.5	2620.25
ARHGAP30	2363	5781.25	4047	8026.5	5733	7792	7208.5	6455	7440	2353	4816.5	7116.5	6095	6666.5	4622.25
ARHGAP32	6413	6520	6143	5677	8490	6051.5	5768.5	6797	6795	8200	6436	5789	6900.5	4297	5076.5
ARHGAP33	3129	2376.5	4102.25	4133.5	3146.5	7289.5	5738.5	5437.75	6227	2978	4281	6024	7171	5082	6157.5
ARHGAP4	3232	995	2332.5	2576.25	2362	8651.75	7258	6494.25	7275	3330	7742.5	6526.75	5270	7590	6967.25
ARHGAP42	7100	1818	3297.25	2115	2725.5	1630.5	2091.25	2812.75	1549	7027	3112.5	2590	2995.5	2032.5	2444.75
ARHGAP5	10378.5	8956.75	8921.25	8275.5	9021	2175	2745.75	2491.75	2057	9448	1772.5	2324	2147	2055	2610.5
ARHGAP6	1273	5685.75	3455.25	2328.75	3913	682.25	610.75	1515.75	737	1145	1407.5	1043.25	2058.5	1616	1479.5
ARHGAP9	1505	3997.5	2367.75	7483	4851.5	7901.5	6588.5	5408.25	7011	1722	4430	6743.5	5089	6901.5	4054
ARHGDIA	5464	8596.5	10182	9757	9068.5	10580.8	11417.5	11080.5	10636	6874	10624	11132	11527.5	11381	10528.5
ARHGDIB	1911	10788.2	9656.25	11466	10703.5	11540.5	11498.5	11240	11443	1307	11576.5	11511.2	11463	11392.5	10770.2
ARHGDIG	3292	1305.75	2247.75	1385	352	417.5	621	364.75	819	3468	471	303.25	121.5	585	424
ARHGEF1	7659	3039.25	4231.25	1945.5	2103	6235.25	6168.25	6065.75	4902	8066	6629	6410.25	6652.5	5466	5839.75
ARHGEF10	5826	9192.25	7992	6060.5	7220.5	8616	6618.5	7891.25	7804	5688	8748.5	8497.5	6701	8066.5	7900
ARHGEF10L	3963	7335.75	7022	7246.25	6304	2474.25	2876.5	3429	3855	4918	3454	3858.75	2737.5	2913	2666.75
ARHGEF11	7635	3642	4439	3416.25	6185	6195	5529.75	5992.5	5727	8738.5	7666	6531	6922.5	5811.5	5571
ARHGEF12	10047	11420.5	11320	11157.5	11015	4587	4111.75	4999	5534	10828	4861	5690	3368	4732.5	4331.5
ARHGEF15	3854	3174.5	3386.25	2918.5	3416.25	2493	2319	1057.75	3354	3912	913.5	1206.75	268.5	707	256
ARHGEF16	3170	1757	4114.25	1990.25	1497.5	1766	3350	2091.75	4066	3269	5828	2357.75	4225	929.5	6529.25
ARHGEF17	4164	2695.75	4556	3178.75	5108.5	5042.5	3780	4725.75	4481	5715	4861	5343.25	3082.5	5418	4629
ARHGEF18	6150	6358.75	6590.25	7756.5	9788	10717	9827.5	10144	10358	6855	9518.5	10405.2	10332.5	9731	9562.25
ARHGEF19	3113	3386.5	3230.25	4126.75	4179.25	5249.5	4848.5	4137.5	5204	3293	4321	3566.5	5422	5794.5	4863
ARHGEF2	8037	6946.5	8195.25	8451.25	10512	11010.5	11224.2	11466.5	10761	7856	11461	11476.8	11519.5	11462	11283
ARHGEF3	5427	8449.75	6241	8713.5	8815	8825.5	9348.75	8473	8447	7093	7646	9546.5	7377.5	10094.5	8653.75
ARHGEF37	1595	9551.25	9310.25	7816.25	8520	2939	2659.75	1774.25	2666	1939	1971.5	3808.75	4638	2120.5	3548.75
ARHGEF4	2406	7257.25	6214	5465	8522.5	932.25	212.25	971.25	2176	2473	363	125.25	268.5	1405	466.75
ARHGEF5	4259	7738.75	7629	6554	5675.5	3242.5	3360.75	2491.5	2979	3565	162	2119.25	4104	1749.5	3777.25
ARHGEF6	2850	8372.75	7603.5	8509.25	7741.5	8671	9564.25	7605.5	8204	3785	5851.5	8833	6328.5	9897.5	8081.5
ARHGEF7	7972	10687	10461.8	9670	10633	9889.75	9551.5	9500.5	10035	8349	10703.5	9426	9916	8942.5	9800
ARID1A	6111	9699.75	9056	9847.75	7232.5	10141	9800.5	9728.25	9707	8629	9882.5	9934	9147.5	8957	9550.25
ARID1B	5925	9722.5	10508.5	8051	8920	6678	7355.25	6496.75	6895	8377	7742.5	6760.5	7894.5	5811.5	6662.25
ARID3A	4571.5	2745.5	2427	1975	2182	7374.5	6802.25	6689	6182	5149	8046.5	6573	7465	6070.5	5675.75
ARID3B	1651	1291.25	760.5	620.25	2454.5	5858	4445	5007	4560	1125	5661	3643	4683	4178	5326.75
ARID4A	4349	5681.5	6448	5635	4685.5	4194	5230.25	4559	3518	3312	3910	5428	3754	5179.5	5082.5
ARID4B	5417	9877.5	10026.2	10333.8	10401	6266.75	6189	5960.25	7881	4524	6672.5	6841.25	6008	6180	5526.5
ARID5A	4242	2370.5	2269.25	3262.25	3788	3309.5	3088.25	2633.25	1391	4817	1635.5	2580.5	3577	3787	1801.75
ARIH1	9943	10252.2	9691	9517.25	9844.5	6733.5	6066.75	5917	5540	10201.5	5224.5	5994.75	7377.5	6276	6518.75
ARIH2	9610.5	5551.25	5838.75	6388.5	7749	9950	9255.75	9392	9542	10502	10189.5	9599.5	8685	8702	9952
ARL1	9924	8845.5	8025	9662.5	9396	9125	9704	9076	9527	9244	9547.5	9499.75	9878	9120.5	9500.25
ARL10	2883	6967.75	6895	6522.25	8566.5	1082	757.5	628.5	823	4284	1826	587.75	826	1345.5	884
ARL13B	9568	6195	4776.5	5964.25	3012.5	2716.25	3759.75	4292	1792	9069	1971.5	3469.25	3577	3741	4221
ARL15	3533	9409	9317.25	8235	7295.5	3130.5	3914.25	3494.25	2825	4118	3151	3393	3279.5	3414.5	3322.5
ARL2BP	10128	8232.5	7884.75	8059.75	4352.5	10415	10684	10276.8	9959	9960	10443.5	9977.5	10483.5	10264.5	10374.5
ARL3	2496	7911.75	8216	8068.5	7099.5	2940.5	4083.25	4418.5	2896	2644	3017	3321.5	2847	3147	3219.75
ARL4A	5968	10603	8498	9746.75	8233.5	5001.5	5317	6031	3962.5	5060	6139.5	5252.25	5565	5317	4975.5
ARL4C	7978	9129	5673	10303	9936	3226.5	3490.5	3399.75	3389	9750	2138.5	3877.75	3342	5908.5	3041
ARL4D	2889	6324.25	5582	6142.75	3080.5	2085	2196.5	3240.5	2479	2546	1448.5	1970.25	868.5	2245.5	2634.75
ARL5B	9097	8836.25	9574.5	9568	9117.5	4340.5	4101.25	4478.5	3508	9319	5002	4276.25	3518.5	5318.5	4758
ARL6IP1	11828	10903	11250	11283	11064	11336.5	11270.5	11214.2	10986	11805	11169	11408.8	11004	11268.5	11453.8
ARL6IP4	9860	8220.25	8551.5	8447.75	8444	8199.5	9348	9514.75	8933	10561	9675	9212	10214.5	9831	9564.75
ARL6IP5	11611	11568.5	11548.5	11569	11416	11348	11539.2	11452	10418	11660	11238	11555	11569	11514.5	11257.2
ARL6IP6	8479	10283.2	10089	10171.8	7252	7701	6879.25	7192.75	4421	7675	7395.5	7418.25	6031.5	7623	7539
ARL8B	9426	11327.2	11144.5	11331.5	11031	9810.5	9445.25	10032	9547	10530	10140.5	10632.5	8907	10136.5	9517
ARL9	913	1305.75	662.75	1450.75	2470.5	2200.5	1193.25	1688.25	1705	1023	1270	1088	2812	5174.5	1029.75
ARMC1	10059	8489.75	10326.5	9737.25	8564.5	8532	9020.75	8985.25	9152	9106	10463.5	8905.75	9228	9698	9282.25
ARMC10	8985	8429	8077.75	9413.75	8004	9617	9795.75	9917.25	8467	7595	9098.5	9979.5	9916	9070	10080.8
ARMC2	1349	1248.75	963	990	318.5	1363	2070	2004.25	2005	1410	1879.5	1609.25	2011.5	1228	2030.5
ARMC4	174	2079	3850.25	2169.25	367.5	249.75	233.75	400.25	628	203	1971.5	377.5	554	273	340
ARMC5	3238	2542.75	4730.75	3430.75	2555	3507.5	4670	3480.75	4982	3340	3747.5	3662	5822.5	3827	3427.75
ARMC6	7461	2367.25	3222.5	1741.25	3323.5	5840.25	6237.5	5907.25	6627	7004	5661	5482.75	6167	5744.5	5742.75
ARMC7	4326	3894	2327.25	4193.25	3278	6364.5	6423.5	6062	5940	4656.5	6936	6114.75	7233	6433	6153.25
ARMC8	9827	7267.5	7898.75	7065	5958.5	4534	4037.25	4688.5	2282	9255	4430	4884.75	2468	4215.5	4924.75
ARMC9	9895	2779.5	3115.25	2783.25	4778.5	2896.5	4030.25	4092.25	4223	11062	4748	3620	4541	4229.5	2950.5
ARMCX1	7487	9898	10901.2	9408.5	9939.5	7950	7578	8026.75	5222	7490	819	8660.5	7399.5	8200.5	7035.25
ARMCX2	2882	6481.5	4878.5	5070.75	4366.5	8542.5	5501	5633.5	7129	2878	9134	7290.5	2875	6576.5	6810.5
ARMCX3	9301	7486	8650	8440.5	9309	6792	6862	7460.75	5048	8497	8064.5	8682	7210	7463.5	7087
ARMCX4	3024	5171.25	3033.5	3229	5307.5	2360.75	1726.5	2438.5	3188	1482	3112.5	2566.75	2468	3292.5	1963.25
ARMCX5	4734	5560.75	6344.25	4815	6763	5172	5399.25	6115.25	3710	3902	5661	6269.75	5760.5	6325.5	5881
ARMCX6	9887.5	10462.5	10779.5	10054.2	11403.5	8088.5	7965.5	7477.5	7579	7060	7541	8685.5	6766.5	7828	7929.75
ARNT	7998	7473.75	7417	6804.75	9563	4301	5645.25	4859	5069	9419	6139.5	5482	5223	4803.5	4721.5
ARNT2	6330	2452.5	6544	5152	4016	8448	9579.25	8907	6681	5890	10660	8784.25	9965.5	5466	10128.5
ARNTL	4515	7218.5	6111	6627.75	5477	4603.75	4032.75	4058.75	4437	5014.5	1635.5	3135.25	2774	3401	3318.5
ARPC1A	10643	10374.5	10320	10765.8	10479	11165	11321.2	11381.5	10921	7463	11601	11299	11326	11211	11473.8
ARPC1B	11655	9442.75	10173.5	11073	9058.5	10589.8	10677.5	10931.5	9794	11408	10796.5	9843	10012	10472	10608.8
ARPC2	11768	11688.5	11581	11716	11723	11614	11614.2	11577.8	11583	11684	11519.5	11544.2	11547	11492	11529
ARPC5	11135	11181	11132.8	11441.5	10627	11258	11255	11407.2	11173	10956	11360.5	11448.5	11234	11381	11412
ARPC5L	6104	10048.2	9448.75	10264.2	10813.5	8992.5	8844.25	9480	9264	4303	8082.5	8366	9117	8872	9309.25
ARPP19	11309	11005	11308	10878.5	11288	9178.5	10794.5	9996	9246	11590.5	10089.5	10293.8	10672.5	10396	10836
ARRB1	8904.5	6251.5	6066.25	6579	5903.5	8099.5	8591	6942.75	8139.5	9997	9321.5	7148.5	8096	3401	8699.75
ARRB2	4957	2880.5	2238.25	4194	3370	3946	3381.5	2858.5	2893	6399	3183.5	3017.5	2344	3202.5	2287
ARRDC1	5070	4779.75	3049.75	3337.75	3205	2631	2532.5	1766.5	2236	5051	1077	1725.75	2268.5	1667	719.25
ARRDC2	4191	4482.25	4347	5198.25	3955.5	5726.5	5271.5	5099	5857	5505	5513.5	5384.5	4723	4952	5454.75
ARRDC3	8571	10658.8	11032	10245.5	8196.75	4947	4507.75	4348.25	3481	8733	5246	5620.5	3955.5	3636	5799.25
ARRDC4	4714	11094.5	10528.8	9897	8080.5	3939.5	3186.25	3455.25	2535	4737	4816.5	3942	4611	5245.5	3016.25
ARSA	4869	1266.25	1293.75	1671.25	2723	5985	6158.5	7112.75	5940	6762	5513.5	6431	5822.5	7629	6468.5
ARSB	8001	1545.75	1411	1867.75	3975.5	7556.5	7564.5	7327.25	6346	9412	8748.5	6873.25	7189.5	6688	7250.25
ARSD	6099	5044.75	5669.25	2994	8124	7743	8619	6101	9457	6564	6318	7452	9194.5	8965.5	8505
ARSE	3534	837.5	2198	880.75	2422.5	2158.5	1943	1303.25	5562	3157	4793.5	1139.75	3279.5	2625.5	2032.5
ARSG	4939	3528.5	2340	2164.25	3769.5	4214	4841.25	4015.25	4890	6141	4049.5	5005	4027.5	3147	4308.5
ARSJ	4926	988	730.5	859.75	1657.5	1984	1289.5	2638.75	1243	4127	1586.5	2772.25	998	2839	1399.5
ARSK	5899	2075.75	4581.25	3869.5	1582	2944	3510	3322.5	1792	5729	3017	4194.75	2229.5	3759	3357
ART3	1789	1170.75	2284.75	1053.75	956	2016	2203	2805.75	2280	663	3724	4228.25	2100.5	3656	4690.5
ARTN	3082	1151.25	1760	1550.25	1356	1055	967	1000	611	3258	363	1272.75	247	1392	1170.75
ARV1	9145	8017	7174.5	8541	8365	8681.5	9580	9692.5	8561	8041	9388.5	9781	9653.5	8721	9119.75
ARX	5336	1045	3286	1947.5	1414	1550.25	2181.25	1664.25	920	5255	1497	2167	1079.5	825	1166.75
ASAH1	11763	11595.5	11674.8	11598	10986	6578.5	6471.5	6589.5	6146	11776	6378.5	7445.5	5131	5250	5548
ASAP1	9497	10193	10776	9988.25	10832	10161	11201.2	10996.2	11086	10331	11436.5	10974.5	11532.5	11099.5	10918.5
ASAP2	9385.5	9906	9628.25	8415.25	8224.5	8038.5	7706.25	8552.75	7696	9863.5	9787	8356.25	8162	9527.5	8897.5
ASAP3	2921	8786.25	5188.75	5484.5	5486	6640.5	6594.25	7092.5	7103	3641	7646	6173.75	7445	8373	5035
ASB1	6885	4649	4482.75	4788.25	6955.5	7515	7309.75	7761.5	8110	6285	9031.5	5923	7783	4803.5	7421.5
ASB10	1093	627.5	772.5	420	1930.5	2460	1252.25	1081.75	3518	1247	5983.5	1306.25	554	1054	455
ASB13	5747	7419.75	7166.75	6617.5	6127	6297	4332.25	5829	7651	6770	4901	4898.5	3368	4689	4728.25
ASB16	4343.5	3037.5	1732.5	2031.75	1078	2505.75	2036.75	2998.25	759	4293	397.5	2194.25	2100.5	2265	2008
ASB2	2330	944	943.25	970.75	2042.5	2265	2339	1825	1595	2676	3600.5	1894	1558	2499.5	1578
ASB4	685	812.25	2284	1346	784.5	1025	699.5	935	1506	664	819	1129.5	377.5	1228.5	2053.25
ASB6	4844	3581.75	4086.75	3291.25	3470.5	5589.5	6897.5	5199.75	4632	5338	4455	4187	7706	5043	5552.75
ASB7	2888	5476.5	4345.5	4945.25	7594	3798.5	3484.5	3202.25	2774	3194	3323	3282	3983	3170.5	3672.25
ASB8	7606	6541.25	7784.25	5910.25	7182.5	6866	7355.25	7351	6999	7416	9065.5	7891	6206	7013.5	8514
ASB9	6129	2135.25	4982.75	3463.5	5424.5	8588.25	8261	8257.75	8752	4928	7053.5	8959.25	8670	8328.5	9243.75
ASCC1	7774	5764.75	4637.75	6296.5	6412	8625.75	7357.25	9045.5	9050	8893	8614	8552.25	7336	8789	8428.5
ASCC2	9008	4925.5	2279	4089	6404	10773	10313	10426.2	10556.5	7623	10763.5	9651.75	10344.5	10396	10538.5
ASCC3	10073	6737.75	5982.25	6909.5	5607.5	7024.5	7312	6943	6293	9347	6695.5	7161.5	6879	6489.5	6419.25
ASCL1	961	861	1886.75	1012.25	1730.5	1655	1553	905.75	1076	1012	2564.5	1528	4007.5	1131	1850.5
ASCL2	2510	2725.25	1980.25	1442.25	2696.25	5299.5	4790	3828.75	5567	2620	2369	5621.25	4683	5633.5	3214
ASF1A	7947	8945.25	7994.75	8026.5	7552.5	5572.25	6079.5	5477.25	2324	6155	5046.5	4902.5	5653	6001	6328.75
ASF1B	9773	991.25	2031.75	2912	3789.5	6105.75	7880	7898.75	4793	9317	6540	7098.75	7969	8434.5	8450
ASGR1	3690	327.75	109.75	1062	1827	4610.5	5279.5	5206.25	11493	3800	5828	5374	4407.5	7034.5	3992
ASGR2	1914	2591.25	698	691	2326.5	1894	1734.5	1832	11136	1858	1826	2007	1846.5	2165	1387.25
ASH2L	11430	8637.5	9566.5	9067.75	10743.5	9881.75	9925.5	9932.75	9542	11047	8927	10389	8222	9272	9907.25
ASIP	2297	1381.75	1246.5	641.75	1033.5	2239	3085.75	2676.75	2136	1752	3600.5	3631.25	6790	4713.5	1566.25
ASL	7119	4547.5	2904.75	4991.5	4900.5	5619.5	4704.5	4166.25	6706	5712	3570	3653.75	5109.5	4279	4483.25
ASNS	8455	6937.5	6098	6919.25	8070.5	9208	9654	9873.75	7154	8215	3017	6483	10103.5	9642	9901.75
ASNSD1	9288	9344	9673.25	9611.25	9577.5	9413.25	9655.25	10075.8	9588	8260	10537	9759	9767.5	9879.5	9427
ASPA	689	6161.75	7130.5	3421.75	5025	2531	3476	1526.5	4315	4656	6116	5722.5	7670	4809	1738
ASPH	10559	9762.75	8560.75	9066.5	11204	5257	3118.75	3302.5	4498	10495	4403.5	3713	3023	3787	3277.75
ASPHD1	3158	2645	4137.5	2918.75	1638.5	3076.25	2951.75	2394.5	1876	3226	2083	1929	5176.5	4646.5	2789.75
ASPHD2	2454	4051.25	2323.5	3606.25	3946	4191	3895.25	3951.5	2198	2679	729	3963.5	4027.5	3734	4135.25
ASPM	8937.5	4105.5	3441	5816.25	4952	7505	8749	9063.5	7029	5508	9547.5	7501	9245	7688.5	8864
ASPRV1	1690	11505.5	10502.2	11682	7303.25	2068.5	2328	1134.25	2140	1624	397.5	1606	826	1138.5	1675.75
ASPSCR1	6199	2285	3371.25	4085.25	3237.75	10740.5	10550.8	10605.8	11046	6788	10443.5	10602	11094.5	10590.5	10804.8
ASRGL1	8562.5	4507	4168.75	4225.5	2178.5	2348.5	2915.5	3909.25	2002	3794	1077	2606.5	2058.5	1354.5	2896.5
ASTE1	4046	3996.75	2454.25	3493.75	4483	5565.5	5414.5	6024	6434	4019	5513.5	6287	6328.5	5397	6609.25
ASTN2	1898	917	2267.25	1226.5	4494.5	4330	4153.25	5239.25	5316	2123	4355.5	4528.75	5065	5227.5	3592.5
ASXL1	8273	7308	8499.5	7094.25	9059	8134.25	8026.25	8100	7775	8816	9660.5	7532	8568	7509.5	7907.75
ASXL2	7775	10784.5	10308.5	10406.2	7931	8902.5	8705.75	8229.25	9144	8332	8661.5	8374.5	9312	7605	8548.25
ATAD1	11251	9563.75	9993	10156	7596	7315.25	7506.75	7221	6863	11516	7501	7410.25	6922.5	6316	7818.75
ATAD2	8882	3413	1875.5	4090.75	4313	5525	6220.75	5634	3706	9048	6844	5105	5270	6133.5	7002.5
ATAD3A	7649	4355.25	5696.25	4174.25	4661.5	7829.5	8419.5	8040.25	7827	8618	8438.5	7048	9623	8349	7980
ATAD3C	1751	521	1427	879.75	2186.5	1771	2414.25	1620.75	1632	2205	2183	1430.75	2468	1188	1607.5
ATAD5	7163	1895.5	2649.25	3025.5	2590	2614	1891.5	2715.5	2522	3414	3351	2065.75	1126.5	1361.5	1907
ATE1	9661	7348.25	6758.25	6567.25	6317.5	3218	3267.5	3569	2277	9260	3424	3012.25	3312	3339.5	4117
ATF1	5548	9319	8198	8936.25	7576	3693.5	3439.75	4061.25	2751	4239	3323	3849.5	2928.5	3127.5	4536.75
ATF2	11040	8671	8032.5	8775.75	8795	4734	4115	4659.25	2744	11009	4455	4156	4428.5	4713.5	4082
ATF3	1756	9579.75	3825	10802	3961	5977	5659	5893.25	4736	2367	4723	6741.75	5803	10660.5	5654.5
ATF4	7136	11524.5	11637.5	11471.5	11596.5	11646.5	11617	11709.2	11691	5637	11657.5	11543	11690	11704	11729
ATF5	4491	4073.5	5723	3905.25	5103.25	8838.5	7731	8151.25	11000	4547	8696.5	8368.75	9052	9923	8016
ATF6	11074	9812.75	9188.75	9149	6357.5	9327	9363.25	9300	9442	11028	9183.5	9441	9052	9005	8758
ATF7IP	9197	10096	10972.5	10042.2	10512	1793.5	2152	1270.5	3009	9997	1543.5	2131	1931	2098.5	1605
ATF7IP2	3003	3240.5	3766.5	4265.75	4655	3910	4032	2750.5	5829	1586	5828	2505.75	5198.5	5342	3054.5
ATG10	6054	3349	3119	2517.75	3459	7820.5	7715.5	7536	9713	5763	7626.5	8332	7670	7737.5	8733.25
ATG12	7519	8619.25	10096	9497	8870	9421.5	9482.25	9487.75	10635	6379	9991.5	9633	10054.5	9897.5	9632.25
ATG16L1	7563	3875	953	2695.25	7423	8449	8668.25	8551	8387	6568	8864	8155.75	8616.5	8907.5	8500.25
ATG2B	8382	10180.5	10239.8	8744.5	8369.75	4439	2865	2271	4154	9615	3514.5	2958	2229.5	2595.5	3352.5
ATG3	11149	10705	10730.2	11135.8	8714	9824.75	10352	10280.8	9173	10943	8996.5	10165.2	9767.5	9759	10214.8
ATG4A	5968	5559.75	4751	5722.25	5835	5460.25	5973.5	5954.75	6940	6194	4430	6741	6398	6901.5	6447.75
ATG4C	6106	2347.25	3930.75	4760.75	4791.25	6082.5	7419.5	7046.75	3971	6094.5	6185	6781	7275	6260	7477.5
ATG4D	7846	3307.25	4534.5	3611.5	8621	4133.5	4609	4183	4114.5	7939	3248.5	4405.5	4950.5	4451	4014
ATG5	9133	8131.5	7661.5	8932.5	6550	5407.5	6659.5	6480.25	5882	8375	6047.5	5911.5	6351	6444.5	5532.5
ATG7	6090	5148.25	5143.25	4574.5	5459.5	8905	8053.25	8363.25	8201	7505	8183.5	8241	7706	8571	7423
ATG9A	8267	5483.75	6573.25	4996.75	5876.5	7870.5	8198.25	7792.75	8297.5	9109	8204.5	7543	8836	7623	8068.5
ATG9B	3575	3498.75	1962.5	3290.5	4119	1000	274	628.5	779	3687	314	479.5	1174	191.5	904.25
ATHL1	2897	3200	3960	4758.75	4339	5237	5166.25	3671.25	5310	3282	1879.5	5230.75	5293	6570.5	6021.75
ATIC	10656	9017	8853.75	10093.2	10962	11061	10944.8	11293.8	11118	10494	11491	11136.2	11187.5	11122	11353.5
ATL1	2117	7462.25	6317.25	5736.75	4749	4736.75	3869.5	5781.25	5324	3522	5306	6237.25	2847	5442.5	6385.25
ATL2	10929	10868.2	10216	10612.8	8671	6062	4910	5205.25	5355	10163	5089	5042.25	5631.5	5412	6208.75
ATL3	11255	11167.8	10970	10955.2	11288.5	9285.5	8185.25	8583	8562	11470	6047.5	7885.25	7950	8739.5	7657.75
ATM	10875	7407.75	7883	9351.25	7187.5	9159.5	9266	9668.5	7748	10198	9223	9550.25	9457.5	8663.5	9460
ATMIN	7660	9306.5	8869.25	8866.25	9020.5	4862.5	6325	4774.5	5191	8510	5557	4504.75	5333	4781	5519.25
ATN1	6893	2176	4067.25	3172	6454	6810.25	7931.25	6937.25	5457	8821	8419	7516.25	8961.5	7141	7263
ATOH7	2277	230	851.75	248.5	293.5	642.75	2747	3296.5	1359	2069	3933	3084.25	2307.5	2207	3569.25
ATOH8	4540	1958	3729.5	3159.25	2394	3929.5	2631	5099	4624	4982	2957	3646.75	3312	2566.5	4787.75
ATOX1	11344	8445.75	7819	10004.8	11343.5	11241	11254	11241.8	11385	10403	11274	11035.8	11298.5	11217.5	11263
ATP10B	5504	5883.25	5008.25	5610.25	4875	4768.5	2629	8612.25	3530	1997	7646	4852	5223	8180	7136.5
ATP10D	5206	9967.5	8381.25	9387.75	7953	2262	1395.25	757.5	1481	6996	1826	783	1126.5	787.5	705.75
ATP11B	7043	9605.75	8963.75	9155.5	8630.5	6342.25	7087.5	6888.5	6703	7386	6185	7253.75	5760.5	5365.5	7086.5
ATP11C	7794	6664.5	5987.75	6741.5	6966	5637.5	5456	4998.5	6309	6749	4793.5	6135.5	5471.5	5388	5390.5
ATP13A1	7761	6696.5	7004.75	7117.5	6091.5	8478.5	8056.25	7683.25	6912	9046	6844	6682	7932	8066.5	7614
ATP13A2	8245	2121.25	2344.75	2070.5	4544	6652.5	6802	6051	5822	8812	5686	5972	7254	6234	5778.75
ATP13A4	254	3333	1393.75	2666.25	2837	509	1259.25	825.25	1755	268	1077	706	1478.5	1477	1368.5
ATP13A5	439	3337.75	1659	1084.5	437.5	254	191.5	126.5	691	325	35.5	155	22	351	69.5
ATP1A1	11819	11236	11381	11130	11304	11697	11759.5	11725.8	11682	11827	11747	11748	11772.5	11743	11686.5
ATP1A2	1929	5398	4405	2301.5	1642.5	553.5	753	299	210	2029	5661	180	19	121	441
ATP1B1	4399	11059	10892.5	10639.2	11455.5	9657	8792	9967	9743	8891	9203	9108	6900.5	8807.5	8881.5
ATP1B2	1958	893.25	2825	2183.5	1426.5	4848.5	2647	3150.25	5469	2127	5002	1790	2812	3953.5	3301.75
ATP1B3	10487	11728.5	11687	11691.5	11650.5	11292	11021	11436.5	11141	10295	11409.5	11473.5	11044	11295.5	11404
ATP2A2	11428	10247.2	10418.5	10902.2	11458.5	10271	10352	10526.5	9613	11647	10971.5	10482.2	10235	9031	10116.5
ATP2A3	3732	4491.25	1391.75	4302.5	3968.25	3296.75	2917.25	2440.75	2761	3646	2642.5	2685	1257.5	1818	2778.25
ATP2B1	10212	9785.75	8472.5	8887.5	9528.5	4699	4898.75	5011.75	5098	8592	5117	5397.25	4007.5	4587	5462
ATP2B4	11187	10585	10743.8	9620.5	6885.5	9050.75	9792.5	8918	8855	11333.5	10042	9411	9653.5	9138.5	8202.25
ATP2C1	10353	8165.5	8096.75	8416.75	8554	6822.5	6692.25	6985.5	5266	10400	8513.5	7682.5	8598.5	6745	6840
ATP2C2	1231	4246	3391.25	3063.5	4100.5	650.5	840.5	1163.75	462	1401	5983.5	869.75	1931	398.5	1488.25
ATP4B	3023	177.5	1883	718.5	1940.5	922	1026.75	792.5	770	2810	692.5	660.75	1217	1054.5	505.25
ATP5A1	11745	11746	11739	11752	11757	11690.5	11530.8	11647	11656	11700	11662	11604.8	11506.5	11621	11665.8
ATP5B	11777	11549	11472	11548	11639.5	11778.5	11733.8	11762.8	11758	11786	11816.5	11743	11702.5	11740.5	11753.5
ATP5C1	11691	11620.5	11695.5	11647.5	11711.5	11402.5	11422.2	11449.5	11454	11614	11338.5	11361.8	11503	11411.5	11339.2
ATP5D	9215.5	9142.5	9745.75	9357.5	9674.5	10990.5	11147.2	11280	11123	10351	10789.5	11199	11379.5	11194	11031
ATP5F1	814	11642.5	11588.5	11680.5	11389	11264.5	11408.5	11485.2	11275	913	11535	11315.5	11425	11123.5	11476
ATP5G1	6407	7827	8831	8373	11097.5	11134	10916.5	11077.5	11118	5576	11426	10983	10805.5	11262	11120.8
ATP5G2	8661	11501.8	11676	11553.5	10937	11529	11549.5	11664.5	11424	8996	11760	11610.8	11587	11528.5	11676.2
ATP5G3	11015	11424.2	11321.5	11540	11761	4964	4287.75	4401.25	4290	10896	5729.5	4544.75	3955.5	4646.5	3977.75
ATP5H	3913	11652	11628	11693	11155	11529	11552.2	11654.2	11585	3797	11679	11641.2	11661.5	11682.5	11641
ATP5I	9980	11310.5	11369	11489.5	11521.5	11696	11658.5	11686	11734	10237	11721	11665	11755	11692	11656.8
ATP5J	6460	11260	11339	11478.5	11298	11432	11563.2	11637.5	11498	5652	11635.5	11594.8	11632.5	11433.5	11591.2
ATP5L	8891	11616	11670.5	11692.5	11633	11531.5	11515.8	11666.5	11430	8803	11662	11535.8	11517.5	11477.5	11623.8
ATP5O	11637	11530	11590	11596	11542	11444	11393	11555.5	11465	11526	11667	11488.5	11519.5	11204.5	11468
ATP5S	4422	8968.75	7349.25	8095.75	6880.75	6662.5	6506.5	7588	6420	4008	5983.5	7491.75	6922.5	6070.5	7150
ATP5SL	9026	7769.25	8596.25	7597.25	9073	9496.5	9648.5	9484.75	9250	9618.5	10432	8738.25	9666.5	9289.5	8267.5
ATP6AP1	11112	10138.5	10225.8	10602.2	8847.5	11556.5	11544.5	11559.8	11557	11540	11274	11591.2	11572	11662	11509
ATP6AP2	11643	11574.2	11558.5	11643	10758.5	11301.5	11404.5	11427	11001	11529	11075.5	11585.5	11458.5	11514.5	11375.5
ATP6V0A1	1046	7024.5	9007.75	8263.5	6062.5	10714	10672.2	11189.8	10939	864	10802	11098.5	11293	10738	10646.2
ATP6V0A2	5159	4647.25	3496.75	5283.25	7552.5	6634	6578.5	6489	6567	5063	6116	6367.25	6560	6401.5	6488.75
ATP6V0A4	3707	3722.25	2039	3727.75	5125.5	2078.5	1866.5	911.75	3610	1776	4675	766.25	1126.5	1721	3228
ATP6V0B	10650	9921	9204.75	10541.8	9605.5	11423	11302.8	11338.8	11457	11389.5	10918	11166.2	11382	11544.5	11167.8
ATP6V0D1	10661	10065.2	8856	10435.5	8938.5	10097	10011.2	9966	9258	11288	7936.5	9121.75	9378.5	9063	8933.75
ATP6V0D2	9174	2966.5	5193.75	4527.75	55	1856.5	2331	2804	2767	540	2604.5	2574.5	1887	2120.5	2708.25
ATP6V0E1	11468	11496.5	11476.5	11515.5	11705.5	11606	11592.2	11454.2	11628	11519	11417.5	11544	11595	11602	11441.8
ATP6V0E2	6946	6307.5	6862.5	7305	8441.5	10934	9899.25	10988	11262	7309	10999	10228	9951	10331.5	10864.5
ATP6V1A	11389	11223.2	11237	11021.8	10772	11218	11180.5	11282.8	10483	11426.5	10932	11391	11390	11178.5	10972.5
ATP6V1B1	3704	3425.25	1914.5	1653.75	1199	5452.5	3293.25	4383.5	4960.5	3739	3888.5	6164.25	3983	6316	4044.75
ATP6V1B2	11747	10484.5	10965.5	11163.5	9290	11595	11438.5	11632	11404.5	11773	10984	11689.2	11439.5	11559.5	11451
ATP6V1C1	11574	6991	6393.5	8997.25	7182.5	7050	8246	8177.5	6973	11465	9722.5	7951.5	9008	9080	7676.25
ATP6V1D	10017	9756	9025	10365	11054	10428	10718.2	11117.2	10912	10197.5	10248	11184	10978.5	11062.5	10984
ATP6V1E1	11273	10182.5	10197.2	10287.8	10912	11418	11397.5	11515.2	11507	10970.5	11227.5	11375.8	11517.5	11527.5	11463
ATP6V1E2	2707	3321.5	1912.25	2987.25	5092	5513.5	4493.75	5253.75	4996.5	1919	5246	5310.25	5154	3068	7016.75
ATP6V1F	10592	10461	10732	11074.5	9241.5	11445.5	11526.5	11605.5	11515	10080	11598.5	11621	11598	11647.5	11521.5
ATP6V1G1	11487	11215.2	11538	11493	10413	11411.5	11472.8	11485.8	11108	11503	11519.5	11483.5	11598	11624.5	11397.5
ATP6V1H	9400	8069.25	8640.25	9263.25	9241	9036.5	9925.5	9812.25	9268	10339	9014.5	9907.25	9639.5	9830	8509.5
ATP7A	7197	7857.5	8341	6981.25	10180.5	4427.5	5860	3651.25	1400	4956	6116	4481.25	7631.5	3172	4435.25
ATP7B	5651	2642.75	3788	2141	2370.5	4746	3099.75	4435	5784	5018	3866.5	3382.5	3754	1925.5	2636.25
ATP8A1	425	4826.25	8194.25	5226.5	3709.75	1402	1843	1286	1330	1598	1586.5	1152	1971	1092.5	973.5
ATP8A2	505	467.25	1297.5	1926	2274	2184	2549.5	2511.75	2053	443	2414	2330.5	3251	1583	2549.5
ATP8B2	8438	6101.75	8035.25	6341.25	8359	8051.5	9666.25	8818.25	6470	9763.5	10066.5	9408.75	9457.5	7451.5	9005.25
ATP8B3	2588	806	2619.75	1022.75	5803	1587.5	1281.25	449.75	1512	2869	291	762.5	406	680	715
ATP8B4	194	3329	2757.25	2540.25	1822.5	5003.5	5830	4459.75	5657	190	4321	5794	4662.5	7398.5	4603
ATP9B	4870	6625.75	3465.75	4369.75	7810.5	4302.5	4279.25	3919	4023	5953	4455	3424.25	4176	3978.5	3705.25
ATPAF2	6040	3911.25	2126	3433.5	3322.5	4155.75	3880.25	3893.75	4147	5881	4281	3559.75	3857.5	3401	4207
ATPIF1	5528	10419.5	9702.5	10455.5	8312	8762	9953	10363.2	9664	5116	9271	9897	9951	10307.5	9641.25
ATR	7668	8829.75	8069.5	8549.75	9197	2475.5	1007	1079	1550	6301	291	748.75	949	913	908.75
ATRN	10057.5	6316	5589	5530.75	6803.5	7065	7314.25	7549	7059	9842	9065.5	7855.75	7506.5	7083	7678
ATRX	3094	9871.5	9647.5	9531	9730	2319.5	2964.25	2528.75	1296	3052	2873.5	3077	2268.5	2427.5	3195.5
ATXN1	6573.5	9622.5	8671.75	8698.25	8255	6741	6774.75	6926	7247	7488	5661	6795	6309.5	5901	6041.5
ATXN10	10650	10859.5	10883.2	10800.8	10037	4826.5	5657	5151.5	4759	10464	7245	4938.75	5866	4815.5	4619.25
ATXN2	8481	6272.5	7137.25	6244	5559	10345.5	10700.2	10400	10729	9691	10262	10429.8	10978.5	9868	10712.2
ATXN2L	6591	2076.25	2255.75	2801.5	4317.5	4747.5	4242.25	3968	3462	7903	5065	4865	4974.5	4391.5	4104.5
ATXN3	6817	8471.75	6142.25	5184	8439.5	6589.75	7051.5	6841.5	7581	7599	4355.5	6752.25	7875	7280	6989.25
ATXN7L1	5254	4354.75	5374	4168.75	4653	2385.5	1790	2001	2053	4620	543	1977.25	672	3172	1335.25
ATXN7L2	3458	1310	967	541.5	1074.25	4384	4455	3918.5	4274	3532	4901	3397.5	6481	4646.5	5256
ATXN7L3B	9099	9856	10570.2	9554	10682	9188	9397	9073	9440	7391	9501.5	9902.25	9807.5	9511.5	9430.5
AUH	6983	8075	6526.75	7451.25	5265.5	4962.5	6411.75	5927.75	4745	6082	5828	4804	6187	5130	5562
AUP1	10340.5	8880.5	8892	9072.75	11257.5	9409	9667.25	9326.25	9220	10565	9430	9056.5	8791.5	9755	9719.25
AURKA	10422	2569.5	3342.5	4947.5	8657	8875.5	8877.75	9705.5	7609	8015	9977.5	7149	10204	9238	9035.5
AURKB	10414.5	559	1510.5	2904.75	3410	8032.5	7763	8049	5709.5	10202.5	8996.5	6524	8111.5	6622.5	8510.75
AURKC	3070	1567.5	2583.5	1500.5	1741.5	1797.5	1349	1680.75	1731	2869	2261	1268.75	1351.5	1497.5	1591.25
AUTS2	3982	10729.8	10804.2	9815	8854	7899.5	7323.5	9364	8389	4973	9722.5	8089.25	8202.5	9366	8144
AVEN	3195	4057.75	4606.25	3182.25	4731.5	5038	6047.5	4995.5	5166	2710	5780	4815.25	6120	5633.5	6066.25
AVIL	1547	4416.75	2628.75	4267.75	3023.5	2346	2118.25	1938	1817	1813	2414	2105.25	1558	2789	1831.75
AVL9	5908	8036.75	8261.5	6340.5	7794	4660	4611.25	4786.25	4226	5838	4403.5	4366.75	4564.5	4758	4840.5
AVP	2772	86.5	280.25	153	1520.5	2480.5	3170	2223.25	2264	2932	1448.5	2115.25	2422	1818	2265.5
AVPI1	8972.5	7366.5	6236.75	8127.25	8361	10438	10097.2	11220	10493	8593	8729.5	10960	10453.5	10926	11169.5
AXIN1	5638	3004.75	2812.5	3995.75	2816.5	8857	7936	8380	8673	5603	7541	8101.25	8873	7322	8328
AXIN2	3405	7789.25	8706.25	7022.5	7350.75	5656	4363.5	5625	6287	5122	6139.5	4508.5	3391.5	3859.5	4962
AXL	2651	9571.75	8623.75	9102.5	8137.75	9036	7631	8870.25	8221	8532	9534.5	7730.25	6537.5	9730	6167.5
AZGP1	2757	10929	8315	10725.8	10750	3295	4659.5	3979.75	10816	1106	3866.5	6564.25	4683	2054.5	7295.75
AZI2	7183	7337	5999.75	7030.5	6272.5	6238	6820.75	6631.75	5442	7652	6378.5	7986.5	5741	6489.5	6118.25
AZIN1	11485	10697	10636	10767.5	10217.5	10733.8	10543.8	10617	10424	11210	11268	10815.5	10556	10853.5	10332
B2M	11507	11820.5	11808	11834	11777.5	11762.5	11733.5	11732	11739	11712.5	11491	11790	11779	11767.5	11691.2
B3GALNT1	6897	4867.5	5751.75	4318.75	3340	5236	4010.25	3738.75	2982	5795	1448.5	2920	3199	5532.5	4516.75
B3GALNT2	7942	8794.5	7362.75	8460.5	9259.5	3840.5	3959	3539.75	3050	7644	3351	3310.75	3857.5	4256	4197.5
B3GALT4	2928.5	5010.5	5248.25	4660	5465.25	4941.5	3848.25	3517.5	4676	4186	3351	3088	3435	4485.5	3273.25
B3GALT5	879	1965.25	1319.75	928.5	995.5	408	1003.5	985	1786	940	771.5	1160.25	1652.5	481.5	1015.5
B3GALT6	5139	5273.5	5265.25	5651.75	5098	6964.75	6722.5	6756.5	6774	5280	6733	7266.5	7171	7124.5	6907.75
B3GALTL	9284	5202.5	6297.75	5766.25	7853	5712.5	5479	5867.75	5596	10133	6023.5	4842.75	7127.5	4522	6390.75
B3GAT1	3222	437.5	1909.25	584.5	779	2339	1908	2168.75	2748	3083	1826	2226.5	1748	1546	1491.5
B3GAT3	7424	2889.75	2090.5	2951.5	8612.5	6589.5	7312.5	6597.5	6841	8918.5	4816.5	6424.5	6264.5	8203.5	5559
B3GNT2	9852	8244	8491.75	8407	9078.25	5143	3618.75	3865.75	2019	10277	1772.5	4671.5	3225	3202.5	3925.5
B3GNT4	1615	1686.25	3725.25	2600.75	890.75	1340.5	1949	1485	2236	1578	1219	1202	1602.5	1274	1191.75
B3GNT5	4813	9482.5	7900.5	9507.75	7822	1320.5	1342.25	953.75	426	3910	2083	789.25	554	1741	1028.5
B3GNT7	2882	3096	2837.75	1901.25	3871.5	641.5	662	543.25	325	3725	1448.5	610.5	201.5	457	823.5
B3GNT8	2811	567	497.75	798.5	766	2975	2925	2681.5	3179	3033	3747.5	3339.5	3342	3483.5	2920
B3GNTL1	3561	1908.5	1014	2382.75	2933	3472	4373.75	2673.75	3231	3301	4793.5	3064.5	4450.5	3232.5	2971
B4GALNT1	2662	919	2578.75	951.75	703.5	2298	1238.75	1139.75	3914	3971	619.5	1955.75	1079.5	2014	997.75
B4GALNT2	2204	487	1822.75	517	308	270.5	353.25	366	639	1896	10	541.25	475.5	327	215
B4GALNT4	3122	1337.75	2088	1268.25	800.5	3209.5	3855.5	3882.75	1917	3409	1726	3798.25	3725.5	5179.5	4238.75
B4GALT1	540	6255.75	6505	6238.25	11266	6745	7185.25	6777.5	7871	971	5224.5	7093.25	6419.5	7509.5	5992
B4GALT2	8054	4181	5591.75	4321	2958	2792.5	5194	4411.5	5086	9709	5246	3795.25	5611	5317	4427.5
B4GALT3	8055	5967.75	5877.75	5662	5914.5	10026	9426.5	9567.75	9960	8701	10693.5	9795.25	9712.5	9645.5	9297.75
B4GALT4	8526	5260.75	3644.25	3640.5	6903.5	6953.5	7825	7964.75	7704	7371	7482	7950	8162	7548	8125
B4GALT5	10889	6955.5	7398.5	8301.25	10191.5	10641.5	10756	11113.2	10286.5	11326	11063.5	11106.5	11014	10831	10681.5
B4GALT6	7148	5449	8773	5554.75	4999	3318	1964.25	4562	1885	7718	3994	4568.75	3577	3927	4869
B4GALT7	5768	3336.5	4031.75	3410	5506.5	8949.75	8945.25	8698.25	9171	6328	8319	8458	8701	8640.5	9291.5
B9D1	3392	2402.25	2661.5	1907.25	4309.5	3620.25	4695.75	6195	3904	3578	6340	4495.75	5375.5	4459.5	6896
B9D2	3428	1826.5	2311.75	1137.75	2745	6113	6606	6515.25	6272	3649	7264	6121.5	6613.5	7661.5	6005.75
BAALC	4574	2144	3502	4293.5	3876	4936.5	4768	6832.25	3960	5399	3651	5317	7631.5	8628	4428
BAAT	345	896.5	1905.5	1898.5	409	514.5	1802	227.5	10237	328	1022	872.25	8111.5	80.5	4579.75
BACE1	4848	5930.75	5138.5	6412.75	5992	3637.5	2981	3685.75	4593	7293	2642.5	4475	826	4256.5	4460.5
BACE2	11555	9014.25	10880.2	10028.5	10678.5	10430.5	10463.5	10310.5	10523	11633	10947.5	10742	10788	10535	10738.2
BACH1	8170	9105.75	8699.5	9334.5	7594	2856.25	3229	3162.75	2641	8011	3542.5	2724.5	2508	2886.5	3326.5
BACH2	2924	3535.5	4934	3050.5	2733.5	2619.5	2551.25	3037.25	2422	2957	1543.5	2347.25	2737.5	2660	2718
BAD	5010	5989.75	5872	5523	2978	7424	6953.25	8003.25	7614	6023	5753.5	7733	6095	8027.5	7173
BAG3	6616	10451.5	9500.5	9713	6516.5	9588	9471.75	10243.5	8482	8183	10225	9232.5	9344.5	8645.5	9817.25
BAG4	6684	8610.25	8738.5	8047.25	7079	4892.5	6097.5	5273.5	6949	7658	5471	5655.5	4334.5	5467.5	5634
BAG5	7697	10685	10299	9590.75	9507.5	9147.25	8828.25	8965	9752	6619	8864	9376	9082.5	8774.5	9177.5
BAIAP2	4825	5581	5243.75	3150.5	5571.5	6935.25	7441.5	7874.25	8990	6575	9081	8093.5	8736.5	7342	6034.75
BAIAP2L1	7490	5432	3145.25	3623.75	3925.25	6026	8234	9183	7994	9726	7577	1467.75	10128.5	9341.5	6689.5
BAIAP2L2	4170	664	2187.25	1078	2771.5	7757.5	8328.5	9288	7099	4416	6825	8150	11220.5	10252	7939.25
BAIAP3	3054	881.5	503	489.25	2424	393	1857.75	655	532	3108	1172.5	812.5	2058.5	800	1166.75
BAK1	7740	3030	2269.5	1394	4669.5	5677	5395.5	4547	5489	7482	5201	4577.5	4354	5466	5314.75
BAMBI	11650	4258.25	9812.75	8600.5	9464	11396	11244	11390.8	11288	11244	11082.5	10907	11428	10687.5	11261.2
BANF1	1477	9736.5	10817.5	10472	10703.5	10998.5	10952	11135.2	10953	2197	11317.5	10833.5	10781.5	11112.5	11200.2
BANK1	195	2288	988.75	4775.25	568	1953.75	860.5	1805	1612	195	1635.5	1322	1800.5	457	1388.5
BANP	6146	6792	6185.5	7153.5	7986.5	10779.2	10816	10852.2	10545	5994	11196	10786.2	11216	10761	11203.2
BAP1	6939	6946.25	4258.75	5384	7203	7574.5	7190.25	6738.75	7078	8890.5	6957	7480.75	7019	5777	7270.25
BARD1	8400	6825.5	5053.75	5346.5	5946	6801	7115.25	6561.75	5957	8470	7014.5	6548	6744.5	6209	7331.5
BARX1	4117	1721.25	923.5	778.75	765.5	1102.5	1963.75	1197	1844	3953	1219	1092	1748	1866.5	2060.5
BARX2	1884	1279	3489.25	1797	1907.5	1593	616.75	530.75	1169	2009	267.5	321.5	292.5	299	720.25
BASP1	5817	9801.5	9360.75	10205.2	10268.8	9679.5	9290.25	10046.2	9576	7010	7437	10379.8	9639.5	10107.5	7749.5
BATF	4563	3364	5498.5	6047	2553	6110	5196	4167	4543	4041	2083	5066.25	4662.5	4302	3161.5
BATF2	3304	734.25	1707.25	2781.25	2475	4498	4171	4135.5	4333	3486	3600.5	4404.5	3983	5845	2871.75
BATF3	2964	2909.5	2472.5	2162.75	2445	4826	4670	3613.25	4113	3280	867.5	3760.75	4475	5344.5	4514.5
BAX	7771	2685	3433.5	3228.5	6517	8428	9356.75	8349	8805	8657	9134	8691	9782	9056	8982
BAZ1A	7248	9377.25	7768.25	9035.75	9813	7675.5	8076	7365.75	7273	5320	7561	8157	7706	8349	7335
BAZ1B	10345	5508.75	5894.75	6076	10550.5	8325	8898.5	8587.5	8641	9770	9271	8614.75	8719	8764.5	8832.75
BAZ2B	5329	9168.5	9621.25	9123	8850	7912.75	7931.75	7667.5	8652	5123	8729.5	7983.25	8944	8872	8255.5
BBOX1	94	10168	7888	8116.5	6864.5	1116.75	445.5	532.5	4920	84	656	478.5	64	1583	683.5
BBS1	4555	6599.75	7493.25	6056	6834.5	7039	6455	6879.25	5558	6510	6862.5	7266	6595.5	6604.5	6063.75
BBS10	6295	5432	6197.75	4549.5	5619	3091.5	3778.75	4183.25	3457	6087	3674	4229	3146.5	3071.5	5094
BBS12	2797	2601.25	3783	3377.5	3192.25	3349	4644.25	4756	3869	2929	3216.5	4642.75	5223	4892.5	3696
BBS2	7443	9028.25	9171.75	8230.75	9272	7992.5	7491.25	8059.75	7858	8449.5	8896	8166.75	6879	8185	8551.75
BBS4	6212	4916	6402	5406.25	5542.5	7052	7155.75	7231.25	7779	6820	7501	7386	7989	7281.5	7739
BBS5	6710	1578	2516.75	3224.5	2581.5	3362	2483.5	2927.75	3390	7566	2083	2455.75	4381.5	3565	3673.5
BBS7	4341	4687	3714	4920.25	3908	5158	6615	5751.5	5297	4847	6695.5	6768.75	6652.5	6489.5	5786.25
BBS9	4701.5	4171.5	1885.5	3097	5076	4667	5233	6108.5	5525	5489	6093.5	5900.25	5720	5578.5	5991.5
BBX	10410	8333.5	9694	8537	7408.75	8795	8097.75	9310.5	8469	9915	8768	9405.25	8582.5	9063	9355
BCAN	4292	2540.75	8815.5	3426.75	1377.5	4202	4785.25	5182.5	5586	5207	11757	4290.5	8222	3487	4694
BCAP29	11312	8999	9069	10119.5	9135	7873.5	8443.25	8501	6441	9667	6247	7904	7103	8505	8018
BCAP31	11342	10443	10066.5	10814	10816.5	11296	11247.8	11199.8	11402	11260	10755.5	11308.2	11350.5	11495	11190.5
BCAR1	6130	2020.25	4629.75	2283.5	2086.5	6276	6175.5	6565.5	6132	6978	5089	5653.75	6241	6745	5559
BCAR3	6059	6330.75	4780.25	3645.25	4488.5	8602	7384.75	8893.25	6705	6750	4403.5	7523.75	8335	6551.5	7290
BCAS1	1572	1631.25	2361.5	1479.25	735.5	1337.5	1637	441	745	1486	192.5	1067.5	1478.5	621.5	987.5
BCAS3	6573.5	3015.75	3317	2140.5	3052.5	3521.5	8684.25	3978.25	1743	8611.5	5142.5	3250.25	10214.5	1361.5	3089
BCAS4	3651	1319.5	3849.25	2845.75	3586.25	6061.5	7021	5372	3699	3856	2957	4784.5	5315	5338.5	5462.25
BCAT1	1330	6433	3310	4470.5	3697.5	3971.5	4953.25	5309	3131	1811	4793.5	5984.25	4202	6721	5949.75
BCAT2	5705	6877.75	6332	7305	4768	7431.5	6660.5	7611.75	6270	5608	8576.5	6297.25	7060	7767.5	7267.5
BCCIP	6881	9329	9677	9580.75	9124	8619.5	8595.25	9793	9178	4797	10042	9247.25	8701	9658	10102.5
BCDIN3D	3279	3082.75	4508.25	3643	3057	7520.5	5953.5	7139.25	7412	3224	9660.5	7037	5903.5	7199	7976.5
BCHE	9006	6565.25	10649.2	8332.25	5045.5	7268	7084.25	10311	9089	5074	11356.5	9630.25	9472	7199	10772.8
BCKDHB	9750	4504	4755	4501	4199.5	5128.5	6123.25	5189.5	6464	9518	4901	5166.5	4999	4075	4514.75
BCKDK	7962	5374.25	3026.5	4910.5	5745.5	10936.5	10330	10590.5	11005	9017.5	10650.5	10735	10682.5	10520.5	10581
BCL10	5866	9469.5	8527.25	8999	7084	3572	2812.5	2545.25	1901	6111	1826	2555	1931	2282.5	2211.75
BCL11A	2421	10536.8	9956.75	9705	7115.5	4386	2624.5	4167.5	5568	2196	9304.5	3215.5	3279.5	3377	3667.25
BCL11B	2507	10206.5	8721	8940	9011.5	3279.75	4287.25	3563	2231	2543	3017	4840.75	2774	2403	744.25
BCL2	6938	7526.75	7773.25	7705.5	7481	7039.5	9146.75	7641.25	6655	5830	5828	8973.5	8961.5	6770.5	8427.5
BCL2A1	6941	2049.75	5912.25	8670.75	8487	3729.5	4899	4898.75	4872	5878	3424	4552	4407.5	3339.5	4254.5
BCL2L1	9295	5673.25	6098.25	6144.75	3152.5	10416.5	10844	10888	10916	10345	10552.5	11058.2	11158	10704	10502.8
BCL2L11	2931	5859.75	5485.75	7000.25	5139	2805	3124.25	3602	1431	2705	1125.5	2673.25	2967	1939.5	2441
BCL2L12	3950	3185.5	2679.25	3639.25	3469.5	8992.25	9307.5	9563	8684	3306	10502	8676.5	9728.5	9389.5	9634.5
BCL2L13	7785	8044.25	7832	7531.5	7704	10753.5	10696.8	10944	10705	7127	10385.5	10865.2	11044	11099.5	11014.5
BCL2L2	6454	8962.25	9027.25	8328.5	8040	8532.5	9434	9094.75	8814	7283	7138.5	9910	9531	8594.5	10060.2
BCL6	5355	11460.5	11129.5	10991.5	9497.5	9478.5	8093.75	8920.75	10063	8858	6977.5	9260.5	7103	10287.5	9018
BCL6B	2505	3594.5	4318.25	2995.25	2404.5	3518.5	4364.75	4619.5	4400	2472	4839.5	5358.5	4334.5	5272.5	4695.25
BCL7B	10705	6365	6623.75	6741.25	6908	8346.5	8714.75	8532.25	6961	10561	7646	8798	7296	8594.5	8590
BCL7C	5861	7225.25	6962.25	5276	2000	8882.5	8549.75	8493	9319	5961	9049.5	8953.25	8239.5	8922.5	8666.5
BCL9	6102	3316.25	3356.75	2345.25	4245	7541.5	7445.25	7093	6767	6941	8644	6966.25	7570.5	6901.5	6798.75
BCL9L	4771	3692	5054.25	4272.75	4002.5	4078	4892.5	4890.75	3336	6976	4124.5	4992.5	4381.5	4602	4630
BCLAF1	11099	11413.5	11478.5	11343	9651.25	10045.2	10429.2	10241.2	10037	10510	10685.5	10415.8	10586.5	9928.5	10601.5
BCOR	8590	5423.25	4177	4958.25	7299	8021.75	8417	7726.5	7162	8141	7372.5	8307.5	9178.5	7451.5	7740
BCORL1	3810	4996.25	5761	4801.5	2194	3717	3903.25	4104.75	3785	4002	5286	3702.5	1652.5	3565	4145.75
BCR	5428	5587.5	5689.25	5678	7509.25	4198	4310.5	3753.75	4578	6030	4336.5	3450.5	3391.5	4025.5	4395
BCS1L	7335	6860.5	7625.25	6924.25	8212	7859.25	6779.25	7453.75	8011	5834	8398	6807	7316	7316	7940
BDH1	5322	5457.5	6318.75	6298	5249	4010.5	4987.5	4007.5	6577	4406	438	5684.25	4475	1925.5	3409.5
BDKRB1	785	2311.5	2222.5	1319.25	1477.5	1355	1426.5	803.25	994	919	1497	599	515.5	1002.5	747
BDKRB2	1308	4496	1884	3486	3863.5	1395	2786	886	1708	1356	1320.5	1178.75	1351.5	1228.5	1954.75
BDNF	808	1180.25	3253.25	1517.25	3181.5	1059	1653	1861	4407	1064	2746.5	1829.25	2307.5	1818	2291.75
BDP1	6926	9527	8996.25	9204	7906	3631	2778.75	2003.75	3538	6296	2138.5	2324.5	2268.5	2462.5	2753
BECN1	10436	9396.75	9669.5	9691.75	10157.5	8441	8479	9078.75	7781	9610	9152	9322.25	7969	7248.5	9103
BEGAIN	1939	1222.25	2669.5	1381.25	3706	2618	3067.5	1640.75	2484	2138	2222	1551	3857.5	1497.5	2782.25
BEND4	1921	440	1104.5	646.25	791.5	3499	1797	1665.75	4293	2141	1172.5	1475.75	1931	1447.5	1941.25
BEND5	1713	2837.5	3734.75	1669.75	2261.75	2783.5	3912.25	5502.25	2090.5	2602.5	5306	6723	9328.5	5127	4767.25
BEND6	646	2155.75	1111.5	1273	1144	1260.5	2027	1002.5	1529	966	144.5	2210.25	1432	3339.5	504.25
BEST1	8906	3527	3948.5	2795	3587	8064	7383.75	7455	7308.5	6652	6455.5	6901.25	9839.5	7511	7923.5
BEST4	1498	329	150	591.75	1148	1347.5	1775.5	1362.25	782	1626	819	1485	1931	1477	2259.5
BET1	11469	7693.5	7731.25	8921.25	9668.5	7418.5	7394.5	7955	5678	10533	8496	8263	6879	6707.5	7976.75
BET1L	6951.5	5110.25	5361.75	4369	6287.5	4661	4889.75	4496.75	4198	6888	4816.5	5474.5	3983	4672	4691.75
BEX1	1194	2217.75	2636.5	1713.25	733	6113.5	6866.75	7644	5890	700	7838	8582.5	7079.5	6092.5	8517
BEX2	956	5783.25	6743.75	5817.25	4082	6446.5	4473.75	5068.5	5459	1333	10089.5	6612.75	8819	7850.5	9326.5
BFAR	11281	6853.25	7940.5	7242	5123.5	9031.25	10029.5	10000.5	9851	10470	9722.5	10341	10394	9147	9874.25
BFSP1	2909	1167.75	1162.25	1169.75	2712.5	2597.75	4887	4371.25	2046	1763	4377.5	4462.5	5588.5	3405.5	4449.25
BFSP2	1481	534.5	531.5	502.75	178.5	1594.5	1679.5	1810.5	2129	1452	4839.5	1719	4791	1526	1637.25
BGN	3074	7091.25	8714	7432.25	7881.5	11672.8	11604.2	11677.2	11701	3495	11441	11546	11470.5	11368	11056.8
BHLHB9	1660	2403	2000.75	1782.25	5021.5	3561	3865.25	3899.25	3371	2043	4772	5132.25	4638	4667.5	4143.75
BHLHE22	2559	4014.75	6199.25	5333.75	4071	2724	3737	3285.75	2656	2316	2642.5	4664.75	4050	4758	1508.5
BHLHE40	9653	10541.5	10618.8	11051.8	10102	11082.5	10849	11192.2	10331	9911	10598.5	11438.2	10159	10978	11081
BHLHE41	8255	7958.25	6498	8628.5	5489	5751	6261.5	8065.75	4693	9664	4049.5	6225.75	8582.5	6260	6077.5
BHMT2	1077	4166.5	3089.75	2221.5	772	1279	1221	704.75	8301	1185	867.5	526	625	516	649.75
BICD1	6347	2543.75	2316	2818	2498.5	2994	4469	2951.5	1807	4887	3600.5	2483.75	4909	3368	3163.5
BICD2	6659	10770.5	10309.2	10437	9369.5	8982.5	7159	7989.75	9261	6610	7721	7192.25	8719	7564.5	7834.75
BID	6112	4902.75	5421	5485.75	5844	6012	6044.75	6884.75	6498	5000	8143	5781.25	6560	5578.5	6354.25
BIK	1496	1847.75	1209.75	2242	3899.5	1288	322	1217.5	1008	1381	267.5	39.75	1126.5	1629	211.75
BIN1	5963	6504.75	6262.25	6914.25	6721.5	8974.5	7002	8058.75	9231	8024	9223	7625	5248	8872	8143.75
BIN3	10158	6097.5	6388.75	6694.5	9711.5	6171.5	6110	4852.25	6609	9537	3216.5	4374	3312	3094.5	6774.25
BIRC2	9593	10534	10542.5	10974.2	8270.5	9293	8793.25	9480.75	9769	8598	8358	9644	8654.5	10069.5	9299.75
BIRC3	286	4198	2011.75	9293.5	3621.5	10728.5	10161.8	9793.25	11488	318	9573	10248	9965.5	10385	10629
BIRC5	9405	2100	611.75	3468.75	9306	8058.5	7730.25	8520.5	5811	8149	7209.5	5833	9022.5	6893	9500
BIRC6	10299	10155.5	9756.75	9990	10570	6088.25	6157.25	5896.25	5629	9942	7800	5743.25	6857	6680.5	6087.75
BIRC7	4797	3239.5	8555.25	4202	2859	9150.5	8348.25	6813.75	9520	5049	11196	6575.5	10556	10326.5	9042.5
BIVM	7626	6759.25	7734.25	7337.25	7610.75	6890	7092.5	7896.75	7206	7353	8046.5	7578	6264.5	7629	7813.25
BLCAP	10740	10738.5	10690	10303.5	11542	9008.5	9648	8805.25	9327	9821	9560	8785.25	10065.5	9830	8421.25
BLK	2929	911.25	2028.5	992.25	815.5	1943.5	442.5	634	819	2960	241	141.25	72.5	79.5	168
BLM	7365	1966	3642.5	3578.75	5117	4435	4916.5	4658	3673	5937	6270.5	2934	5497	4110	4959.5
BLMH	6745	9157.25	8246	9297	7071.5	7115	6186.5	7679	7610	7355	8560	7284.75	5986.5	6254	7468.5
BLOC1S1	2183	9139	9952.25	9694.5	9983.5	9645.5	9755	9294	10486	3803	10563.5	8116	9052	9961.5	10138.5
BLOC1S2	7432	10567.5	10456	11041.5	10737.5	2457	3165.25	3402	1304	7166	1172.5	3337.5	2229.5	3401	3939.5
BLVRA	10840	9962.5	9601	10047.5	9333.5	9846.5	9994	10742.5	9908	9950	7838	10751.8	11283	10211.5	10383.2
BLVRB	4719	9212.5	8955.25	9890.75	7863	8190.25	7852.25	7546.5	9997	5108	9347.5	9051.25	7445	7451.5	7459
BLZF1	7681	5630.75	4094.25	5414.75	4610.5	11466	11065.2	11242	11702	6719.5	11238	11276.8	11303	11278	11596
BMF	3012	2287.75	2756.5	1465	2966.5	3873	4244	3776.25	4844	4654	4675	4375.5	3675.5	3539.5	3546.75
BMP1	5919	4918.25	5681.5	4482	3324	7169.5	6438.25	5836.75	7330	7276.5	4151	5804	5967	6831.5	6427.25
BMP2	1718	4794	3231.25	2739.5	3168	2046.5	1544.75	1939.75	3605	1849	3073	1332.5	1217	882.5	1347.25
BMP2K	7715	6467	5334	7357.25	9105	4188.75	4165.25	3825	3719	7732	2674.5	4292.25	3054	4560.5	3693
BMP4	630	2391.5	1023.25	1263.25	2233.25	4312	4415.25	4079.25	6458	1763	3651	4134.5	4541	4968.5	4279.75
BMP6	1463	3090.75	4022.75	1919.25	1457	2978	3072	3010.5	3962	1728	2604.5	2196.5	1079.5	2920.5	1539
BMP7	1546	5272	6379	5017.75	7258	2401.25	1671	4027	3683	1338	1270	3434.75	4078	3104	4725.75
BMP8B	7968	2331.25	3209.5	2041.5	3028.5	4939.25	3698.5	3497.75	4503	7974	3570	4192.5	3225	2389	4830.5
BMPR1A	7758	8255.25	8209.5	7301.5	6658	5653.5	5659.25	5742.25	4452	8316	5935	6016	4354	5412.5	5765.5
BMPR1B	4748	2134	4795.5	3868.5	2882.5	1663.5	1444.5	2479.5	1200	3747	4723	1431.5	1079.5	461.5	1429.25
BMPR2	9891	10409.2	10117.2	10850.5	8375	8227.25	8709.75	8907	7206	10562	7838	9323.25	8582.5	8159.5	7850.75
BMS1	9340.5	8119.75	4883.75	6946.75	6744	9141	9924.75	10138	9796	8062	10808.5	9380	10002	10264.5	10116.8
BMX	335	2264.25	433.75	880.75	1206.25	1362	1630.5	1914.75	1282	261	1407.5	1822.75	3279.5	1566.5	2171.25
BNC1	828	5235.25	4090.75	2640.5	4425.5	2265.5	769.25	427.25	2199	1047	1125.5	669.5	949	882.5	633.75
BNC2	7474	6023	9353	5660	7309.5	6100.5	6733.5	8716.75	4124	10114	7459	7908.75	8371.5	7161.5	7803.5
BNIP1	3583	3642.25	2815.75	3527	4722	5162.5	5089.5	5502.5	5049	3320	5961.5	4707.75	5198.5	5633.5	5953.75
BNIP2	10137	9252	7170.25	9104.5	8604.5	8840	8663.25	8538	6965	10599	9014.5	8142.5	8791.5	8425.5	8875.25
BNIP3	11660	10096.8	9234.5	9395.75	9529	10051.8	9709.25	10113.5	10529	10142	10078.5	10392	10805.5	10355.5	10247
BNIP3L	11151	11186.5	10956	11135.5	9821	8663.5	9220.75	8843.75	6013	10841	10066.5	9769	8239.5	7846	9195.5
BNIPL	1888	4582.25	2445	3246	390.5	2732.5	1438.75	1565.5	2699	1831	1879.5	1667	1558	2135.5	2056.5
BOC	3429	10429	10131	8937.25	10595.8	1377.5	1339.5	1490	638	5535	213.5	1459.25	1126.5	1405	398.5
BOD1	9727	8607.25	9473.75	8191.5	9043.5	9747.5	10003.8	9422.5	10371	10201.5	10747	9828	10159	9759	10088
BOK	4015	4780.25	2838	5092.25	3937.5	6514.5	6269.5	5355	8109	5063	6629	6739.25	6498	6633.5	5622.25
BOLA1	5973	4000.75	3988.25	4421.75	2923	4577	4495.75	4332.25	4632	5636	3724	5063.5	4428.5	4016	4439
BPGM	10112	5035.75	3797.25	4898.25	4945	5414	5583.5	5796.75	3982	9216	5409	5877.5	4407.5	4803.5	5222.25
BPHL	7150	5051.25	3836.25	4741.25	5266.5	9286.75	8050.25	8821.75	10348	6185	10358	9519.75	8258.5	8223	8532.25
BPNT1	8820	3334.75	3190.25	3245.25	5107	6381	6587.5	6680.25	8070	8942	6606	6063	6376.5	6882	5904.5
BPTF	7353	9830.5	10293.8	9113.25	8151	4548	4169.5	3409.5	4950	7105	4610	4605.25	3111	2920.5	3476
BRAF	7317	7236	7120.25	6464.5	5914.5	2550	2343.75	1331	2507	8692	1125.5	2043.25	1887	1979	2747.5
BRCA1	7691	3437	921.5	2783.25	3924	4802	5578.25	6497.25	4533	6492	6436	5090.25	6724	4148.5	7005.5
BRCA2	6014	1625.75	1813.5	1922	1253	1642	1018.25	449.75	1301	3273	819	682.25	351.5	515	710.75
BRCC3	8516	6887.75	7418.75	7289.25	6908.5	4429.5	4790.25	5004.5	3488	5565	4078	4546.5	4745	4535	4481.25
BRD1	5791	8114.25	7632.25	6581.25	7481.5	5397	5487.25	5237	3287	6917	5635	4571.5	6613.5	4365	5438
BRD2	11167	8491.25	9384.5	9618.5	9529	11075	11202.2	11031.2	10971	11079	11463.5	11123.8	11210.5	11211	11346
BRD3	5606	9851.25	10038	7783	9478.5	8001.5	8867.25	8151.75	8967	7093	8786	7904	9666.5	8240.5	8499.75
BRD4	5191	9223.25	9750.75	8145	10889.5	2628	2548	2161.25	2256.5	7004	1772.5	2377	1392.5	1361.5	2236.25
BRD7P3	227	253.5	481	1020.75	505	4774	5488.75	5272.25	5372	311	6399	5206.75	5541.5	5659.5	6007
BRD8	3815	9122	9521.25	8969.75	10131.5	7441.5	7776	7521	7873	3911	8786	7926.5	8388.5	8311.5	8794.25
BRD9	6089	6090	8078.5	6894	8035	10442	10155	10189.2	10614	4679	10840.5	10452.5	9728.5	10440.5	10465
BRE	10214	7963.5	7992.75	7385.75	7900	8717.5	8735.5	8735.75	8197	10657	9430	7830.25	8944	8333	8260.5
BRF1	4845	1888.75	1356.25	477	2531.5	4274.25	5081.5	4115.5	3410	5197	4377.5	4088.25	5131	4256.5	3966.75
BRF2	5184	5163.75	6866.75	6243.5	4616	7181	5948	5933	7319	5171	6047.5	6162	4428.5	6945.5	6665
BRI3	10487.5	10545.5	10951	11010	11201.5	11199.5	11241.2	11407.8	11170	10931	11162.5	11393.2	11414	11348.5	11077.8
BRI3BP	8511	9085	8952	10629.5	8885	5485.5	5829.25	6369.25	5763	8539	5065	5336.25	5866	5675.5	5972.5
BRIX1	10319	3579.5	3989.5	3085.75	7055	9591.5	9710.75	10525.8	8613	9895	10212	10416.5	9344.5	10911.5	10741.5
BRMS1	6937	6568.75	7951.5	7193.25	7052	10884	10376.5	10813.2	10992	7310	9925	10528.2	10214.5	10880	10504.2
BRMS1L	4481	7336	8313.75	7534	8244	4747.25	4671.25	5051.25	4121	4514	5430	5531.25	4564.5	6520	5665.75
BRPF1	4703	5067.5	6155.25	4585.25	6281	10751.8	10359.5	10222	10447	6413	10483	10687.8	10517	10546	10357.2
BRSK1	4201	1833.75	3794.5	3240.25	1060.5	8016	5862.75	7996.75	7413	4223	7350.5	7581	7210	8267.5	7443
BRSK2	3612	235.25	552	318.5	779.75	1751	2448.5	1963.5	3518	3778	6270.5	1843	776.5	1874.5	1963.5
BRWD1	7203	4179	5709	5623.25	5470	7295.5	6939	7972	7485	7231	7860	8764.5	7550	8323.5	7669.5
BRWD3	5551	3488.25	4310	3130.5	3576	2095.5	3701.75	2232.25	2330	4779	1924.5	2918.75	4974.5	2466.5	2948.25
BSDC1	8076	8592.5	7977	8469.25	9631.5	9199	9084.75	9701.75	9747	7897	8122.5	9843.75	10412	10243	9156.5
BSG	11651	8881.5	9483	10322	7736.5	11355	11391	11463	11046	11709.5	11512.5	11448	11444	11567	11075
BSN	2780	391.75	995.75	319.25	203	3004.5	1252	2023.25	3301	3086	3273.5	1752.75	1040	1479.5	3210
BST1	7293	2561.75	3114.5	2277.75	3460.5	3322	2140	2880.5	1351	8731.5	1497	2729.25	2011.5	2898.5	1627
BST2	881	4822	3628.25	6340.5	4322.5	10245.5	9938.5	10547.2	10819	1130	7459	11429.2	10091.5	11325	9799.75
BTAF1	9092	10322.8	9896.5	9805.5	10098	8483.5	8298	8763.25	8369	8193	8786	8041	8533.5	8571	8744
BTBD1	10296	10405	10497.2	10981.2	11328.5	7206.75	8070.25	7535.25	5883	10194	7766	7807.5	8315.5	7103.5	7773.5
BTBD10	4779	6142.75	5800.5	6813	9562.5	6681	8110.75	7022.25	6115	5746	6247	7019.25	9487	7030.5	6441
BTBD11	811	6815.25	5342.5	4272.25	5623.75	3214	2945.5	2367.25	2636	889	619.5	2490.75	2847	2538	2198.75
BTBD16	1182	2102.75	62.75	12	538.5	1621	397.75	320.5	3221	1283	81	224.75	515.5	461.5	1262.75
BTBD3	10124	9021	9698.75	7688.25	7748	8135.5	8977.75	9490	7029	10226	10552.5	8939.75	9008	10109.5	10251.8
BTBD6	6138	9076.75	8634.5	8337.25	8722	9520.5	9385	9993.5	10003	4788	7766	9846.75	9839.5	10018.5	9548.75
BTBD7	4304	8634.75	8267.75	7289.25	9697.5	5808.5	5584.25	4922	6720	5589	4698.5	5437.25	5675	5200.5	5350.75
BTC	530	8675.75	2416.75	3003.25	363.5	585.5	510.25	494	831	507	505.5	925.5	515.5	549.5	1167
BTD	8121	2136.75	4149	2630.25	6715	6403.5	5228.75	5058	7373	8042	4355.5	6565.25	4860.5	5578.5	4813
BTF3	11287	11736.5	11763	11745.8	11750	11659	11638.5	11695.5	11587	10992	11739.5	11690.2	11640	11628.5	11709.8
BTF3L4	11447	9615.5	9634.5	10160.8	10225	8670	8793	9041	7300	11479	8696.5	8617.25	7744.5	7808	9317.25
BTG1	11096	11568	11665.5	11582.5	11285.5	11405.8	11445.2	11380.5	11234	11023	10808.5	11576	11461	11560	11516.5
BTG2	3171	9479.25	8059.25	10165.5	8152.5	6611.75	5479.5	6693.75	5023	6168	4500	6842.25	4841	7976	4722.25
BTG3	10447	10293.8	9630.25	10328.2	8872	9484	8604.5	10322.5	8009	9935	8204.5	9253.25	9782	10735.5	10102
BTK	810	1873.75	265.25	3282.25	3252.75	5780	4693.25	5374.25	6042	809	5557	5772.75	4703	7120.5	4730.5
BTLA	423	1802	2634	3535	1708	2421.5	2097.5	2207.75	2444	511	1497	2819.25	2468	2221.5	1598.75
BTN2A1	8812.5	6842	6698.5	7922	7964	9142	7736.25	8695.25	8715	7871	8818	9159.5	7399.5	9031	8951.25
BTN2A2	8625	5902.5	6871.75	7669	6725.5	5557	4715.75	4904.25	5199	6342	5171.5	5125.25	5065	5649.5	4031.75
BTN3A1	7243	7769.75	6738.5	9170.25	8293.5	7605.5	6498.5	5572.25	7235	7109	5851.5	7691.75	5353	7864	6504.5
BTN3A2	8342	8024.75	5320.75	9130.5	5838.5	8654	8428	7870.25	7636	8373	6496.5	9803.25	6073	7758	7807.25
BTN3A3	4072	6378.75	2382.5	6370.5	6772	6427.5	5480.75	5611.25	5847	5581	2642.5	7514.75	4611	7142.5	5001.25
BTNL9	2197	7878.75	6478.5	4155.75	3366.5	1722	358	115.5	1982	2217	1635.5	281.75	672	238.5	115.5
BTRC	7118	6167	5079.25	5630.25	6496.5	3413	4800.5	4377	4248	6565	4793.5	3822.5	4450.5	3877	4830.75
BUB1	10839	1762	2242.25	3361.75	3199.5	6738	7545.5	7108.5	4583	9270	8204.5	5719.75	8128.5	6511.5	8021.25
BUB1B	7797	3078.5	2872.5	5091	5219	3757.5	4327.5	4029.75	3212	4617	4355.5	2632.5	3983	3678	5751.25
BUB3	11620	10703.5	10321.5	10618.5	10634	11116.8	10872.5	11099.2	10604	10944	10963.5	11069.5	10871.5	11007.5	11335.5
BUD13	5739	6492	6252.5	6018.25	6514.5	5666	5890.5	6677.25	6275	6229	6247	6161.5	5903.5	6409.5	6420.5
BUD31	8696	9068.75	7940	9977.25	10704	10751.5	11203	11336	11028	8867	11155.5	11167.8	11106	11252	11202.8
BVES	8805	2790.5	2823	2198.75	2181	4507.75	3951.25	4151.5	3647	9051	4500	3305.25	6288.5	3927	4611.75
BYSL	5631	2534.5	2225	4080	5237.75	8761.75	8194.75	8457.75	8478	4256	9815.5	7830.75	9022.5	7777	9083.25
BZRAP1	2417	2224	2837.5	2412.5	2529.5	2794.5	1575.75	979	2650	2291	580	1035.5	586	1291	972.75
BZW1	11353	10660	10540	11200	11049.5	9585.5	9530	10091.8	8966.5	10933	10369	9417.5	8582.5	9844.5	10068.2
BZW2	10630	10795	11126	10759	11378	10562.5	10720.8	11123	9629	9552	11436.5	11100	10939.5	10532	11018.8
C10orf10	2177	8294	7783.75	6023	5728.5	7689	7352.5	7323.5	9408	1967	5534.5	8059.75	6652.5	10097.5	7438
C10orf11	5301	3493	5619.75	4687.25	4215.5	6509.5	7453	6891.75	7631	5046	8614	8063.5	9245	7790	7929.25
C10orf12	3930	3442.5	4273.5	3730.5	6836.5	2231.5	2966	2870.5	2523	3657	3248.5	3046.5	2875	3142	3000.25
C10orf2	5771	1472.25	2758	1815.5	4604	5380.25	5279.75	6679.75	5030	3661	7972	4742.25	6701	5492	7096.5
C10orf32	5612	9860.75	9891.75	9457.75	7324	6598.5	6561.5	6987	5654	3489	6208	6952.25	6498	6294.5	7555.5
C10orf35	3764	1465.75	1902.5	1341.75	3382.5	5540.25	6239.5	4576.5	5129	4027	6606	4885.25	4930.5	6530	7415.5
C10orf53	1839	928	1499.75	1191	310	430.5	716.5	931.75	1214	1522	505.5	343.5	776.5	585	995.5
C10orf54	2865	6646	7059	7661.25	4827	5535.25	5267.25	4464.75	4673	2653	3698	5046.75	3905.5	6092.5	2891
C10orf62	1949	793.25	2165.75	863.5	758.5	561.75	563.25	203	254	2426	6.5	428.25	776.5	273	516
C10orf67	706	2925.75	3945.25	2766	1653	1346.5	1864.25	2245	1023	706	1448.5	1079.25	3146.5	1520	991.5
C10orf71	1570	1598.25	721.5	1177	986	230.5	1339.5	1307.5	544	1568	1022	934.25	1217	921	1405.5
C10orf76	6909	5604.5	4175.25	4869.5	7430	6277.5	6502.25	6770.75	6398	6344	5872.5	6694.25	6498	6325.5	5676.5
C10orf88	8334	3417	4518.75	3290.75	6758.5	4364.25	4824.75	4542.25	4093.5	7281	4952	4839.75	4498	4256.5	5152.5
C10orf90	9932	1444	2150.5	3652.75	3542.5	4471	5648	5528	4728	10350	6515.5	6657.25	6879	5412.5	5754
C11orf1	1886	7689	7035	6902.25	8552.5	8702.75	9012	9753.25	8895	1934	9404	9454.5	9164	9880.5	10187.5
C11orf24	10148	7426.5	8627.75	7838.25	9874	8103	6597.5	6535	8318	9563.5	5142.5	6468.5	6701	6850.5	5918.25
C11orf30	6986	4116.25	3467	4598.5	4829	2346	1951	1812.25	2862	6957	1320.5	1375	1846.5	1796	2147.5
C11orf31	7515	11038.5	11203	11066	11034.5	4116.5	4112.25	3293.25	4216	7918	3323	4392.25	2422	2961	3762.5
C11orf45	1483	3432.5	2482.75	2122	2025.25	1633	850	494.5	1369	1676	2414	1004.5	438	1497.5	726
C11orf49	5871	7137.5	7397.5	6736	6885.5	4734	4466.5	5618.25	3911	6578	3866.5	5019.5	3461.5	3979	4660.75
C11orf54	8332	8128	7866	8430.25	7457.5	6362.5	6094	6827.5	8385	7780	6418	5983	5399	5454.5	6847
C11orf57	7388	6677.5	6598.5	5978	8576	5423	6510.25	7058.75	5239	5550	7577	6813	6595.5	6276	7303.25
C11orf58	11781	11009.5	11017	11303.5	9422.5	3575.5	7726.5	7545.75	3554	11763	7032.5	8150.25	6632	7050.5	7700.25
C11orf63	2149	2796.25	2908.75	2176.25	2024	7431.5	6473.25	6708.75	9876	2005	6629	7379	7233	7274.5	8022
C11orf68	6038	6402.5	6706.5	5766.5	5853	5986.5	6476.5	6767	6256	7061	5534.5	6722	6578	7777	6106
C11orf70	43	2410.25	1157.25	1541.5	1478	1967	1502	2172	1181	57	1270	1885.75	1971	2135.5	2424.5
C11orf73	5193	9263.75	9266.25	9792.25	8806	7005.5	7333.5	8208.5	6331	5561	7417	7281.75	6766.5	7509.5	7748.75
C11orf74	4885	5467	5223	3552	4603.5	7372.5	7994.25	9663.75	8272	6114	8958	8843.5	8298	8974.5	9095.25
C11orf80	5707	9618.5	7379.25	5954.5	3891	6496.5	5508.25	5661	6451	3993	2604.5	3591.75	5541.5	6021	5062.75
C12orf10	7035	6871	8044.5	6333.75	5088.5	10283.5	9946.5	10696.2	9917	8117	10824.5	10092.5	9878	10000.5	10424.2
C12orf29	7783	9923	9433	9576	7515	6464	7058.25	7159	7430	6329	7437	6878.75	7275	6294.5	7591
C12orf4	8008	5794	5501.5	6497	7608	5600.5	6454.5	6145	4513	7299	7307	5626.25	6206	6066	6638.75
C12orf42	1080	1011.75	1781	1636.75	413.5	101	131.75	94.75	179	1223	438	131.75	38	51	256.75
C12orf43	6616	4840	3900	4104	5311.5	6592	6084.75	6457.75	6212	6626	5686	5695	5697.5	5431.5	6237.5
C12orf49	9698	7931	7470.75	8474.5	7472	5779.5	6321.5	5096	4517	10186.5	3747.5	4894.25	6008	4148.5	4009
C12orf5	7570	4455.5	4503.5	7696.25	7688	6438.5	8014.75	6740.5	4762	8059	6977.5	6953.75	8162	5852.5	6644.75
C12orf57	7944	11406.5	11650	11390.5	8787	11205	11280.8	11253.8	11089	9850	11626.5	11155.8	11595	11056.5	11427.8
C12orf60	1303	1766.75	2139	820.5	1626.5	2186	3008	2494.5	2378	1002	2222	2140	3883.5	2143	3578
C12orf65	3166	4471.25	4940.5	4201	3452	5543.5	6070.75	6597.75	6022	2154	5806	6514.75	5741	6530	6555.75
C12orf66	4925	7132.5	7426.25	5841.5	4997.5	4133.5	4265.75	3989.5	4981	3620	6047.5	4893	3754	4994.5	4311.5
C12orf75	5559	7057.25	5610.5	6981.75	5776	6415	6899.25	6475.75	4245	6297	3570	6356.75	6879	6907.5	5798.25
C12orf76	6613	4183.5	5179	4508.5	5621	7429.5	7381.5	7362.5	7113	7346	8729.5	8138.75	8754.5	6423.5	8072
C14orf132	1520	9083	7708.25	5141.5	5427.5	4635.5	3273	4298.75	6147.5	3929	7915.5	3246.5	8371.5	2803.5	5233.5
C14orf142	6293	6116	4072.75	6411	3053.5	6811.25	8591.25	8637.5	6812	4362	7876	8256.25	8636.5	9037.5	8417.75
C14orf159	2717	7651.75	7128.25	6911	7280.5	8541	8299.25	6890.5	8089	2974	6436	8038	7150.5	8185	7720.25
C14orf166	10775	11474	11481.2	11504.5	11034.5	10223.5	10669	10982.8	10547	10120	10772	11009.5	10439.5	10656.5	11025.5
C14orf169	5089	4823.25	6587.25	5520	9555	7357	7543.5	7190.75	7138	5318	7227	7682.5	7506.5	7078	8155.75
C14orf2	7599	11520.5	11514	11603.2	11726.5	8948.5	9122.25	9479.25	8935	7585	10281.5	9298.25	9022.5	9313	9274.75
C14orf37	2191	1227	1391	1055.5	1270	2496	1751.75	3110.25	1776	1184	1077	3242	586	2265	2211.5
C14orf79	2261	1236	1287	1272	3464.5	5237.75	4797	5344.25	5793	2172	4977	5400	5781.5	5748.5	5901.5
C14orf80	5429	564	1549	424.5	3398.5	6474	5335.5	5912.5	5828	6100	4816.5	4670.5	5541.5	6132.5	6839
C14orf93	4561	3179.25	2675.25	1898.5	3646	7585	7444	7566.25	7254	5039	7519.5	7947.5	7744.5	6183.5	7971
C15orf27	1838	3227	2803.25	2529.25	1540.5	1145	1633	723.25	746	1838	2083	995.5	737.5	1431	1243.25
C15orf39	5363	3447.75	4629.25	4024.5	2862	6662.5	7362.25	6612	6018	5900	7608.5	6585.25	7688	6901.5	7066.5
C15orf40	3370	6056	6284.75	5480.75	4588.5	5196.75	4327.5	4385	5042	2953	4630.5	4949.25	3983	4022.5	5444.75
C15orf41	7334	4074.75	4026	3497	5833.75	4577.5	4188	4617.5	2677	7301	5889.5	3314	4587.5	4492.5	4781
C15orf48	121	9716.5	6080.75	10871	5661.5	6197	5990.75	5923.5	4195	135	2987	4124	6959	6745	4361.75
C15orf52	5025	5332	4895.5	5776.25	6086.5	9210	6572.75	8528.75	8802	6221.5	5661	8608.5	9457.5	9425.5	10039
C15orf57	5021	3736.75	5036.75	4674.5	3489.5	9759	9865	9506	8699	4875	9116	9238.5	10422	9658	9127
C16orf13	5630	5931.5	7159.25	6139.5	7330.5	8083.5	8454.75	9407.75	8883	5855	8818	8112.5	9008	9326.5	8797.5
C16orf45	3588	5329	5466.75	5073	4903.5	2866.5	2412.75	2467.5	3706	5186	2261	2790	2011.5	3902	2981.5
C16orf58	8131	4378	4731	4117	4185	10843	10599	10751.5	10878	8586	11015	10719.5	10939.5	10503.5	10775.5
C16orf59	4701.5	541.75	1120.5	465.25	2226.5	5880	6025	5908.75	5123	4716	6247	3935	6441.5	4536.5	7177.5
C16orf62	6962.5	6849.75	7941	7680.25	7277	4592.5	5040.5	4555.75	3839	9384	5201	5031	3955.5	3978.5	3002
C16orf70	6156	7389.5	6346.5	5887	7524	4939.5	4450	4390	4585.5	7219	4977	3696.5	3780	3466.5	4527.25
C16orf72	9123	9732	9778.25	9627.5	9182.5	7624.75	8005	7915.25	8240	9402	8007	7504	8222	7440.5	7667.25
C16orf74	5068	351.5	1127.25	971.25	2593	1963.5	3322	1347	1382	4892	6163.5	485	1351.5	662	3179.75
C16orf82	2673	1090	785.75	910	445.5	423.5	125.75	201	763	2606	22.5	71.5	64	487.5	45.75
C16orf87	4256	3423.5	4360.25	3996.5	3238	5195.5	5994	5471.25	4924	4027	6455.5	4969.5	5422	5019.5	5885
C17orf53	5002	846.5	3134.25	2064	1916	6384	4954.25	6099.5	4775.5	5333	6629	4458.5	5109.5	5376.5	6901.25
C17orf58	3328	7626.5	7447	8173	8959.5	9702	10169	9788	9457	3165	10042	10341.2	10622.5	9685	10415.5
C17orf59	3261	660.25	2136	1342.75	2936.5	3775.5	4374.25	3317.75	3604	3366	3399	3740.75	3279.5	3871.5	3553.25
C17orf62	7453	5859.5	5281.5	7186.75	7548.5	8724.25	8191	8094	7979	8233	7519.5	8470	8685	9220.5	7947.25
C17orf70	5233	3754.5	2837.75	3479.75	3308	10299.5	9128	9588.75	9954	6252	9801	9633.5	9878	9341.5	9227.25
C17orf75	7369	2256.5	3361.75	2238	5457.5	3063.5	1953.75	2506.5	3149	6847	397.5	1933	672	516	1559
C17orf80	6549	6157.75	5735.5	6031.5	5943	4308.5	4369.75	5293.5	2578	5179	5513.5	5055.5	4354	4859	5387.25
C17orf82	2304	2712	4918.5	2506.5	1536	2697.25	2857.25	3026	1631	2735	3183.5	3064.25	1887	4325	3810.75
C17orf85	5637	7080.25	5045	5204.5	8441	5694.5	5754.5	5553	6525	6328	6862.5	5767.75	6145	6276	5113.5
C17orf97	2215	4284	1731.25	4135	4017.5	6411.5	5181.75	5489.75	6257	3270	8513.5	5908	5293	5130	6594
C17orf99	4367	270.25	565	747.25	749	1495	2744.75	2349.5	1577	4581	2485.5	2278.5	1748	2221.5	2398.75
C18orf21	4177	7267.5	7371.5	7942.25	8552.5	6905	7447	8279.25	7785	3569	7519.5	7820.5	7296	8151	8785.75
C18orf25	7104	8714	9430.5	9225.25	9179.5	9067.5	8752.75	9092	8906	6415	8864	9437.75	8754.5	8872	9645.5
C18orf8	7664	5208.25	4426.5	5530.75	6688.5	8456	7534.5	8420.25	8077	8285	6093.5	7925.75	7399.5	8285.5	7906.75
C19orf12	7571	6735.75	6052.75	8034	10040.5	9829	9783.25	9778.75	10205	7251	10552.5	9714	10474	10442.5	10091.8
C19orf18	244	1945	3420.5	1641.25	2337	936.5	717.5	488	1734	202	1270	655	1351.5	969.5	1213.25
C19orf24	6888	2824.5	4708.75	5060.25	5146	7857	8694.25	8252.75	7691	7802	7541	8862	9098.5	9205	8104.5
C19orf25	5449.5	3684.5	4366	4187.5	2727.5	5512.5	5745.5	5059.5	5343.5	6024	3994	4438.75	5803	5174.5	5637.25
C19orf33	4876	10455.5	10279.8	10183	8778.5	449.5	541	246.5	521	5479	314	657.75	173.5	1291	390.75
C19orf40	6446	2752.75	3460.75	3114.25	2452.5	4077	4294	4339.25	2334	4204	5201	3505.75	5497	4689	4182
C19orf43	10892.5	10955.5	11080	10945.8	11105.5	10526.2	10605.5	10562.5	10168	11045	10089.5	10448.8	10374.5	10587.5	10533
C19orf44	3216.5	1329.25	1042	1241.75	5279.5	4333.5	3960	3755.5	4640	3025	2841.5	3750.25	4475	3320.5	4208.75
C19orf47	4872	1127.75	2666.25	2061.25	2121.5	3027.75	3606.75	2859.5	2757	5077	3112.5	2227.5	3955.5	3433	2378.5
C19orf52	5278	3043.5	2142.25	2386.75	3972.5	7560	6083.75	6909.25	6091	4970	5635	7148.25	6701	6369	6470.25
C19orf53	8200	10055.8	10620.8	10743	10739	10815	11039	10924.8	10756	9381	10631.5	10884.2	11063.5	10758	10824.5
C19orf54	4185	4082.25	4106.5	3857.75	8225.5	5841.5	5638.5	5328.75	4700	4398	6208	5491	6398	5317	5367.75
C19orf57	3289	392.25	771.75	448.25	2237.5	2201.25	3259.5	2117.5	1711	3301	2782.5	1762.75	1602.5	1828.5	2075.5
C19orf66	6806	5820	6808.5	6913	8817	7906	7189.5	7084.75	7206	7335	3514.5	7979	7336	9157.5	7405.5
C19orf70	5770	9187.25	10118.8	10435.8	6342	10550	10760.8	11127	10903	5967	10598.5	11009	10742.5	11131.5	10770.8
C19orf73	3511	675.75	1349.25	1519	1079.5	1861	2711	2308	1598	3258	1219	2011	2812	2923	704.5
C1GALT1	6774	3550.25	3546.75	4210	4391	5039.5	6775	5717.25	4567	6375	5707.5	6776.5	5843.5	7387	5871
C1GALT1C1	4838	7499	7269.75	8591.75	6733.5	6219.5	8916.25	9316.5	5788	3583	7876	9273.75	8598.5	8876.5	9123
C1orf101	633	1189.75	1684	2243.75	1484	1617	3875	2185.75	1352	555	729	2929.5	7254	1818	2412.75
C1orf106	3154	10025	8809	8340.5	8025	2951	1403	4047.25	2041	3372	4587.5	1133.25	1174	1923.5	1428
C1orf109	4116	4509.5	3846.75	3867.25	3092.5	6375.5	5611.5	6470.25	5215	3213	7742.5	6057.25	5843.5	6021	5749.5
C1orf115	3274	7938.25	7170.5	4003	4150.5	4995	4070.25	4282	8703.5	2778	5909.5	3645.25	3279.5	2803.5	4935.25
C1orf116	2326	8978	7141	7385.5	7631.5	2786.75	1702.75	1579.75	2358	2270	2330	1616.75	2812	1140.5	2302.5
C1orf131	3931	7495.25	6946.75	8066.5	6100	7910	7931.25	8417	8573	2686	9871.5	7972.75	7783	6914	9270
C1orf159	4480	1849.75	1721.25	2056	2291.5	4566.25	4415	3506.5	4079	4637	4020.5	3393.5	3983	4236.5	4046.5
C1orf162	2024	3632.5	2378	5990.75	6582	9639.75	10308.5	9818.5	9903	2024	8864	10643.2	9294.5	10763.5	8411.5
C1orf198	8452	10172	10693.2	9248.5	8974.5	8861.5	8432.5	8706.25	7338	8921	10262	7947.5	7875	8892	8863.5
C1orf21	9582	9914	9652.75	9653.5	9000	5769.25	6185.25	6244.5	6123	8642	7075	6668.5	6834	3794.5	7519
C1orf210	2080	2582	1034	2266.5	1054.5	1574	1871.5	1457.25	987	2022	2812	1950.25	1700.5	2207	1181.5
C1orf216	4769.5	5022	5401.5	6058.5	6578.5	6650	7243.5	7036.75	5485	5481	6270.5	7006.75	8499	8222	5775.5
C1orf228	2578	931.25	2203.25	1429	2704	2813	3111.25	2762.5	2807	2842	1726	2600.5	3625	3258	2498.25
C1orf35	5850	5616.75	6622.5	5242.5	4039.5	7019	6714.75	6373	7103	6488	6782	6355	6613.5	6024	6574.5
C1orf43	11293	11453.5	11452	11497	11242	10557.5	10903	10957.5	10560	11352	11057	11097.5	10978.5	11078	10896.5
C1orf50	4293	2924.75	4445.75	3288.75	4926	9004.75	8959.5	9130	9391	3902	8576.5	8935	9991.5	9413	7976.5
C1orf52	4912	9502.75	9924.75	9504.25	10147	8722.5	8286.5	8313.5	8222	4511	9418	7986.75	8993	8010.5	8775.25
C1orf54	1602	7625.25	6225	7940.5	7271	9637.25	9451	8885.75	8462	1583	9613.5	9828.75	8925	9871.5	9092.5
C1orf56	4856	3055	3209.5	2544.5	2933.5	3721.75	3595.25	3865.75	2090	5585	3600.5	3685.5	4078	2888.5	3394.75
C1orf61	293	2512.75	3837.5	2011.75	920.75	539.5	973.25	1067.75	722	387	1543.5	1201.5	1126.5	1054.5	1689.25
C1orf64	2286	600	1316.5	638.25	935	984.75	1458.5	1246.25	671	2195	1497	1104.75	1174	427.5	1568.5
C1orf74	3736	3705	2571.25	2754.25	3657.5	5090.5	4418.75	6334.5	5337	3298	5909.5	5394.75	4768	5034.5	5985
C1orf86	4636	4689.5	5520.75	6706	3698.5	9287.5	9501.25	9629	9014	4994	10140.5	8572.75	9862.5	10264.5	9977
C1QA	1850	6347.75	3867.5	9774.75	3751.5	8313.5	7930.75	7330.75	7869	1929	7157	9569.5	6922.5	9598.5	5794.75
C1QB	1569	4964	1469.75	8412.75	4440.5	11354	11312.8	11050	11376	1535	10802	11628.8	11283	11633.5	10243.8
C1QBP	11559	9915.25	9610.75	10685.8	10238	11043.5	10590.5	11063.5	10630	11419	11495.5	10845	10751.5	10119.5	11261.8
C1QC	1967	7677.25	4979.25	10406	5865	11112.5	10898.8	10583	11042	2252	10598.5	11500.8	10537	11517.5	9882.25
C1QL1	6042	875.75	2303	1890.5	1172.5	2509.5	3596.25	3781.25	2162	6939	1497	3438	2192.5	3392	2401
C1QTNF1	4725	4953.25	5271.25	3672.25	3199.75	8585.5	7855.75	8965.25	10250	7350	4355.5	9800	7210	11224.5	7384
C1QTNF3	1571	7819.25	6362	3788.25	4710.5	1536	1914.25	1625.75	998	1922	1879.5	1255.5	1217	549.5	1787.25
C1QTNF4	4203.5	593.75	1367.25	1275.75	877.5	2615.5	3392.75	2362	803	4514	7987.5	1684.75	1931	3601.5	2046.75
C1QTNF6	4288	1197.5	409.75	1959.5	2842.5	6729.75	7923	7014.25	6204	4885	7329	6080.75	7611.5	5466	7426.75
C1R	4533	10898.5	9673.5	11041.5	8988	6852.5	6563.75	7500.25	8745	6443	3399	7754.75	4999	7316	5881.25
C1RL	3870	7213.75	4594.75	6534.75	5332	5688.5	5140	4634.5	8236	4255	5806	4148	4974.5	5627	5061.75
C1S	1709	11466	10921.5	11619.5	10062	9429.5	9468.75	8616.75	11321	4036	8614	9488.75	10039	10196.5	7274.75
C2	1965	3778.25	4051.25	6236.25	4826	7753.25	7227.75	5379.5	9005	2156	6733	8492.5	8598.5	8892	5835.75
C20orf196	4162	1651.25	1335.25	2744.75	3393.5	4824.5	4785	4188.5	4073	4166	4587.5	3892.75	5089	4277.5	3488.25
C20orf27	4721	3628.5	3877	4164.5	3522.5	9177.5	8861.25	9529.25	8850	5011	10225	8769.5	8806.5	8974.5	8987.25
C20orf96	2113	362.75	558.25	90.5	2421.5	1970.5	2899	2220.75	1674	2624	3183.5	2109.25	2847	2920.5	2163
C21orf2	4161	3268.25	4053.5	2049	5199.5	7217	6425.5	6002	7359	4253	6247	6452.25	8408	5578.5	5841.5
C21orf33	7850	10186.8	10302.2	9785.25	10254	10756.5	10570.8	10824.2	11284	6702	10713.5	10676.8	10639.5	10720	10908.8
C21orf58	4092	1119	1231.25	996.75	2331	4877.5	10275.8	10352.2	3535	3968	10212	10911.8	10916.5	10897.5	11232
C21orf59	9007	7359.75	7611	8066.75	8017.75	8664	9167	9476.75	8637	9010	9134	8879.75	9098.5	9499.5	8817.5
C21orf62	1152	614	1554	1319.5	498.5	988	565.5	556.25	1087	1020	291	97.75	672	90.5	563.75
C21orf91	10996	10862.5	10080.2	10729.5	7403.5	4141.5	5583	5691	2868	10630	3514.5	2975.25	6187	4105.5	3710.75
C22orf23	1397	620.75	999.75	417.5	733	3499.5	1932	1854.5	4884	1541	771.5	597.25	1432	1435	2083.75
C22orf31	132	1898.25	3781	2522.25	1486.5	309.25	128.5	243.25	155	117	505.5	112.5	121.5	749	323
C22orf39	5345	6684.75	7636.75	6377	5101.75	5008.5	4821	5379.75	3820	5333	4174.5	5159.25	4541	3871.5	5097.25
C22orf46	3529	2409	1066	1186.75	2652	5533.5	6676	6473.5	6424	3228	6418	6005.5	8096	6850.5	7814.5
C2CD2	4621	8904.75	7371	8446.75	8006.5	7682	6348	7277.5	8281	6670	8340.5	7011.75	5803	6467	6759.25
C2CD2L	3556	3822.5	3384.25	3455.75	5298.5	2982.5	2004.25	2276.5	2497	4081	1022	2923.25	1700.5	2567.5	1991.5
C2CD4B	777	1017.25	2479.5	1210.25	2905.5	2070	1815.25	2115	2266	775	1826	2992.25	1432	3052	1879
C2orf15	190	40.5	751.25	418.5	720.5	1386.5	1618.75	2034.5	1198	141	1367	1744.25	2609	1002.5	2233.5
C2orf27A	5395	2043.5	3906.75	3202.75	2214.5	1629.5	1809.25	1487.75	833	7002	337	1217.5	1800.5	1100.5	2551.25
C2orf40	251	5514	6276.5	3704.5	3158.5	789.5	866.75	704.75	1528	262	729	853.5	826	324.5	467.25
C2orf42	6125	4624.5	3708.25	4698.75	5744.25	7602.25	6861.5	6971.75	8580	5456	7592	7297.75	6959	8031	7674.75
C2orf43	7364	4227.25	3910.5	4254	4052.5	5508	5147.5	4996	5189.5	6702	7285	5579	5803	4713.5	5747.25
C2orf44	6128	2686.25	3885.25	2969	6015.5	6779	7245	8447.75	8114.5	5014	9951.5	7513	8279.5	8412.5	8408
C2orf47	6892	7908	6972.5	8508	8341.5	8730.5	8109.25	9554.5	8770	5522	9977.5	8772.75	7950	8499	9303
C2orf49	8492	7084.75	7640.25	6340.25	8511.25	6307	7340.5	6763.5	6060	8855	5635	6479.75	7875	7335.5	7252.75
C2orf69	7779	10010.2	10653.5	10733	9387	2275	11180	11277.5	1712	6382	11297	11343.8	11425	11388.5	11588.8
C2orf73	331	186.75	1777	757.5	1199.5	118.5	620.75	1052.25	263	326	962	710.5	322.5	414.5	907.75
C2orf82	5812	1331.25	829.75	486.75	1999.5	3179.5	2752	1951.75	6968	6001	3294.5	2836.25	2268.5	1866.5	3325
C2orf88	3997	4033	6965.5	3485.75	3215	6436	5203.75	6790.25	6098	2567	8576.5	3934.25	4930.5	6360	4991.75
C3	1360	11311	10405.5	11172.5	10598.2	4699	4011	3329.75	9719	1530	2746.5	3756.5	4007.5	4710	2870
C3AR1	2339	4875.5	624.75	5168.75	4486	4873	5140.75	3825.25	4863	1387	2455	4623.25	4745	5317	3158.75
C3orf14	6439	7863.25	8316.5	9283.5	7295	9033	9265.25	10690.8	7572	4904	8419	10078.8	10925.5	9772.5	10158
C3orf17	9911	9607.75	10327.2	9757.75	10534.5	7752.5	5244.75	4763.25	7924	9256.5	5387.5	5082.25	6053.5	3584.5	5101.25
C3orf18	3555	2202	3304.5	2679.5	2298.5	3122	4394	3270.25	3805	4056	656	2720.75	2229.5	4172	2883.5
C3orf33	3099.5	1053	1590.25	882.25	2116	1605.5	2305	2114	1288	1951	3514.5	1066.75	1558	1843	2738
C3orf36	1193	371.25	1114.5	586.5	250.5	2021	2040.5	2482.5	2179	1344	2023.5	2176.5	3023	2165	2231
C3orf38	7586	5390	4924.75	5776.75	6495	6402	6029	6094.25	3771	8789	5002	6912.25	5611	5344.5	6092.75
C3orf52	6886	5773.25	4852	4749.5	3594	2969.5	2041.25	3272.5	939	3774	1125.5	2380.25	3549.5	3718	2846.5
C3orf58	8261	10765.8	9893.5	10403	7932.5	5194.5	5230.5	4760	3937	6470	4355.5	5015.25	4267	5245.5	5161
C3orf62	3345	1454.5	1328.5	1051.5	209	3320	3587	2763	3261	3421	3216.5	3044.75	2875	3104	3953
C3orf67	3893	914.5	1009	859	1416.5	2136.75	1372	2262.75	2182	2918	1826	2355.75	2468	2713.5	2249.25
C4BPB	304	707	372.25	321.25	628	703	527	881.25	10521	358	962	1096	322.5	1228	2138
C4orf19	768	1718.75	5077	1180.5	1929	3412	3178.5	2558.75	5166	845	5171.5	4909	5198.5	2207	4644.25
C4orf27	2475	9847.5	9909	9683	7927.5	6655	6766.25	7612.25	6757	2534	6515.5	7331.25	6145	6622.5	7520
C4orf29	4680	5659.25	6068.25	5629.5	6875	4521.5	3651.75	3374.5	5163	4151	2369	3940.75	3549.5	4350.5	3351.5
C4orf3	10482	11528.5	11430	11421.5	10246	8720	9652.25	8677.75	10436	11108.5	7171.5	10314.5	10288	9546	9026.5
C4orf32	2894	9838.5	8857.5	8218.75	5385.5	3581.5	4427	4195.75	3163	3754	3953	4732.25	3412.5	5115	4181
C4orf33	3983	4621.25	2761.5	5021.25	3398.5	4487.5	5123.75	5725.5	6053	3622	4500	6483	4841	6070.5	4183
C5	1163	3610.75	4488	2288.75	3559.5	4538	4350.25	5468.25	11426	1136	4078	5316	4246	4710	5261
C5AR1	1504	3155.25	1413.75	3186	3436	4123.5	4366.25	4190.75	4187	1479	3542.5	4847.25	3176	5397	3994.75
C5orf15	9733	10259	10794	10436.5	11153	10913.8	10910.2	10848	11069	9320	11214.5	10810.8	10788	10830	11075.8
C5orf22	10023	7364.5	7734.5	8046.5	7978	4020	4986.25	5644.5	2787	9002	4321	5900.25	5065	4897.5	5228.75
C5orf24	10675	10666.5	10807	10853	10375	4470	4867.75	4079.75	2926	10910	4478.5	4721.25	3518.5	3085.5	4914.25
C5orf28	7266	5855.5	5009	6902.25	7318	11461.5	10513.2	10881.8	11711	6361	10939	10981.8	10945.5	10932.5	11427
C5orf30	7111	4642	7391.75	5578	7927	5209.25	5883	6813.75	4186	5985	7501	5748	6264.5	5130	6521
C5orf34	6843	2458.5	1677.5	2814.75	2389	3830	3829.5	4889.5	2373	4347	3454	4075.25	3176	4148.5	4911.75
C5orf42	5204	1289.25	843.75	356	1418	2147	2126.5	1926.5	1615	4969	1077	3203.5	475.5	2713.5	2153.25
C5orf45	4862	4499.25	5776.25	3703.5	5668	3771.5	2012	1963.5	3563	5058	2674.5	1906.25	1174	2054.5	2517.75
C5orf46	872	10649.2	9497.75	10551	6712.5	1161	3003.25	1549.25	2253	832	397.5	2216.25	2737.5	5083.5	2336.5
C5orf51	10406	7787.25	7704.5	8090.5	9540	8872	8602.75	9558.25	7608	10779	8183.5	9733	7765	8976	9254
C6	189	2823.5	1698	873.5	415.75	1288.5	1484	1962	11303	174	2414	2458	406	1526	1344
C6orf1	6797	5316.5	4855	5477.75	6703.5	6386	6632	6936.75	5662	6600	6803	8061	6419.5	7737.5	6798
C6orf106	9062.5	5074.25	5287.75	5653.25	11579.5	6665	7566.75	6340.25	8150	9137	7955.5	7129	6879	6993.5	7148.5
C6orf136	4641	6066.75	5610.75	4889.75	8154.5	8297.25	8102	8491.75	8618.5	4540	8729.5	8745	8008.5	8861.5	8913
C6orf203	5553	6033	7087.75	6578.5	7462	3055	5120.75	5515.25	4444	3755	5224.5	5133.75	5198.5	5318.5	5549.5
C6orf47	5203	3324.25	3618.75	3236	7611.5	7726.5	8377	7631	7904	5203	8377.5	8854.25	8355	8253	8494.25
C6orf48	10148	11094	11521	11176.5	11286.5	11506.5	11474.5	11677	11420	9414	11664.5	11632.2	11569	11475	11650.2
C6orf62	11515	10510.5	10485.5	10831.8	11545.5	10453.2	10401.2	10147.8	9463	11113	10454	10706	9623	10222.5	10612
C6orf89	10249	7732.75	7205.75	6752.25	8367.5	6098	5352.5	5204.25	4608	10550	5753.5	6011.25	4225	5633.5	5684.5
C7	389	6233.25	5681.5	4167.75	3027.5	4913	1435.75	6115.5	9403	340	771.5	8802.5	438	3741	1344
C7orf13	5121	1271.5	2521.75	1382	2403	4123.5	4199.25	4385	2848	3752	6936	2819	5176.5	3698.5	4706
C7orf26	7504	6164.5	6105.75	6497.25	6187.5	9001.25	8969.75	8313.5	9271	8806	9271	8858.25	9312	8516	8772.25
C7orf33	399	189.5	137.5	342.75	323.5	330	249	44.25	209	491	40.5	276.5	438	324.5	201.25
C7orf43	6156	3901.5	3581.75	3651.5	3602	6335	5133	4976.75	5731	6483	5002	5233	5565	5297	5946.25
C7orf49	10389.5	5572.25	7039.25	5918.75	6710.5	7907	7601	7203.75	7517	9422	8007	7139.25	7356	6864	7860.5
C7orf50	8378	4076.5	4182	4174	4766	11163	11140.5	11243.2	11290	8904	11481.5	11103	10909	11092	11145
C7orf55	7165	6143.75	7370.5	7843	9006.5	7951	11002.2	10795.5	8969	5496	10999	10858.5	11288	10606.5	11101.2
C7orf60	8755	7095.25	7514.5	7773.75	6257.5	335.5	166.75	84	304	8094	14	104.25	15.5	170.5	83.5
C7orf61	2963	2308.5	2710.75	1719.25	1633.5	1458.5	572.75	1429	383	3189	3294.5	758.5	475.5	1721	1533.5
C8G	4044	572	1226.25	936.5	313.5	2142	2254.25	1326.75	9674	4138	1772.5	1920.75	2967	1769.5	2573.5
C8orf31	1290	610	2107.5	1743.75	112.5	1127.5	1192	953.75	1004	1487	337	707.5	998	1658.5	1188
C8orf33	9825	6721.5	6539.75	5670	5444	9968	9576.25	9972.25	9637	10238	11305	9955.75	10302	10005	10302.5
C8orf37	2226	2683.5	3997.5	3104	3019.5	11610.5	11565.5	11608.5	11735	2912	11617	11602.5	11642.5	11666.5	11720.8
C8orf4	1366	3629.25	3460.25	3746	4471	2941	1709.25	3201.25	3566	1087	1407.5	3492	1652.5	2538	1440
C8orf44	3484	2695.25	2934.5	1985	1749	2996.25	3257.75	2414.75	4655	2439	4587.5	2226.5	2344	2389	3279
C8orf46	6449	1301	908	614.25	2618	2769.25	4862.5	1737.5	2690	5354	2485.5	5240.25	3857.5	2898.5	4384.5
C8orf48	2353	2374.75	1511.75	1313.5	2812	4042	5133.5	6375	4630	1899	7114	6219.5	5154	4917	6322.5
C8orf58	5319	3838.75	3387.75	3105	4937	4815.5	4329	3768.75	3951	5360	3248.5	4348.5	3023	4613.5	4331
C8orf59	10706	10742	11017	11000	11427.5	10350.5	10497	11015	9968	10317	11379.5	10772.2	10639.5	11270	11154
C9orf114	7381	3831.75	4144.5	3483.25	6455	8695.25	9780.75	8877.25	8929	6686	8496	8848.25	10244.5	7808	8571
C9orf116	3505	419.25	1197	793.5	1074	3415	2961.5	4303.75	2625	3057	3183.5	1925.25	2229.5	2994.5	4538.75
C9orf142	6769	4446	5061.75	3949.25	4255.5	9769	9858.25	10010.2	9937	6736	8358	9674.5	10193	9633	10062.2
C9orf156	3143	4381	4925.25	4150.25	5179	6522.5	6893.25	6838.5	7142	2650	6359	7155.5	8925	6770.5	7278.25
C9orf16	7480	9042	9667.75	10490.5	6214.5	5795.5	6707.25	6831.75	4896	7145	5002	5549.5	6351	5559.5	5538.5
C9orf24	1516	1649.25	358.5	1316.5	611.5	1398	1943.25	1636.25	1604	1559	1726	1685.5	1351.5	1629	2080.25
C9orf3	4237	9855	10622.8	9211.5	9110	3713.5	2756.75	3256.75	5190	4787	1772.5	2275.75	2572.5	2789	3701
C9orf40	5524	2930	3613.75	3855	2496	5101.5	5678.5	4850.5	3517	5245	3747.5	3506.75	6095	5777	5254.25
C9orf41	8357	6464	5415	5479.25	8564.5	1659	2285.5	1286	1040	6698	656	1128.5	2609	1274	1527
C9orf50	1722	233.25	102.25	244.25	1513.5	1778	1822.75	1808.5	1200	2001	291	2129.5	2100.5	2221.5	2631.75
C9orf64	6305	10552	10181.5	8498	8198	5389.5	6351	5496.75	5557	6905	6023.5	5551	6441.5	5412.5	6903.25
C9orf66	1175	901	401.75	267.5	1205	3715.5	2017	2419.5	3605	1310	2369	1727	776.5	2055	1710.75
C9orf72	2600	6802.25	6442.5	7233.5	5116.5	4215.5	4599.75	4616.25	4493	3218	4020.5	5213.5	5986.5	3978.5	4778
C9orf78	7865	7331.25	6150.25	6855.5	9453	10378	10455	10671.5	10553	6969	10518	10636	10603.5	10055.5	10647.5
C9orf84	8	367	1908.5	1561.25	1337.5	209.5	1049.75	1270.75	1033	13	1826	781	1257.5	1051	1407.75
C9orf85	6554	6388.75	6678.25	5279.25	6359	2694	5657.5	6138	3505	5223	3994	5713.5	5446	4405	6315.25
C9orf89	6847	5470.75	6196	5806.5	4517	7435.5	8322.25	7253	6533	6803	4377.5	6372	7932	7870	7203.25
C9orf9	4398	3696.75	4784.75	3902.25	3504	4598	3948.5	5809.5	3493	5360	4675	4135.5	5399	2209.5	4561
C9orf91	8188	3697	3997.25	4434.75	7198	7486.5	7898.25	7180.5	6807	9286	7815.5	7320	8890.5	7098.5	6363.5
CA11	3501	3967.25	3076	2569.75	2312.5	4573.5	4961.25	5513.75	2560	5079	6672.5	3882.75	4611	5268.5	5204.25
CA12	1728	11534.5	11086	10715.8	8363	4320	3856.5	2888.75	2206	2750	962	5542	4974.5	8764.5	5938
CA14	6320	2653	1994.5	769.5	2543	6352.5	6335.5	3433.5	7534	9151	10385.5	8040.25	7989	3951.5	7368.75
CA2	874	10255.5	6351.75	7399.5	5185.5	5596.5	4395.75	4393.75	5992	876	4544	4807.25	3857.5	5901	6349.75
CA4	2964	1059.5	1357.25	958.75	964.5	2754.5	3154.25	2893.5	2149	2870	4723	2425.75	2967	2245	2435
CA5A	358	340.75	435.5	550.75	184	163.5	345	144	7204	256	656	33.25	160.5	11.5	360
CA5B	7389	1499.75	4821.75	2109.5	2705	5837.5	8509.75	5847.75	4755	9824.5	2707.5	7754.25	9052	8151	4841
CA6	924	8898.5	5561.5	10030	3677.5	2023.5	1350.5	1344.75	2478	1016	1219	1214.5	1846.5	1497.5	3448.5
CA8	6561	571.75	1103.75	979.25	699	1228	3526	363	432	8353	2841.5	1773.25	8685	9443	1428.25
CA9	3032	2213.25	3992.25	2298.75	701.5	2334.75	2308.75	2435	1698	3281	2083	1840.5	2468	1477	2755.75
CAB39	10942	10602.8	10352.2	10870.8	10219.5	10462	10871	10711.2	10351	10985.5	11112.5	10934	10751.5	10686	10758.2
CAB39L	4843	6196	5628	5251.75	3260	4310.5	4983.75	5245	4221	4952	4500	4864.25	5565	5272.5	4601.25
CABIN1	7443	5544.5	5097	4347.25	5218	7251	8008	6717.75	6332	8548	6564.5	7266.75	7783	7056	7053.75
CABLES1	10753	6072.75	10208.2	6927	9118.5	9184	9745.5	9445.25	9971	11036	9183.5	9631.25	11004	7846	9590.5
CABP4	3491	2212.25	5022.25	843.25	1219.5	1497.5	1171	809	721	3415	1125.5	521.25	268.5	1345.5	2750.5
CABP7	2133	632.25	632.25	791	1407.5	1662	1846.75	1676.5	2206	2499	9845	2559.25	2192.5	1749.5	2173.75
CABYR	1664	1306	2332.5	1895	3138.5	3326	2691.25	2922.25	2692	2964	4212.5	2025.75	5020.5	3771	4866.5
CACHD1	6003	8107.25	8778.75	8857.75	9682	4332.5	3957.5	5523.25	2925	5809	5707.5	3594	5588.5	3202.5	4371.25
CACNA1A	2258	1492	5367	2834.25	3110.5	1049	1318.75	1505.75	1102	2307	363	1794.75	625	2462.5	1305.75
CACNA1B	2332	598.25	1234.75	826.25	734.5	4228	1239	1417	3841	2382	1022	1101.25	1217	1345.5	1590
CACNA1C	1816	1848.5	4008	2707.5	1401.5	2213	1751.25	1881.75	2733	1817	1367	2113.25	1478.5	2285.5	1482
CACNA1E	1317	939.25	3539.5	1694.25	676.5	990	1239	810.75	801	1292	1635.5	583.5	322.5	1390	827
CACNA1G	2065	524.5	1250.75	1038.25	2287.5	620.5	741.5	1002.25	1007	2124	867.5	417.25	173.5	680	577.25
CACNA1H	3475	345	2386.75	2395	1040	4110.5	3432	1479.75	6320	3357	7417	3376.75	4202	3771	3294.5
CACNA1I	2621	685.75	3137.5	1054	1303	1770.5	1739.25	1647	1048	2706	619.5	558.75	625	2576.5	1858.5
CACNA2D1	2744	8382.75	7002	5508.25	5273.5	662	446.25	783.25	1100	3555	2083	591.5	136	238.5	466.25
CACNA2D2	2100	2971	669.5	1540.75	2127.5	2502.5	2545.5	2251.75	2847	2134	1407.5	3259.5	2539	1601.5	2223.5
CACNA2D3	611	2004	699.25	2332	2372.5	1549.5	316.25	589.5	1959	663	69.5	198	7.5	541	52.5
CACNA2D4	2763	2732.75	300.75	794.25	2634.75	3193.5	3213.75	1757.75	2037	2706	3724	2075.5	2147	3877	1551.5
CACNB2	627	2596.5	1937.75	2859.5	5155.5	346	1089.5	866.25	1332	687	1022	752.5	1303.5	461.5	1689.5
CACNB3	4762	4294.5	2988.5	4771.75	6286.5	7012.5	6365.75	7568	6484	6025	7395.5	7209.5	5520	6997	7422.25
CACNB4	1343	3548.75	1334.75	2169.25	1160	314.5	1096.75	1862	1645	1180	3323	1863.25	1971	1616	1920
CACNG6	3650	4593.75	7151.25	5195.25	857.5	2128.5	2388	2450	2505	3939	3323	2143	2147	1629	1920
CACNG8	4935	1143	1024.5	1113.25	1890.5	532.5	1361.75	1129.5	966	4979	580	972	1257.5	639.5	898.75
CACYBP	8105	9541.25	9057	9997.5	9296.5	7613.5	8996.75	8787.25	6936	7595	9644.5	8039.25	7989	7564.5	8440.5
CAD	7541	4687	5106.75	5044	4888	7487.25	5975.25	6491	6592	7895	8560	6645	7445	6700.5	7402
CADM1	7395.5	8272.75	11249.8	9144	8951	7269.5	7529.25	4878	7456	8055	3454	6318.75	8258.5	9814.5	8806.5
CADM2	3020	2243.25	2008	1662	323.5	217.5	2279.75	2748	1969	2964	2523	2674	2508	2613	2689.75
CADM3	2435	2484	3819	1882.5	1752.75	1512.5	1038.5	1125.25	650	6503	1125.5	1810	1257.5	4672	1229.25
CADM4	5591	1939.5	2042.5	874	2303	4991.5	5008.25	5458	3335	5544	9518.5	4461.75	5471.5	5476	5468.75
CADPS	1031	2135.75	3012.25	3627.75	1887	2779	3252.75	3617.25	2476	1928	2642.5	4906.75	3412.5	2165	2612
CADPS2	3782	4680.5	7892.25	5680	7815	5060	7896.25	4769.5	6167	2563	7541	8592.5	8162	6989.5	5014
CALB2	1442	4137	3001.75	2729.25	1801	2656	3564	4338.25	3385	1498	5117	3637.5	5293	3771	3853.75
CALCA	3099	885.5	1439.5	1123.75	947.5	494.5	1566	1109.75	1269	3055	1543.5	953	1351.5	864.5	1483.25
CALCOCO1	6390	8186.25	7787.75	8358	7403	5644.5	5806	4654.25	5986	7970	5046.5	6374	4723	5317	4658.75
CALCOCO2	8807	10167.8	9858.25	10114.5	8790	5655	5434.5	5490.75	6067	9512.5	6116	6050	3857.5	4917	5036.25
CALCR	779	1448	1523.75	1183	636	1032.5	1211.25	1363	922	625	771.5	2100.75	1602.5	1392	1358.25
CALCRL	82	3152.5	3058.25	5589.25	2990	3017.75	2017	2650.5	2938	259	2138.5	3104.25	1887	2054.5	2307.25
CALD1	10662	11599.5	11622.5	11395.5	10702	10497	10230	10907.8	10497	9058.5	10832	10997.8	10275.5	10453.5	10508
CALHM2	5753	6741	6293.25	6547.75	3095.5	4929.5	5086.75	4257.75	4428	7613	4281	4190	4587.5	5845	4963
CALM1	6483	3719	1631	2392	4901.75	11017	11041	11126	11120.5	7483	10369	11249.2	10951.5	11414.5	10960.5
CALM3	11444	4777.25	3346.25	2791.5	11658	11521	11630.5	11659.8	11448	11611	11752	11646	11676.5	11515	11557.8
CALML4	5611	3870	2095.75	3811.75	5422	8692.5	4724	4506.75	8826	5129	3843.5	4181	5154	4178	4921
CALN1	1356	2051.25	2713.25	1768.5	958.75	6072.5	5541.25	5904.5	6302	1422	6294	6278.75	5866	5702.5	6225.75
CALR	11798	9627	9811.5	10146	11724	10493	10746	10743.8	10490	11800	10640.5	10711.5	10385.5	10926	10729.5
CALU	11783	9540.25	9558.75	10018.2	11041.5	10735	11001.8	10954.2	10325	11716.5	11481.5	11004	11250	11432	10840.5
CAMK1	3588	3851.5	4807	3305.5	3169	4819.5	4364.5	4839.5	6037	5474	4698.5	4878.25	2967	6997	5588.25
CAMK1D	1266	6978.5	6189.5	5197	4641	3368	4221.25	3114.5	4202	1534	1367	3809.75	3577	3741	1701.25
CAMK1G	1318	1867.75	1633.75	1506.5	142.5	5463	4078.5	6551.25	3873	1410	2485.5	5671.5	3435	6701.5	4247.5
CAMK2A	1949	445.75	1395.25	167.75	1417	613.5	1343.25	94	1127	2112	1022	93.25	173.5	749.5	272
CAMK2B	2205	3535.5	3381.75	2539.75	1706.5	2148	2168.75	2336.25	3744	2365	2083	2162.5	1217	1796	2522.25
CAMK2D	6192	9229.25	9271.25	9534	9846	4362.25	4829.5	4627	5076	8139	3151	4095.25	3955.5	4437.5	3255.5
CAMK2G	4986	6647	6379.25	6228.25	5312.5	5943.25	5377.5	5279.25	5236	5460	6318	5247.5	5270	5200.5	6451.5
CAMK2N1	9019	8792.5	8107.25	7179	10155	8528.5	8588.25	10092.5	10565.5	10746.5	4303	9582.5	10054.5	10978	7826.25
CAMK2N2	5087	1667.75	1536.5	1657.5	1466	1215	732.25	1630	454	5065	69.5	2221.25	1303.5	913	616.5
CAMK4	8631	1185	960.25	1852.75	1688.5	919.5	1023.5	2021.75	489	1955	192.5	550.75	625	589	635.5
CAMKK2	5782	7668.5	8120	7922.5	7650	3163.5	5578.75	5740.5	4389	6867	3017	4867	3391.5	6366.5	4726.5
CAMKV	1571	2154.25	4546.25	2093	453	1517.5	1368.75	1343.5	2337	1621	7721	957	586	969.5	1438.5
CAMLG	5111	10201.5	11004.8	10285	8465.5	11066	11129.2	11243.8	10952	4771	11209	11234.5	11058	11360	11210.2
CAMP	6117	352.75	789.75	1352.5	2440	2470.5	1478.25	2306.25	1971	5938	2642.5	172.5	1040	1390	996.5
CAMSAP1	8263	6989.5	6128.25	5281.75	6380.5	7243	6499.5	6492.5	6226	8239	6782	6451.5	6978.5	6001	6613
CAMTA1	1422	9672	9957.5	9982.25	9343.5	2647.5	3882.25	2906.25	3372	1848	2987	3583	4841	4968.5	2085.25
CAMTA2	5573	4252.25	5711.75	4386.75	4829	1887	2673	2652.5	1396	7578	1826	1706.75	2609	1546	2288.75
CAND1	10901.5	9300.75	8533	9579	8772	5695.5	6956.25	7115.25	5847	10895	8958	7611.5	6206	6893	7345.5
CANT1	6303	6170.25	5364.25	5414.5	6847	8482	8327	8362.5	7973	6740	9098.5	8643.75	8836	8922.5	8480.25
CANX	11797	11548.5	11626	11555.5	11729	9787.5	9410.25	8984.75	9450	11775	10212	8947.75	8907	9698	8904.25
CAP1	11719	11366.2	11237.8	11458.5	11636.5	11596.5	11616	11622	11461	11739	11463.5	11568.5	11668	11627.5	11473.8
CAP2	10518	4993.25	2930	4110.5	6438	8086.25	4233.75	8826.75	7572	9439	10832	8817	8582.5	7451.5	7910.75
CAPG	8021	9717.5	6449	10531	9040.5	6406.5	6121.75	7368.25	4434	10187	2604.5	4478.75	4883	7596	4446.75
CAPN1	8181	4618	5255.75	3955	7446	10527	9033	9210.75	10412	9938	8046.5	8978.75	9487	9305.5	8326
CAPN10	3169	2882.5	2346	1083.25	2839.5	4550	1939.75	1151.75	4918	3474	2330	1654.25	2344	1228.5	1437
CAPN11	799	856.75	450.5	332.25	650.5	2241.75	1981.25	2177	1958	848	2873.5	2337	2147	1749.5	2618.25
CAPN12	3029	2412.75	3437	3719.75	2989	2954	3511.25	3333.25	4093.5	3228	4124.5	3473.5	3754	3172.5	3331
CAPN2	10974	11538	11525.5	11570.5	11205.5	5143	6082.75	5225	5404	10997	5171.5	5036.25	6264.5	6409.5	4772.75
CAPN3	5921	8918.5	10395.2	9623	10964	10392.5	11167.2	10298.5	11195	6201	9660.5	10628.8	11779	10482	11075.2
CAPN5	3985	3058.5	3785.25	2713.25	3095	7605.75	9183.25	9193	8997	7411	8513.5	8479.5	9712.5	9867	8051.5
CAPN7	8375	8626.25	7751	8515	6745.5	4894.5	4454.5	4813.5	4433	8997	5851.5	5682.5	4519	4110	4752.75
CAPN9	1023	1110.25	2076.5	1204.25	436	924.5	571	405.75	1075	1160	867.5	738.75	351.5	621.5	1507.75
CAPNS1	11622	10349.2	10568.2	10644	10799.5	10979.5	11191	10940.2	10420	11725	11200	11100.5	11176	11298	10528.2
CAPRIN1	11629	11058.5	11006.5	11126	9787.5	8639.5	8303	8759.75	8140	11652	8768	7735.5	8636.5	8587.5	8317.25
CAPRIN2	6441	8894.25	8312	8208	7670	6124	6964	7127.25	6555	4812	7114	6981	9228	7088.5	6624.75
CAPS	5269	2910	1341.75	1474.5	3345.5	6088.5	5398.5	4314.5	5951	5906	4259.5	4974.25	5293	5062	4848.75
CAPZA1	11631	11491.5	11378.2	11459.5	11055	6524.5	6426.75	6393.5	6015	11584	6116	5447.5	5653	5584	6271
CAPZA2	11316	11001	10846.2	11293	11254	10878.5	10569.2	10796.8	10291	10637	11356.5	11023.2	10103.5	11206.5	10806
CAPZA3	70	1220.75	810.75	525.5	209.5	233.5	320.5	726.75	470.5	65	1586.5	808.5	554	500.5	1400.25
CAPZB	11635	11007.5	10974	11080	11051.5	10667	10537.5	10399.8	10132.5	11562	10153	10169.8	10517	10597	9410.5
CARD10	3951	6253.25	5236.25	5183.25	2909.5	4904	4258.75	4549.25	6508	4082	8496	3604.75	4883	4172	5390
CARD11	1551	878.25	2244	2970.75	2631	5867	4193	4219.75	5243	1651	3698	3878.5	3342	4968.5	3812.5
CARD14	3498	3841.75	2408.25	3722.75	4329.5	2852	6200.75	6832.25	2400	3552	7114	6192.5	6676	5365.5	7009
CARD8	7937	7740.25	7556.5	8180.5	7414.5	6301.5	6908.5	5004.5	6379	6037	5780	4998.75	7210	5365.5	5527.25
CARHSP1	9861	4896.5	5877.5	5676.75	5361	10218.5	10690.5	10618.2	10882	9440.5	9223	10048.8	11234	10901	9923.5
CARKD	6868	9031	8765.25	8768.5	8482.75	8475	8146.25	8295.75	9069	6947	8340.5	8033.5	8925	7551.5	8398.75
CARNS1	1247	1662.75	2572.25	2164.25	1847.5	2402.5	2489	1629.25	2069	1160	1448.5	2071	1887	2733.5	2126
CARS	6942	10681.8	10397.5	10647.8	9621.5	8403.5	7756	8577.5	8848	7484	7592	7623.75	7377.5	8721	7913.5
CARS2	7714	7749.5	8282	7519.5	7158.5	7119	7245	7301.75	7199	7684	7482	6266.5	7233	7063.5	6205.25
CASC1	34	1340.75	1774	797.25	183.25	574.5	652	844	1038	48	2261	557.75	554	370	1042.5
CASC2	272	1087.25	2414.75	1449.25	257.25	2234	318.75	330	1856	419	40.5	329.25	25	430	279
CASC4	8093	10586	10293.5	10056.2	6870.5	5155.5	4906.5	4807	1744	8182	3323	4477.25	3368	4003.5	5418.5
CASC5	8131	2611	1763.5	3124.25	5489.5	2140.5	2669.5	2423.75	2025	6688	1077	1887	3225	2317.5	3238
CASD1	8636	5247.25	7281	6025.75	6288	3493.75	3523.25	3966.25	1313	7770	4303	4074.25	2572.5	2920.5	3820.25
CASK	6942	7895.25	9067.75	8546.25	9000	5251	5027.75	4738.75	4800.5	7203	5065	5058.5	4974.5	5158.5	5042
CASP1	8643.5	9222.75	8917	10416.5	8292	8844	9166	7208.25	8524	4145	5026	10111.8	10925.5	9313	6583.5
CASP10	936	2732.75	2916	2971.25	3675	2424.5	2253.25	2219.75	2563	903	1924.5	1884.25	2422	1741	2334.75
CASP2	10147	9353.5	9456.25	9137.75	11248	11132	10928.8	10974.8	10799	8991	11286	11026.8	10909	10543	11015
CASP3	7770	6941	4428	7418.5	5517	8710.5	8798.75	8232.5	9683	7274	8163	8310.25	9472	9212	9401
CASP4	8630	7503.5	7885.75	8133.5	8780.5	9799	9394.75	9468.25	9934	8640	5430	10723.8	10323	10385.5	9029.75
CASP5	240	384.5	488.5	1049.75	753	852	563	272.25	380	258	14	393.75	247	1629	273.25
CASP6	5466	6365.25	5778	5693.5	5068	4800.75	4725	4597.75	5345	4518	4430	4840	3279.5	5365.5	5150.75
CASP7	8049	7107.25	7170.25	6993.5	7868.5	5016	4578.5	4748.75	4464	6944	4879	4804.5	3725.5	6643	4318.25
CASP8	5802	7544	5111.75	9178.25	4869	2318	1325.5	1250.5	1784	4743	1270	602.5	625	625.5	768
CASP9	5860	3995.75	5928.75	4885.75	6376	6400.5	6510.25	5425.75	5583	5259	3674	5328.25	8388.5	5659.5	5233
CASQ2	1614	3002.5	1954.5	2247.5	1704	1520.5	1734.5	2128.5	1852	1212	2023.5	2338	2380.5	2245.5	2256.75
CAST	10311	11606.5	11467.5	11459	10663	7503.25	9594	8752	8008	9985	8768	9101.25	8371.5	8790	9253.25
CASZ1	2437	5603	4775	5701.5	9932.5	5567.75	5266	2941.5	5778	2823	3112.5	3960.75	6241	4148.5	4016.25
CAT	10023	11515.2	11343.5	11471	9333	9036.5	7976.25	7830.25	9497	10545.5	6476.5	9057	7127.5	7976	7824.75
CATSPER1	1783	506.5	781.5	1475.25	229.5	1652.5	1796.5	1268.75	790	1964	471	842.5	2229.5	3071.5	889
CATSPERB	19	741	1356.5	857.5	218.5	503.5	143.75	61.5	676	20	121	86	30.5	255	129.75
CAV1	8073.5	11649.5	11707.2	11479.5	10911.5	10571	11185.2	11081	10428	8407	9871.5	11527.5	10986	11045.5	10523.5
CAV2	9144	10981.2	10783.8	10647.8	8918.5	7514.5	8123.75	8915.75	7649	9860	6803	9911	8701	8108	6600.5
CBFA2T2	5028	9813.25	9855.75	8905.75	8924.75	5689	5561	5192.25	5282	4812	6399	4967.25	6632	4917	4677.5
CBFB	11474	9821.25	9957	10374.8	10602	9157.5	8858	9165.75	5470	11166	8896	8290.25	8355	8645.5	8922.5
CBL	7746	7523.75	6795	7868	7132.5	6058	6250	6875.25	4787	8378	7766	6927	5223	5916.5	7376
CBLB	6548	7685.25	9153.75	7910.75	5978	8752	8132.75	8651.25	8630	8562	7053.5	8621	7465	8758.5	7344
CBLL1	8939	6569	4497.25	5174.25	5163	8511.5	8344.5	8686	7332	8391	8696.5	8033.75	7932	7767.5	8624
CBLN2	1677	753.5	2077.75	1428.25	2360.5	1378	1408	126.75	2126	1449	314	516.25	868.5	297.5	238.25
CBLN3	2641	2716.75	3517	2708.75	2207	5486	4770	3847.5	4756	3009	2957	4855	4078	5431.5	4670.25
CBLN4	796	838.5	1571.75	1294	745.5	935.75	1391	1214	657	710	819	692.5	1217	1749.5	731.25
CBR1	11124	8432	7197.5	8431.5	6434	7238.5	6221.75	6606.75	7113	11282	4772	7912.5	7019	7590	5381.75
CBR3	4530	8340.75	8994.75	8711.75	10503.5	8267.5	9207.25	9099.5	7710	5007	5686	9479	10002	8485.5	9427
CBR4	8327	8822.5	9582.25	8069.25	8434.5	6304.25	6378.25	5844	7418	8563	5557	7287.5	7550	6401.5	6479.75
CBS	5439	2545	3138	2623	3479.25	6947.75	6304.75	8274.75	10682	5136	5707.5	6146.75	8925	6863	7777.25
CBX1	6478	9831.5	9217.25	9591	9586.5	4918	6327.75	9095.25	5273	6516	8576.5	7531	4950.5	5293	7779.75
CBX2	4184	1511.5	2384.5	1923	3415.5	7649.5	7722.25	7094.5	7350.5	4165	8976	8025	9607.5	5962.5	7942.5
CBX3	10057	11198.5	11551	11447.5	11326.5	8787.5	10380.5	9669.25	9326.5	10339	10235	10168	10374.5	8540	9668.5
CBX4	6433	10648	10789.8	10647.5	6459	8323.5	9580	9108.5	7466	6871	8281.5	9884	10225.5	8467.5	8910.5
CBX5	10788	8588.75	10001.5	5696.25	8729.5	7092	7581	7218.75	6508	11082	8438.5	7436.75	7528	7430.5	7017
CBX6	8163	8463.25	10314.5	8721.5	10891.5	10177.2	9909.75	9572.75	9302.5	9132	9977.5	8756.5	10742.5	7789	9980
CBX7	2811	8071	7672.5	8092.25	6625.5	7310.5	8127	7030.25	8107	2951	4336.5	7900.5	8773.5	5585	6905.5
CBX8	5762	608.75	1789.75	1534.25	1967.5	3944.75	4282	3759.5	4262	5015	4355.5	4708.75	4611	4151.5	4915
CBY1	3182	6559.25	6962.5	5270.75	8043	8576	9330.75	8870.5	8628	3137	9065.5	8488.75	9991.5	8872	8720
CC2D1A	5621	5097	6357	4891.25	3584.5	4587.5	5062	4681.25	4498	6280	2957	4740.5	4768	4425	4570.75
CC2D1B	6951	3035.5	2006	3020	4243	6070	6077.25	4470.75	6073	7963	4500	4690.5	6498	4127	4734.5
CC2D2B	39	1800	1880.5	1356.75	857	620.25	999.5	426	566	50	26.5	267	708	487.5	433
CCAR1	7753	8140	9315	10542.8	7743	2392.5	3234.75	2661.25	2256	6783	2782.5	2219.25	2701	2595.5	3264.5
CCBE1	1195	5122	3086.5	3566.25	2091	9974.5	10739	10686	11176.5	1289	10616	11035	11014	11131.5	11366.8
CCBL1	3402	3443.25	3566.75	3150.25	2946	5474.25	4088.25	5262.5	6244	3494	3910	3587.75	5109.5	4536.5	3290
CCBL2	5986	9595	9472.25	9482.75	10300.5	7155	8473.25	8428.25	7710	6696	7053.5	8599.5	8388.5	8168	7808.25
CCDC101	5899	3551	4702	3897.25	5046.5	6198	5699.25	5077.75	6519	6574	5661	5685.25	6145	5931	5144.25
CCDC102A	4021	1428.5	1382.25	1020.75	1646	7487.5	7202.25	7121.25	6342	4480	8927	6545.25	7275	5852.5	8119
CCDC102B	217	2354	998.75	984.25	1391	927	484.5	644	772	230	438	1128	322.5	121	900.25
CCDC106	4709	569.25	1608.25	1668.5	2653	9107.5	8713	8677.75	9247	5990	7114	8654.75	9164	8877	9147
CCDC109B	6405	7568.25	8203.75	8440.5	6021	8960.5	8517.25	8007.5	7400	8230	6163.5	7966.5	7650	10287.5	7645
CCDC110	346	1488.25	2088.5	436.75	188.5	936	689	1644	807	181	656	2258.75	292.5	1629	2980.25
CCDC112	2760.5	3721.5	2956	2362.25	1433.5	3691.5	4597.5	5050.25	2949	1252	5026	4774.75	5422	5466	5424.75
CCDC113	1999	3870.25	2835.25	2297.25	4375	1199	1991.75	2257	1373	1577	1681	2258.75	1971	1345.5	2786.5
CCDC114	1957	334.25	180.75	138.75	2292.5	609.75	380	369.5	583	1991	17.5	215.5	147.5	255	272
CCDC115	6920	9202.75	9085.75	9122.5	5939.5	8580	8229.75	8753.25	7281	6213	9134	8487.5	9211.5	8223	7471.75
CCDC117	8285	7586.5	7495.75	7715.25	9033.5	7808.5	7445.75	7781.25	7122	8548	9049.5	6977.5	6515.5	7699	8378.75
CCDC12	7099	9064.25	8074.75	8200	8053.5	9723.5	9251.25	9378	9551	7423	9304.5	9726.25	8806.5	9372	9567.75
CCDC120	3334	1781	1512.25	1041.25	1254.5	5035	4576.75	4075	5580	4001	5065	4445.75	5020.5	3902	4449
CCDC121	3558	1605.75	2149.75	1457.25	2464	2690.75	2989	2793.5	3228	3498	4455	3326.25	4050	3142	3370.75
CCDC124	8832	2934	3673.5	4220.5	3358.5	6107	6697	6619	5757	9001.5	4952	6175.75	6676	5901	6366
CCDC125	5197	1225	2755.5	2661	3017.5	2163.5	9694.75	10023.2	1028	3050	10126.5	10411	10505.5	10451	10919.8
CCDC126	7837	7135.75	6511.75	7801.5	4166.5	3640	3847.5	4144.75	2590	7625	3933	5454.5	2229.5	3401	3795.25
CCDC127	6338	6320.25	6721.75	6045.75	5803.5	6203.5	6744	6161.75	6097	8307	6957	6629	5399	7387	6046.5
CCDC129	744	1051.25	1628.75	1096.25	755	1165.5	1090.75	739.5	1556	640	962	740	268.5	899	1386
CCDC13	3488	2506.25	5654	2993	1262	1393	2271.25	1954.75	1262	3786	2222	2888	1700.5	1405	1884
CCDC130	6199	5817.25	6425.5	5798	5562.5	11072.5	9750.5	9753.25	10782	6538	8163	10057.5	10517	9779.5	9971.5
CCDC132	3993	7905.5	6947.75	8869.75	9198	4480	5110.75	6209.5	5084	3317	7171.5	5950.25	5176.5	4758	6663
CCDC134	6556	3668.25	3302	3387.75	7655	3646	3670.5	3080.75	3296	6616.5	1681	2730.25	3225	3669.5	3029.5
CCDC136	3160	2566	2708.5	1990.25	3042.5	4426	3963.25	5561.5	3817	3108	8560	3765.5	5041	3263.5	5870.25
CCDC137	5404	4441.5	3223	3254.5	5626.5	3780	3832.5	3454.75	2985	5199	3073	3499.75	4027.5	2173	3856
CCDC138	4823	2281	1948	1392.5	2677.5	2794	2439.75	3536.5	2018	2612	5246	2051.25	2609	2566.5	3237.25
CCDC14	9958	9666.25	9895.5	9488.5	9358	9380.5	9067	9537.25	9025	7672	9894	9446.5	10364.5	8974.5	10537
CCDC140	3017	1155.75	2235	951.25	1577	4553	1591.25	1334.5	5482	3386	1726	1678	1303.5	1177.5	1037.75
CCDC146	543	7361.5	5456.25	6477.5	2584	2240	3008.75	2282.5	4124	438	4652	2973.75	1432	2285.5	3123.75
CCDC15	2350	2614.5	2698	3909	1897.75	3375	2778.75	3594.5	3727	2044	3044	3254.5	2609	4145	3691.5
CCDC151	2222	2273	3142	1649	388.5	1934	2581	3348.25	1592	2392	6071	3481.75	2422	4229.5	2555.25
CCDC17	3042	1585.25	2629	990	3102	1911.5	1571.75	858.5	1336	2885	438	858	949	1228.5	823
CCDC18	4013	1169	2117.25	1398	1317.25	2560	3589.5	3971.75	2180	886	4522	3084.75	3577	2994.5	4744.25
CCDC22	5376	3981.75	4142	4142	4677	4672.75	5420.25	4970	5390	5911	4566	4927	6095	5090	5335
CCDC23	1546	6544.25	4223.25	5752.5	5858	9207	9926	9811.5	9776	1703	9787	10217.8	10265	10131	8925.5
CCDC24	3148	372.5	322.25	296.75	1524	5614.75	5299.5	5595.5	6190	3400	4587.5	4325.5	6441.5	6337.5	6191.25
CCDC25	10215	7677.5	7306.5	7125.75	9138	8893.5	7466	8324.75	9645	9143	9388.5	8545	6834	7668	9175.5
CCDC28A	6811	7674	6435.25	7833.25	6727	8524.5	7745	8761.75	9980	5559	7417	8974.75	8355	8772	8871.5
CCDC28B	3815	2725.25	2243.25	2216.25	1895.25	6147	3922.25	6411.5	4478	4495	5594	5466.75	3435	5625	5456.5
CCDC3	795	10928	10476.5	9990.75	9082	4252	3692.25	2541.5	6969.5	1137	2369	2051	2928.5	5982	3353
CCDC34	3335	6061	5744	6112.5	3369.5	8147.5	8891.75	9995	9574	2115	9938	9783	8464.5	9241.5	10323.8
CCDC43	8566	5873.25	7031.75	6440.25	8775	5462	6715.5	6843.5	6643	6896	8319	6795	6264.5	4941	6365.5
CCDC47	11306	9373.25	9333.75	8763.5	10608.5	4702.5	7391.75	6934	5391	10588	7285	7822	7725	6489.5	7315
CCDC50	10640.5	9333.25	10117.5	9053.25	10454	10715	10612.2	10730.2	10059	10382	9203	11201.5	11100	10597	10791.2
CCDC51	3883	6072	7241.25	5935.25	4750.5	6618.5	6705.25	6891.75	6538	3953	7608.5	7153.5	7060	6388	7462.5
CCDC53	5431	8794	7770.5	9235.25	9385	9288.5	9127.75	9459.5	9135	4439	7329	9486	9487	9704	9106.75
CCDC57	4029	3075	1679.75	1939.75	4255.5	1850	1863.25	1571	1273	3901	1320.5	1281.5	998	1479.5	1285
CCDC59	9252	8257.5	8105.25	7393	8420.5	9550.5	9677.25	10377.2	8951	7594	11291.5	9855	9893	10135	10354
CCDC6	8475	11123.5	10510.8	10657.5	10968	9472.5	9602.5	9975.75	9927	8212	9925	9461.5	8925	9906.5	9827.5
CCDC62	317	3549.25	2311.75	2392.5	250.5	2191.5	822.25	1026.75	3000	353	2023.5	1130.25	826	968.5	1552.75
CCDC68	110	2394.75	2943.25	1893.5	220.5	2151.5	722.25	1555.75	2859	149	771.5	1161.5	1602.5	1138.5	1511.5
CCDC69	1407	4416.25	2746.75	3439.75	5487.5	2066.5	3402.5	3233.5	4385	1387	3323	3141.5	2737.5	3368	2099.5
CCDC71	5379	2002	3786.5	1778.75	1766.5	4744.5	4260.25	3542.25	4010	7267	3933	4984.25	4050	3768.5	3416.25
CCDC77	7833	2780.25	3104.75	2340.5	3153.25	7426.5	7414.5	7467	7846	5883	9905	7004.75	8773.5	7420.5	7993.5
CCDC78	3595	1149.25	2385	1267.25	3069	890.5	538.25	592.5	629	3443	192.5	580	1126.5	680	1250.5
CCDC8	3086	4954.75	4678	3131.25	3960.5	2682.5	2460	2595	2970	3334	5935	4759.25	1520	487.5	976.5
CCDC80	2961	11545.5	11052.8	10568.8	9001.5	2741	1279.25	1894.5	2461	3442	1681	2739.25	1392.5	1583	1831
CCDC81	681	431.75	1127	1494.75	241	1781	949.75	1401.75	1366	573	438	1921	1700.5	1962.5	1046.25
CCDC84	6992	9153	8729.75	7957.5	8610	7032.5	4988.75	5055.75	7092	5209	3770.5	5351	3754	5139	6090.75
CCDC85B	5763	6219.5	7471.5	5833.25	4149	3282.5	4220.75	6025.75	3511	6574	4675	5333	4703	6924.5	5120.25
CCDC85C	4495	5159.75	4585	4471.5	8824.5	7060.5	5559.75	7371	8075.5	4481	5612.5	6962.25	5541.5	3927	6330.5
CCDC86	7244	5842.5	6701	6733.75	6868.5	8841.5	9596.25	9567	8305	6249	9629	8929.25	9361	9557.5	8960.5
CCDC87	1616	232.25	300	276.25	396.5	339	1264.5	1403.25	359	1766	1077	638.5	1887	1526	1255.75
CCDC88A	9919	6636.75	6859	7040.75	5445.25	5720	4372.75	4814.75	5236	6971	5935	4625.75	4519	4280.5	4520.25
CCDC88B	3780	1132.5	2674.75	2969.75	3332	3449.5	3174.5	2523.25	2225	3772	1586.5	2501.25	1351.5	3902	2712.5
CCDC9	5142	3377.5	4863.25	4859.75	2038.75	2525	2319.5	2014.5	1330	5390	2841.5	2041.25	1700.5	3318	1515.25
CCDC90B	6741	9537.75	9474.75	10453	7775.5	10053.5	9955.5	10544	10430	5949	10078.5	10653.8	10288	10882	10790
CCDC91	6618	8081	6862.75	8260.75	5462.5	5447.5	6953.25	6555.5	3897	5067	7227	7187.25	6613.5	7063.5	6415.5
CCDC92	2628	6874.75	7032.75	6515	8719.5	9677	9067.75	8682	9629	5194	7742.5	9261.75	8944	9546	9303.5
CCDC93	8061	6053.5	4962.5	5523.75	8007	2703.5	8631.25	8218	2069	7527	9455.5	8125.75	10204	8729.5	8835
CCDC94	5410	3340	3151.5	2443.25	5216.5	4906	7766	7456	4731	5152	6116	7407.5	8873	8148.5	7881
CCDC97	6336	4382	5367.25	4495.25	5239.5	7702.5	8468.25	7619.25	7598	7522	9347.5	8587	8448	7774.5	8140.75
CCK	2944	389.5	1211	1389.75	421.5	429.5	742.5	878.75	840	3293	771.5	912	1.5	327	251.75
CCL11	1778	587.25	143.75	246.5	428	646.5	1759.75	806.5	622	1968	1125.5	1326.75	121.5	969.5	704.75
CCL13	1288	5994.5	3621	7935	4991.5	4606	3992.5	5076.25	3821	1540	4303	3242.75	5223	3653.5	4019.75
CCL17	2712	1601	1059.75	2680	1866	943.75	1703.75	430.75	528	2481	1879.5	541	2508	515	1031
CCL18	3996	7249.75	2843.75	10568.8	6821.5	2276	1423.75	4182	2940	767	1497	1879.75	5353	4378.5	1739.25
CCL19	667	8621.5	7744.25	11501.5	9155.75	7005.5	4310	7120.75	6065	672	3273.5	3813.25	4176	5845	1376
CCL2	1638	6830.25	2846.5	9929.5	8790	10268.5	9111	9814	8762	4402	8596	9207.25	8162	8757	8316.75
CCL20	4630	1487.5	329	1733	1981	3513	2510	3506	4709	838	1270	2046	1887	6093	4035.5
CCL21	1976	7697	4983.5	7264	6153	6331.5	3286	5488.25	5596	1840	2604.5	3855.75	2667.5	3627.5	2508.5
CCL22	2872	4264.75	512.75	1653	3970.25	1865	2015.75	728.25	1011	2807	397.5	460.25	1392.5	1054	499.5
CCL23	208	1912	937.5	1334.25	1763.5	5051	2920.5	2657.5	5908.5	187	2873.5	2358.75	2928.5	1818	2026.75
CCL24	1698	1220	860.25	2226.75	1248	555	805.75	538.25	589	1661	656	232.25	1602.5	707	918.75
CCL26	755	2273	1291	302.25	1225	2039.75	2377.5	2592.5	2202	858	2138.5	2848	2640	3094.5	2344.75
CCL27	1264	10951.5	8855.5	7906.5	5293	1036.5	1995.25	1556.75	1229	1492	1726	1585	2667.5	1228	2303.25
CCL28	7743	5088	5474.25	5197.25	5715	2874.5	4157.25	3366	4393	5749	438	4498	3675.5	3018	3232.25
CCL5	5296	3654.75	2158	9033.5	4143.5	10945.5	11508.5	10308.8	10432	6070	8912.5	11397.8	11082	10024	7354
CCL8	461	4416.25	3467.25	9029.75	8721	8620.5	7474.5	7213.25	6471	533	7800	8511.5	8111.5	9160.5	5367.75
CCM2	7048	4945.75	5187.5	7024	3299	10614.8	10099	10612.8	10825	6682	9534.5	10488.8	10474	10629.5	10305.5
CCNA1	841	951.25	1707	956.75	585.5	1255.5	2896.25	211.5	415	866	109.5	140.5	4950.5	357	139.5
CCNA2	10539	3742	2064	4707.25	7403.5	7038.5	7991.5	6935	4706	9852	7053.5	5975.75	7060	5533.5	8410.5
CCNB1	11584	3689	2415.25	6128.5	6644	5749	5502.5	6420.25	3598	11138	7459	4918	4768	5965.5	6936.75
CCNB1IP1	7435	9338	10676	9011	10255.5	9766	10358.5	10412.8	10654	6047.5	10248	10471.2	10654.5	9974	10842
CCNB2	10766	3951	2830.5	5187	5272	8963.5	9598.25	9022.5	7683	8702	9014.5	4920.25	9926	8662	10224.2
CCNB3	529	885.25	1818.25	960.5	271	732.25	514.5	494	1722	708	1924.5	360.5	187	414.5	589.75
CCNC	11339	10835.2	10788.2	11000.5	10198.5	6355.25	7087.5	7921	6273	10484	6651	6524.5	6879	6369	6793.75
CCND1	10924	10578.8	10548	10552.2	10191.5	11535.5	11367.5	11645.8	11535	11649	11063.5	11570	11470.5	11636	11500
CCND2	755	10174	10019.2	9861.75	11147	9212	9549	9624.75	6591	905	5492.5	9368.75	8836	7686	6137.5
CCND3	7643	8390	9616.75	9429.25	8062	11315.5	11002.5	10815	10960	9077	10454	11195	10829.5	11124	11053.2
CCNDBP1	6454	10007.2	9858	10332	8567	11092	10868	10581.2	10467	7645	9815.5	10610.2	11320.5	10433.5	10950.5
CCNE1	6875	2849	2397.25	2181.25	6354.5	6600	6445.75	5109.5	5275	6648	8596	5091.25	6959	6934.5	6351
CCNE2	8000	2375.25	2469	2803.25	3775	5083.5	5213.75	5584.75	1732	7849	5471	4474.75	5353	4794.5	5758.5
CCNF	7329	3033.5	2892.25	4020.25	7277	8530.5	8110.25	8058.25	7231.5	7289	9134	7013	10193	7511	8545.25
CCNG1	10857	10956.2	11414.2	11209.5	10564	9847.5	10562	10049	9878	11070	10991	10766.5	10039	10288	11032.8
CCNG2	6006	11031	10860.5	10649	10472.5	6667.5	5389	5200.5	4956	6843	6208	6802.5	3602.5	4414.5	6015.5
CCNH	8916	8452.5	8960.75	9505.75	9429.5	6530.5	7539.75	7882.25	7156	7718	7577	7291.5	9117	6883.5	7642.75
CCNI	11451	11500	11629	11466	11593	11667.5	11647	11653.5	11638	11605	11551	11686.2	11649.5	11597	11624.8
CCNJ	6308	2923.75	2846.75	3498	7522.5	1408.5	1712.25	2566.25	585	5588	3273.5	2044	1931	2173	3035.5
CCNJL	5112	738.75	2242.75	811.75	3554.25	3348	2594.75	3900.25	1294	5610	4478.5	3058	3146.5	2207	2522
CCNK	7718	8092.5	8855.25	8457	9835	9581.5	9662.5	9447.5	8468	8881	9223	9542.25	9965.5	9843.5	9424.75
CCNL1	10936	10938	10828	11305.5	10065.5	8823.5	7993.5	8172.25	8168	10103	7264	8090.25	6999.5	8422	8839
CCNL2	7743	11334.5	11328.5	11068	11089	4253.5	4571.25	4094.5	1686	6714	4748	3929	6120	4123.5	5366.75
CCNO	5358.5	2133.5	3140.25	2698.75	4281	4557	3925.5	7599	4574	4436	2523	3680	3251	4917	5843.5
CCNT1	10519	8834.5	8550.5	8493	8765.5	4885.5	4190.5	3204.5	5326	9242	4952	3226.75	3675.5	3172	3625.25
CCNT2	9072	7480.25	6513	7346.25	6740.5	5810.5	6883.75	5662	4409	7911	6496.5	5805.5	7233	5627	6103.25
CCNY	6568	9832.25	10148	9343.5	10347	9219.5	8262.25	7648.75	9467	8190	8263	8392.5	7233	6883.5	8246.25
CCNYL1	5783	6119	4531.75	6199.25	4839.5	4729.5	4199.75	4680.25	3699	5585	3151	3696.25	3725.5	3814.5	4224
CCR1	1105	3986.5	2419.5	5625.75	3365	4577	5097.5	4062.5	2471	704	4020.5	5250.75	4027.5	5827.5	3384.25
CCR10	2317	817.25	1388.25	824.25	953.5	2319	2601.5	2163.25	2088	2527	2023.5	1782	2572.5	1051	2162.75
CCR2	145	4172.25	3430.75	6169.5	2524.5	3693	4311.5	3954	2963	220	1681	3815.25	3368	3547	2043.5
CCR6	608	1873.75	1159.75	1947.25	2551	11806.5	11805.2	11798.8	11816	586	11797.5	11804	11800.5	11798	11795.5
CCR7	2328	2235.25	1679.5	6290.5	1754.5	4166	4200.25	5608	2631	2260	656	3237	3146.5	2984.5	894.75
CCRN4L	6368	1599.25	2851.75	1494.25	7863.5	6563.5	6292.75	6418.75	4574	6310	5451.5	4961	7356	7297.5	5898.5
CCS	5921	6115.25	5210.25	5502	3736	7867.5	7101	6547.5	9048	6065	5306	6525	6441.5	7161.5	6650.5
CCT2	11721	11097.5	11183	11326.2	11068	10633.2	10164.8	10655.8	10151	11520	11263.5	10514.8	10214.5	10431.5	11108.5
CCT3	10764	10505	10912	10881	11591.5	10824.8	10688	10673.5	10730	11063	11395	10914.8	11029	10824.5	10681
CCT4	11017	11287.5	11331.8	11201.5	11177.5	6365.5	5586.75	5909.25	5310	10477	7915.5	5559.75	5866	6196.5	6091.5
CCT5	11518.5	9518.25	9395.75	10351.8	11445.8	5107.5	5811.75	5118.25	5616	10974	7987.5	6038.75	5154	6530	5456
CCT6A	11407	10223.8	10193.5	10703.5	11344.5	9735.25	9688.5	10058	10138	11228	10939	10026.8	10235	10039	10494
CCT6B	1234	3467	3574.75	4126.25	5150.5	3460	3847.75	4321	4787	707	4377.5	4367.25	3857.5	4025.5	4160
CCT7	11713	9618.5	9728.75	9574.75	9618.5	11439.5	11179.2	11425.8	11331	11618	11623.5	11339	11150.5	11430	11526.8
CCT8	9477	11269.5	11409	11426.5	11429	11213.2	11236.5	11317.2	11185	8750	11544.5	11298.2	11404.5	11338.5	11286.5
CD109	11317	10839	10717	10596.8	10459	3205.5	4855	3734	2146	11453	1125.5	3329.75	4334.5	6224.5	1572.5
CD14	2306	8074	4751.5	9953	6107	11622.5	11270.8	11208.5	11683	2435	11478	11699.2	11335	11700.5	11358.8
CD151	10223	5847.25	6950.5	5856	7615	11634	11454.2	11626.5	11610	10900	10954	11637.2	11298.5	11700	11511
CD160	568	1290	1762	1659.25	1428.5	1945.5	730.5	752.25	2921	497	241	2246	292.5	447	521.25
CD163	390	7759.5	4729.25	10106.5	7256	9280.5	8405.75	8470.5	9357	468	8976	10138.8	7275	9224	8656.25
CD163L1	1866	3240.75	1021.5	4891.75	4418	5215.25	2329	4012.75	4114	1595	3770.5	4214.75	1931	3368	3978.75
CD19	2160	222.25	494.5	1283.25	641.5	3406	1539.5	4516	1301	2081	1320.5	2427.75	1174	2387.5	1485
CD1A	1230	10197.5	6241.5	8186.25	4184	1534.5	1883.5	1448.75	943	1176	2707.5	1357.25	2058.5	1087.5	1454.25
CD1B	12	3444	1100.75	5238.75	774.5	803.5	555	1184.75	762	9	241	1256.75	1558	829	1082.5
CD1C	1232	7788.5	7121.75	8336.75	5251.5	3354.25	1917.75	2695.5	2358	1134	1407.5	3169.5	2380.5	1667	2006
CD1D	3044	539.5	1292	708	1393.5	4258	3853.25	3211.5	5228	2974	2261	4397.75	3412.5	3978.5	1632.25
CD1E	1172	6570.5	2143	8126.75	1872.5	1874.75	1563	2017.75	2379	1113	2261	1720.25	2100.5	1962.5	1713.75
CD2	857	4767.75	1764.5	9468.75	4081	6026.75	8637.25	6683.75	5202	881	5026	8862	6857	5894.5	3325.5
CD200	8654	5249.75	5392	6927	6288.5	3632	2537	4889.75	3946	4201	152	5239.75	1652.5	2625.5	3551
CD209	1017	4640.75	3188.5	5414.75	3817.75	5674.5	3509.75	3840.75	5916.5	994	6227.5	5386.75	3602.5	4229.5	4097.25
CD22	2473	2277.25	4075	2751.5	2394	2103	1680	1896.75	2125	1831	5471	1746.75	2307.5	1962.5	2161.25
CD226	666	765.75	784.25	795.25	1041	742	906	651	582.5	1041	438	1094.25	121.5	208.5	198.75
CD24	79	11274.5	9596.75	11460.5	11491	4244	2264	4730.75	6011	348	471	2341.25	2422	2365.5	2126.25
CD244	941	457	809.5	580.25	2162	1372.25	1818.5	975	2165	894	543	985	905	1565.5	1015.25
CD247	1947	2627.25	364.75	4857	1585.5	6982	7858	6645	6921	1989	4455	7781.75	6515.5	5130	4474
CD248	2240	9422.5	8402.75	7225.75	5313	8163.5	7264.5	6549.75	6559	2209	7285	6129	5822.5	6369	6432
CD27	1492	3095	3457.5	8249.75	2575.5	5180.25	6442.5	5775.75	4206	1788	3294.5	7695.25	4768	4596.5	608.75
CD274	573	2090	2454	4754	2818.5	663.25	640.5	356.25	485	605	92.5	884.75	438	707	98.75
CD276	6518	6368.25	6522.5	6597.25	6132.5	9360.5	9360.5	9181.25	9358	7953	9675	9033.5	10148.5	9726	9408.25
CD28	1217	1566.25	1544.25	3849.5	2517	2190.5	2524.25	2614.5	2491	1298	3747.5	2346.25	1652.5	2923	2703.25
CD2AP	9453	9192.5	7695.75	8683.5	7381	4127.25	4623.25	4631.25	2597	9082	4587.5	4734	4288.5	4498	5596.5
CD2BP2	6441	4442	3681	5407.75	6695.5	10921	10501.8	10962.5	10926.5	6640	10348.5	11118.8	10594.5	10693.5	10891.2
CD300A	1620	4043	2090.75	4721.5	3363	6161	5888.75	4696.25	4851	1706	4377.5	6020.75	5471.5	8012	3726.5
CD300C	4715	1286.25	1259.5	1517	392.5	3510	3196.75	3278.25	2021	4777	1022	3663.5	2737.5	4689	2365
CD300LB	951	1339	2215	1679.25	495	976	945.5	760.75	724	997	132.5	821.5	515.5	755	793
CD300LF	1263	1567	1340.25	1552.25	1648	4557.5	4044.25	4164.75	3119	1387	2261	3802.5	4104	5196.5	2531.75
CD300LG	2471	2587	6097.25	3930.25	3789	3768	1585.75	1552.25	4886	2530	6436	1873	1558	1749.5	1343
CD320	7241	2539.25	3839	1643	5227	9364.5	10178.5	10142.2	9142	6923	8818	9922.25	10374.5	10250.5	9609.25
CD33	1917	710.75	546	2763.5	2428	5129	4522.25	3146.75	3969	1660	3323	4806.5	3342	4968.5	3074.5
CD34	1305	7705.75	7558.75	5701.75	4980.5	8434	8407	8172.5	8297.5	1430	7815.5	8648.5	6959	6883.5	8066.25
CD36	887	10339	7395	9810.5	9512.25	5458.75	4913.25	5621.25	7096	2205	7838	8063.5	5041	5727	3399
CD37	1840	3184	1145.5	8128.5	1461	5132.5	5461.75	5146.75	3017	2013	1681	5119.5	3225	6202.5	2619
CD38	1539	471	1077.25	1347.5	947.5	4977.5	5502	5724.75	3553	1610	2746.5	6290	4541	4451	1459.75
CD3D	568	5144	3044.5	10227.2	5933.5	7543.75	9091.5	7597.5	6111	503	4652	9117	7275	6489.5	1737
CD3E	479	1902.75	2444.75	5006.75	1568.5	2692.5	3955.75	2511.5	2376	491	867.5	4212	2468	2183	1315.5
CD3EAP	4388	3679	6735	5479.75	5285.5	3499.5	2761	3437.25	2607	4041	5889.5	3249.25	3146.5	3848	3693.5
CD3G	703	1101.5	765.75	3647.25	2321.5	2968	4568.25	3742.25	2851	807	2902.5	4455.25	3700	3787	3525
CD4	1411	6263.75	4757.25	8846	4361.75	5152.5	4895.5	4553.25	5811	1520	3820.5	6071	3577	5908.5	2963.75
CD40	1527	5335.5	7371	6850.25	3718.75	5014.5	3918	3387.75	3536	1518	3994	3941.5	3602.5	4178	3577
CD40LG	121	1037.75	1144.25	2378.5	486	739.5	683	455	1058	104	505.5	1198.25	247	662	372.25
CD44	10596	11715.5	11781	11700	11552	11650	11547	11570.8	11625	11191	11491	11753.2	11707	11747.5	11544.2
CD46	10116	11350.2	10960.8	11236.2	10544	9356.5	9313.25	8947.5	9126.5	10763	9098.5	9857.5	8499	9341.5	9190.75
CD47	10938	10881.5	10704	11114.2	10999	9478.5	9260.75	9323.5	8163	11298	8143	10066.8	8042.5	9661	8965
CD48	1346	5116.75	2546.25	10023.2	4732.25	6387	7745	7205.5	6060	1475	4237.5	8331.5	6008	7846	2743.25
CD5	2553	1306.5	1151	1900.5	1649.5	2690	2494.75	1761.75	1530	2693	177.5	2066.75	737.5	846.5	250
CD52	1449	6595.75	3363.25	10389.8	9009	8542.5	9564.5	8977.5	7304	2120	5828	8722	8182	7528.5	5387.5
CD53	1306	8481.75	6693.75	10820.5	8775	6758.5	7373.5	6654.75	5444	1221	4861	6867.25	6241	7298.5	4098.75
CD55	7040	11231	9490.25	9989	8259.5	8000	7197.75	6170	6999	8534	5513.5	7566	7150.5	7019.5	6418.75
CD58	9437	9349.25	8120.75	10110	8917.5	7988.5	8903.75	8290.25	6272	9241.5	7053.5	8368.25	7932	9855.5	7758
CD59	11632	11578.5	11693	11487.5	11756.5	9483	9994.5	8654.75	8229	11728	9152	11010.5	9098.5	7297.5	9983
CD5L	1714	939.75	725.75	864	355	977.75	1168.75	1276.5	2343	1730	162	638.25	905	1477	937.25
CD6	2516	3075.5	847.25	6674.75	2791.5	5576	6275.25	5495.75	3855	2465	3698	6203.75	5248	5179.5	1647
CD63	11832	11688.5	11769	11753.5	11728	10931	11614.2	11695.5	10935	11832	11639	11706.8	11685	11694.5	11684.8
CD69	125	6673.25	1687.75	9608.75	4909	3976.5	6596.5	5319.75	2035	148	2023.5	6054.75	5065	8333	1908.75
CD7	5932	385.25	1532	3135.75	1696	6457	6379.75	5601.5	3907	6615	3294.5	5929	4841	3787	1314
CD70	2891	2257.5	2489.75	1576	1526	2960	3855.25	2866.75	2396	3307	2604.5	5224.75	2812	4206	2335
CD72	1254	587.75	307	1773	1656.5	4940.25	4592.75	4599	4962	1428	3486	6108.5	3857.5	4738.5	3677.25
CD74	8661	11611.5	11525	11758	11692.5	11673.8	11743	11634.5	11436	9481	11075.5	11760.8	11680	11732	10742.5
CD79A	1375	2040.75	2830.75	4184.25	1660.5	5884.75	3932.5	8409	3815	1610	3216.5	4883.5	3700	6551.5	2917
CD79B	2382	2552.25	4968.25	3951	2505.5	8315.5	5705.5	7858	7440	2691	9501.5	6109	6537.5	7440.5	4939
CD80	368	1873.25	3928.25	3023.75	810.75	1939.25	2442	2505.75	2100	328	962	2600.5	1558	3558.5	1914.75
CD81	11623	11591	11644.5	11507	11062.5	11803.5	11797	11795	11806	11772	11792.5	11821.5	11789	11818	11736.5
CD82	9421	5354.75	5114.75	7321.5	4546	6570	7266.25	7244.75	6081.5	10468	4403.5	7939	5471.5	7529	5716.25
CD83	7372	6114.5	5474.5	8811	6977.5	8588.25	7365	7611.75	7658	6397	10502	7036.25	7837	8610.5	7232.25
CD84	832	6784	2961.25	8804.5	4003.25	4470	5247	4514.25	4433	788	2929	4963.25	3955.5	6069	3616
CD86	287	3345.5	1560.25	4716	2941	7292.75	7581.5	7867.25	7083	286	6476.5	9055	8335	9961.5	5966.25
CD8A	2481	2091.5	2192.25	7211.25	3641.5	7561.75	9694.5	6890.5	6341	2513	5430	10418.2	8111.5	6366.5	1667.25
CD8B	41	1111.75	2411.5	1192.5	1336.25	1588.5	2355.25	964.75	886.5	39	619.5	2497.75	1800.5	921	673.25
CD9	11729	11682	11658.5	11662	11583	7163.5	8854.5	7581.25	5611	11692	6862.5	8483.5	5611	8589	7047.25
CD93	1190	9760.25	8389	8091	9082.5	9083.5	7602.5	8664.5	8931	1275	7501	9161.5	6922.5	8499	8247.25
CD96	1643	2110.5	1583.75	2643	1805.5	4182.5	5786.5	4301.5	3695	1488	2485.5	5515	4587.5	3898.5	2700.25
CD99L2	8528	4985.75	6569.75	5014.25	5888	10979.5	10346.2	10241.2	11086	9735	9787	10747	10225.5	10587.5	10744.8
CDA	1818	3853.5	268	3150.75	2752.75	5388.5	2001.25	1725	7300	1869	1125.5	1636.25	1748	1054	1634.75
CDAN1	4038	3996	3501	3926	4910.5	11722.2	11688	11661	11776	4616	11702.5	11680.5	11716.5	11686	11747.8
CDC123	11084	9399.5	8883.5	9177.5	8810.5	8757	9155.75	9005	7851	11012	8801.5	7846.25	8448	8861.5	8916.25
CDC14A	4739	1844	2688.25	2566.5	3360	3219	3868.75	3281.5	1350	4762	4078	3717.75	2896.5	3405.5	3053.5
CDC14B	3272	6862.5	6820	6438.75	8510	5519.75	5278.25	6064	6437	3345	5909.5	5807.75	5866	4041	6060.5
CDC16	10999	10744.8	10816.2	10763.2	10844	10994.5	10894.5	11340.2	11043	9878	11087	10718.5	11593	10838	10927.5
CDC20	10197.5	2347	1691.5	3091.25	5376.5	10367	10441.2	10451.8	8489	8784.5	10473.5	8799	10613.5	10344.5	9960.5
CDC20B	597	671.5	986.5	1510.75	361.5	1089.5	868	878.5	785	705	397.5	1301	475.5	1092.5	810.5
CDC23	9825	7797.75	7492	7049.5	8947	9169	8808.75	8878.5	8908	9200	10042	8496.5	8925	7969.5	9289.5
CDC25A	6511	252.25	1034	498.75	3715.5	5367	4641.5	5432	4078	6078	7307	3522.25	4974.5	5043	6283.25
CDC25B	8678.5	7187.75	6343.25	7533.5	8947.5	10247	10008	9584.25	9428	10450	9585.5	9479.5	10546	10344.5	9331
CDC25C	5508	165	1430.25	2038.5	2791	4146	4045.75	4075	2850	3384	4698.5	3648	4381.5	3201.5	4848.5
CDC26	4159	8433.5	7072.75	8623	7101	10094.5	10180.5	10259	10472.5	3371	9830	10174	10453.5	9917.5	10453
CDC34	5237	6543	5313.25	6775	4338	6790	7614.75	7586.75	7907	5814	7860	7658	7725	8452.5	7793.25
CDC37	8410	8970.5	8054	9263.5	7570	11641	11608.5	11640.2	11632	7967	11526.5	11608.8	11656.5	11630.5	11684
CDC40	9599	9329.5	8621	9472.25	7018	8005.75	7452	7765	7864	8361	7264	7467.5	7706	7162.5	7751.5
CDC42	7541	10683	10825.5	11081	11027	9050	9631.75	9130.75	9006	7044	6936	8925.75	9563.5	8256.5	8004.5
CDC42BPA	9016	5765.25	5339	3634.75	5258	4965.5	6476	5388.25	6803	10193	6047.5	5736	7950	5855.5	5942.25
CDC42BPB	7341	4565.75	5019.5	3505	4874	6754.5	7642	6707.5	6792	8788	6715	7288.75	8428.5	7120.5	6814.5
CDC42BPG	3438	1174.75	2859.5	1538	1805.5	306	360.5	675.75	409	3525	438	373	776.5	228.5	508
CDC42EP1	3812	2896.5	2343.75	2143	3610.5	5129.5	3848	4397.25	4711	7846	4478.5	4516.5	2667.5	4994.5	5396
CDC42EP2	3086	2453.5	1059.75	832.75	2494	3299	2932	2727.25	2702	3435	2485.5	2753.75	2572.5	2731.5	2669.75
CDC42EP3	8324	7856	10434.2	9243.5	10355.5	2800.5	4356.5	3045.75	1390	10548	771.5	3501.5	4334.5	1705	2884
CDC42EP4	5082	8007.75	7712	7651.25	10268	10046.5	9846	9911	10794	5827	11026.5	10901.2	10887	9744.5	10014
CDC42EP5	4502	6415.5	6619.25	5881	3298	7778.5	6646	8112.25	7645	5518	9845	7837.25	7875	8789	6683.25
CDC42SE1	8539	9257.5	9685	9363.25	11222	8463.5	6825.75	8432	6600	8522	9031.5	7894.25	5315	7162.5	7289
CDC42SE2	10888	10622.5	10759.2	10997	11248	8618.5	7976.25	7429.75	7999	10398	6782	8473	7171	7088.5	6676.75
CDC45	9399	997.5	1287.75	368.75	4693.5	8984	7524.25	9580.5	7242	7760	9321.5	6656.25	8533.5	8422	9713
CDC5L	10587.5	8316.25	8133	8590.75	7778.5	7007.75	8380.75	7324.75	7659	9937.5	7608.5	8106.25	7150.5	6688	7472
CDC7	5210	3724.75	4890.5	4928.5	6213.5	5136	6630	7145.5	4724	4624	6977.5	5592	6537.5	6530	8003.25
CDCA2	7979	1547	1378.75	2389.25	3315.5	4039.25	4820	4216.5	2704	6472	6163.5	2644.25	2812	2888.5	5261.25
CDCA3	7431	3686.25	4388.5	4523	3376.5	6699	6717.75	6775.75	5427	6660	7894.5	5252.25	6328.5	4732.5	7006.25
CDCA4	10334	7793.25	7084.75	6115.75	9274	8461	8532.5	8505	7293	8731.5	8458	7444.75	8428.5	8273	8333.25
CDCA5	7804	2004	858.75	1896.5	4655	9338	8339.5	9595	7540	7342	9183.5	7663.5	8701	8892	9737.5
CDCA7	7996	7722	6566.75	7454	6751	8337	7627	9002.75	5867	6149	11026.5	5715.25	9082.5	7098.5	10105.8
CDCA7L	10225	7936.5	6842.25	5402	10391.5	4243.5	4780.5	5721.75	1610	9396	7075	5078	5903.5	4025.5	6182.25
CDCA8	7162	1543.5	1402.75	1503	2619	6807.5	7272	6731.25	5131	4660	7417	4951.5	7765	6337.5	6316.25
CDCP1	1593.5	7355	5318.75	4246.75	5245.5	2937	3405	2788.75	3117	3345	2183	3255.5	2701	4859	4129
CDH1	5577	11601.5	11504	11514.5	11537.5	7449.5	11104.5	7090	9926	10741	10066.5	10961.8	11360	3951.5	9987.25
CDH11	865	8506.75	9301.5	9057.25	7319	7489.5	7233.75	7578.5	4685	956	5117	7089.75	6879	8422	5009.5
CDH13	2131	4476.25	3556.25	1951.75	2712.5	2925.5	1861	1276.75	1101	2180	1879.5	2415.75	2268.5	882.5	1548.75
CDH15	2814	659.25	1704.25	1973.5	1267	3057	3153	1680.25	2942	2773	1726	2247.5	3146.5	2694	3576
CDH18	800	1056.5	1809.75	681.25	217.5	239.5	638.75	632.25	765	629	692.5	578.25	708	921	373.5
CDH19	3937	5681.5	11108	7010.5	4707.5	6502.5	4585.5	8758.5	5866	4612	8912.5	8677.5	3625	9856	10041
CDH2	9086.5	923	2191.25	688	4756	7781.5	6467.25	9920	10438	3895	2782.5	9759.5	8008.5	9974	6120
CDH23	2392	1802.25	1514.25	837.75	1251.75	2191.5	1844.25	1634.25	4672	2473	2841.5	1422.75	2011.5	1405	2272
CDH24	3183	1590	3391.25	1635.75	3319	2045	2348.5	2234.25	2749.5	3804	2902.5	2258.75	1520	1828.5	2875.75
CDH3	7059	7808.5	7568.25	9982	9746	6087.5	4165.25	6490.25	4711	11517	7936.5	5812.25	6766.5	7440.5	3925.75
CDH4	2983.5	1686.75	2188	1094	823.5	1148.5	535.5	1083.25	2024	2850	1407.5	611.25	776.5	755	1761.25
CDH5	1919	5539	7126.5	5398.25	4457.5	6158	4999	5318.25	6513	1978	5224.5	6011.25	4407.5	4022.5	5307
CDH6	855	2463.5	3567	2048.25	2295.5	2360	1361.25	1887.5	1312	1008	2222	1272.75	998	2462.5	2464.5
CDHR3	1009	1674	2124.75	2012.25	2150	1096.5	626	1340.75	1327	1058	1320.5	1300	121.5	427.5	503
CDIPT	10269	11255.8	10879.5	10586.2	9307	6225.5	8642.25	8102	6153	11052	8319	8521.75	8408	8594.5	7680
CDK1	9341	6077.25	4208.75	9544.75	6193.5	7129	7299.5	8165.75	5106	8489	6997	5937.75	6578	5357	8572.75
CDK10	5985	5139	4226.5	4914.25	6886	9737	8490.25	7510	9990	6583	8458	7035.75	9344.5	7828	9034.5
CDK12	8510	5476	6316.25	6297.75	7281.25	7476.5	5754.75	7557.5	5921	7690	4839.5	6252	5089	6931	5152.25
CDK13	9309	11261	11293	10399.5	9302.5	7869.5	8081.75	6837	7557	9558	8046.5	7423.5	7875	7159	7790.5
CDK14	5339	5962.5	6313.5	5126.5	4949.5	3375	2715.75	3836.5	2599	4703	2138.5	3544	2422	3348	2918.75
CDK16	9581	4021.5	4651.5	4407.75	7660	2188	1252	938.25	602	10387	192.5	539.5	47	1140.5	670.75
CDK17	7769	9108.75	10120.2	9764.25	8505.5	2321	3006.5	3176.25	3065	9812.5	3796.5	3119.5	3342	2353.5	2941
CDK18	4423	1428.5	1298	2206.75	2049.5	4941.5	4987.25	4595.25	5341	5526	8496	6261.25	6419.5	6117	6179.25
CDK19	9141	8044.25	9632.25	7255.5	8805	8829	9151.5	9376.75	9592	8705	9560	9697.5	8836	8925.5	8912.5
CDK2	11767	7251.75	9338.5	10179.8	8704.5	11049.5	10992.2	11334.2	10495	11762	11626.5	11403.2	11343	8790	11521.2
CDK20	3532	2215	3081.75	1476.25	3778.5	6818	6624	6740.5	6673	3997	6629	6711.5	8791.5	7063.5	6480.25
CDK2AP2	5457	3797.25	3457	5061	5824	6398.5	8566.75	7305.5	6616	6220	6340	6787	6481	7850.5	6668.75
CDK4	11098	9690.5	10240	9945.5	9846	11065	10678	11135.5	11071.5	11169	11731	10904	10836.5	10897.5	11295.8
CDK5	8778	3560	2395.5	4780.75	6174.5	7689.5	7775.5	7913.5	7122	7610	8163	7149	7506.5	8066.5	7577
CDK5R1	6710	2111.25	3770	3237	7414.5	8278.5	7375.5	9571.25	7302	7548	9722.5	8203	8428.5	7710.5	6822.25
CDK5RAP1	6332.5	6420.5	5991.5	6305	9114.5	9212	8018.75	9000.75	9142.5	4868	9321.5	8312.5	8773.5	8403.5	8634.5
CDK5RAP2	8159	7209.25	7163	6257.75	9800.5	8618.5	8527.5	9298.25	9714	7211	7093.5	8580.25	9712.5	8200.5	9111.5
CDK5RAP3	9315.5	10281.2	10328.8	10010.5	10520	9948.5	8502.5	9183.5	10468	7003	10235	9913.25	9728.5	8452.5	10152.5
CDK6	10291	8717.25	9958.25	8734	9217	9058.5	10444.8	10049.2	8423	10002	10624	9969.75	10148.5	9103.5	10510
CDK7	5046	8640	7715.75	8502.75	9000.5	7143	8732.5	9778	7752	4508	9738	9573	8533.5	10083	10273.8
CDK8	9038	6752	5918.25	6430.75	10514.5	2824.5	2541.5	2084.25	1777	8679	2523	1988.25	2100.5	1520	2011
CDK9	9823	4005.5	3025	4395.5	3536.5	8076.25	8217	7450.25	7904	9595	6915	7709.5	8258.5	7719	8089.75
CDKAL1	8818	2753.25	2124	3287.75	5637.5	4490	3252	3216.75	2757	8803	3910	4138.25	3176	2913	4033.25
CDKL1	1692	1090.75	2341.25	1438	2982.5	1712.5	2128	972.25	1618	1347	1543.5	2493.75	1846.5	1741	1559.5
CDKL2	936	1666.75	3212.25	2296	1336	1183.5	1178.25	1464.25	1905	1143	1367	2576	868.5	5034.5	1925.5
CDKL3	444	2464	3612.75	2413.5	2208.5	3384	2916.25	4938.75	3436	458	5171.5	3979	4202	3926.5	4962
CDKN1A	6526	9785	7625.25	10684	10862.5	10757.5	10893.2	10247.8	10748	9644	8122.5	11410.8	11370.5	11483.5	11036.8
CDKN1B	4958	10963.8	10675.5	10783	9682	8369.25	8769.25	8835.25	8439	5231	8477.5	9535	8582.5	8285.5	8923.75
CDKN1C	4463	8407.5	10985.2	7835.75	7914	5166	6131.5	4344.5	5165	4421	6047.5	5510	5843.5	4926.5	5040.25
CDKN2A	6676	2944	8151.25	7433.5	3513	4555.5	5569.5	9036.75	1547	4730	8786	3144.75	3023	2660	3822.5
CDKN2AIP	6284	5568.5	5281.5	5791.75	4470.5	5452.5	4869.25	4420.5	4692	6140	4652	5339	4225	4126.5	5291
CDKN2AIPNL	5087	2938.25	3850.25	4389	3349.5	11754.2	11712.5	11734.8	11804	4629	11705.5	11743	11767	11754	11778.5
CDKN2B	5468	8760.25	6598.25	8098.75	7464	5397	5133.5	7811	4532.5	5817	2902.5	3417	998	4451	8206
CDKN2C	6420	7303	5962	6150.5	3351.5	5583.5	3311.75	4847.5	4071	7397	121	5940.25	2100.5	3318	4695.75
CDKN2D	4158	1464.25	1444.75	2300.75	1488	6095	7798	6980.25	5719	4338	3151	6148.75	7150.5	8100.5	5761
CDKN3	10588	2449.25	2466	5326.75	4518	7231.25	7431.5	8839.75	5948	10018	6455.5	6815	8096	6576.5	8614.75
CDO1	601	5336	4413.25	3751.5	1925.5	2372	2338.25	2585.25	9748	859	1635.5	2706.5	2609	2207	2442.5
CDON	4552	8393	7578	6488.75	6380.75	1307.5	1788	1645	1159	6764	2023.5	1655.25	1520	1345.5	2161.25
CDR1	1163	29.75	329.25	3	6778	196	373.75	243.5	1050	67	1219	344.25	105.5	378.5	186.5
CDR2L	3026	3834.75	2142.25	1639	3484	7897	7631.25	8560	6498	3376.5	6208	8606	6900.5	8406.5	7701.25
CDS1	506	8889.25	7209.25	8369.75	5569.5	1226	1368.5	678	1465	559	656	450.25	1558	2328	909.25
CDS2	11000.5	6774	8978.75	5676.75	10259.5	8320	8134.5	7488.75	8449	11114	7608.5	8381.5	8144.5	8606	7074.5
CDT1	5621	1991.5	1962.25	2162.75	2508.5	6391	6014.5	5964.5	4156	6137	7395.5	4284	6120	5533.5	7484.5
CDV3	11629	11170	11225	11166.5	11292.5	9774.5	10087	10003.2	9666	11432	9660.5	10295.2	9937	9188.5	9858.5
CDX1	2640	473.5	990.25	1037.75	1638	1041.5	586.75	690.75	938	2664	291	676.75	475.5	921	697
CDYL	9746.5	8033	8072	7829.5	7834	5938	5883.5	5433.75	5426	9904	6825	6003	6095	4668	5957
CEACAM1	9705	3663.25	5247.25	4801.25	4811.5	9318	10585.2	9623.75	10189	2945	10018	10596	11164	9457.5	10387.8
CEACAM3	3259	2608.5	4055	2980.25	786.25	1260.5	992.25	482.75	1372	2999	397.5	435.5	351.5	585	756
CEACAM6	246	8755	5786.75	2685	2371.5	66	266.75	138.75	556	259	471	194.75	1652.5	208.5	229
CEBPA	1963	10314	9643	9677.5	4865	6358.25	6264.5	6196.25	10309	2033	5707.5	7505	5741	6765	3975.75
CEBPB	6497	11582.5	11293	11609.5	10468	11487.5	11410.5	11513	11365	6666	10918	11397.8	11487	11649	11474.5
CEBPD	5714	10723.5	10380	10659	8603.5	10485.8	10630.5	10088.5	10823	7230	8786	10507.5	9068	11173	10760.8
CEBPG	6518	9051	8402	8306.75	7935	6689.5	7873.5	8548.25	8591	5330	8833.5	7247.75	8464.5	9479	8185.25
CEBPZ	5864	7898.5	8537.5	9215.75	9082.5	9746	10127.5	10308	10513	5717	10808.5	10207.2	10647.5	10366	10506
CECR1	666	7131.75	4838.75	9085	8044	9975.5	10777	10227.5	9791	795	7501	11002.5	10235	10474	5866.5
CECR5	6856	7404	7230.75	7706.25	5598	10316	9115.25	10343.2	10344	5930	10235	8876.25	9666.5	9421.5	9951.25
CECR6	3881	121.5	324.75	828.75	1822.5	2418.5	2167.25	1838.5	2215	3874	2138.5	2549.25	3054	3127.5	2388.25
CEL	1452	862.5	593	195.25	833	2337.5	1084.75	1801.25	2432	1636	2222	1967	1257.5	1314.5	2657
CELF1	10236	11014	11285.8	10864	11471.5	4182.5	3773.5	3845.25	4070	10480	3351	4287.75	2667.5	4035.5	4616.75
CELF2	8127	11188.5	11572	11419.5	11171.5	5939.5	8120.5	5253.25	4427	10677	4748	5174.75	7744.5	3094.5	3657.5
CELF3	3515	311	1197.5	819.5	1964	349.5	425.25	442	560	3969	867.5	303.5	268.5	500.5	328.75
CELF6	2299	2129.75	1611.75	2877	2284.5	3080.25	2649.5	2323	3542	2421	1681	3684.5	2572.5	2165	3623
CELSR1	4787	5975	4111	4225	9272	3909.5	726.5	1204.25	3410	4736	543	1120	1931	699.5	1254.25
CELSR2	5265	8628.75	9035.75	7461	9874	6059.5	7645.75	5937.75	6984	7399	5851.5	8768.75	8616.5	5517.5	7659
CELSR3	3276	1277.75	1264	1576.25	3114.5	5102.5	3813.5	5171.75	3805	3788	6496.5	3756.75	4816.5	4279	4275.5
CEND1	3647	2410.5	1763.5	1810.75	2201.5	2201	3399.75	2553	1632	3745	1826	2336	2508	2576.5	2734.5
CENPA	9741.5	2901	4110.75	2457.25	1935	7540	6887.75	7326.5	4776	8536	6803	5233	6145	6202.5	7745.75
CENPB	6208	5185.5	5505.75	4271.5	3529.25	11220.5	10675.5	11013	10838.5	6954	10887.5	10628.5	10856.5	11109.5	10992.2
CENPBD1	4654	4086	5247.25	2491.75	5580.5	8548.5	7674.75	8720.25	9111	3119	8340.5	8637.25	9082.5	8064	9322.25
CENPE	4151	1568	822.75	1948.75	2560	4222.5	6362	6385.75	5018.5	1210	5851.5	5274	6053.5	5901	6890.75
CENPF	10633	4578	2585.75	4166.75	6514	7419	8347.75	8254	7291.5	8218	10153	7177	9411	7789	9573.75
CENPH	5916	3495	4913	5342	4474.5	3011.5	3430.75	4707.75	2718	3454	4879	3307.25	3176	3170.5	4968.25
CENPI	9887.5	976.75	2329.5	1915.75	2750	2412.5	2307.25	2562.25	1245.5	6751	962	1857.75	2011.5	1092.5	2215.5
CENPJ	8269	5140.5	3065	5520	7226.5	5231	4968	5942.25	5782	4456	6476.5	4769.75	6578	5318.5	6174.5
CENPK	9936	2475.5	1726.25	3405.75	2500	4731	5213.25	5255	1668	6752	5451.5	4176.75	3905.5	3433	5822.5
CENPL	9146	2590.5	2658.75	3710	4567	5720.5	4602.25	5404	4716	6851	5686	4871.5	4354	5318.5	4839.25
CENPM	7948	1534	175.5	2928.75	3258.5	8346.5	9434	9094.75	6684	7553	8927	6225	9653.5	8367	8895.75
CENPN	5410	3397.5	2757.75	4354.75	6298	8174.5	8857	9474.25	6836	4782	9573	6682.25	9068	7420	10623.2
CENPO	8036	1548.25	1724.5	775.5	5696	4229.5	3174	3237.5	1757	6165	2023.5	2288.25	2847	2702	4066.5
CENPQ	5268	2215	1253	2489.75	1744	3796.5	3749.25	4057.5	2157	2359	5117	3801.25	3857.5	3013.5	5141.25
CENPT	5658	4033	4205.75	5137	8103	6903.25	7076.75	7259.25	6556	5924	7138.5	6072.25	7210	6680.5	7001.75
CENPV	6436	2580.25	2633	2074.25	2867	5875	6233.25	8396.5	7350.5	2469	10089.5	4653.75	7950	3428	8164.5
CEP120	5158	7022.5	5783	5878.5	7974.5	1117	1510.25	877.75	359	4354	1172.5	2701.5	377.5	398.5	1810.75
CEP135	1389	3752.25	4218.5	4516	3233.5	5775.5	6434	6036.25	5127	1382	5513.5	6523.75	7254	6520	6507.25
CEP164	4301	7389.25	7589.5	7047.5	4003	5289.25	4703	5098	5958	4299	5780	4287	4267	4761	5222.25
CEP192	8271	4844.25	3768.5	3575.5	5948.5	7406.5	7330.75	7016.5	7274	7930	7032.5	6805	6595.5	6489.5	7739
CEP250	5087	3486.75	3968.75	2466.75	4352.5	3675.5	3599.5	2958.75	3773	4575	3323	3182.25	3955.5	3020.5	3374
CEP290	3164	4525.25	2410.75	4458.75	2272.5	2674	2765	3555.25	1969	1609	3017	2894.5	3199	3522	3691.5
CEP350	7941	9606	10432.5	9761.25	8295	7850.5	8020.25	7680.75	8588	7050	8996.5	8866.75	7706	7564.5	8042.5
CEP55	7440	2004.75	1041.25	4032	7974.75	6344	7608.5	8336.25	5461	5381	7032.5	6469	7422.5	7596	8183.5
CEP57	7537	7444.5	7627.5	8211.75	7133.5	3785.5	4385	4739.5	3911	5190	4698.5	5066.75	3830	3640	4930.5
CEP63	4667	6337.5	5479.75	4733.5	6814	6991.5	8095	8704.25	7284	2669	8377.5	8141.25	9502.5	8185	8753.75
CEP68	5347	10355.5	9537.5	8498.5	6802	4266	4293.25	3235.25	3330	5986	5065	3688.5	2192.5	3505	4100.25
CEP70	7592	3339.5	4163.25	2813.75	2542	3292	3244.5	4134.5	4227	5758	4101.5	1826	3577	4236.5	5367.5
CEP72	4809	3461.25	2556.75	2290.5	3839	3396.75	3969.75	3733.25	1565	3805	3651	4157.5	2701	2099.5	4233
CEP97	8771	4113.75	4917	3657.75	6236	407.5	954.75	834.5	563	7896	656	856.25	1174	864.5	1033.5
CEPT1	9816	7512	7633	7454	9086	9458	9485	9084.5	9155	9549.5	9347.5	9580.75	9378.5	9684.5	9664.75
CER1	826.5	2327.25	1597.5	1301	307	352.5	1529.75	1890.75	914	1099	2023.5	2353.75	2011.5	2462.5	2355.75
CERCAM	6642	5235.75	4280.75	2819.5	4802.25	7171	7903.5	8533.25	6053	8172	9675	9682.25	8096	9744.5	8739.5
CERK	8935	6898.75	7284.25	7340	5725.75	9627.5	9939.5	9363	9540	9859	9905	8367.5	9411	7573	8568.5
CES2	5827	8013	8361.5	7134.25	8440	8700.5	8166.5	8733.25	10444	6850	8878.5	8938.25	7670	8333	9204.25
CES3	1817	3518.5	7408	5731.5	2087.5	2013	1852	775.25	2271	1685	2841.5	1980.5	1303.5	2538	2188.25
CETN2	9766.5	9041.25	8892	9258	8592	10624.2	10366.2	11094.2	10986	8891	10650.5	11026.5	10446.5	11037	10803
CETN3	4575	9686.5	9472.25	9961.5	5730.5	6529.5	7116	8060.25	7956	4408	8122.5	8168.25	6419.5	8012	8259.5
CETP	1147	1116.5	111	174	695	5752.5	2608.25	4067.5	7642	1332	6247	4157.75	2229.5	3433	3348.25
CFB	1499	4204	2906.25	4613	6144.5	6272	5615.75	5008.5	11717	1472	3112.5	6642.5	5176.5	8499	4172.25
CFD	4099	11681	11199.5	11294.5	5613.25	8814.5	7761.5	7663.5	9481	4284	6651	9176.5	7528	9224	7351
CFDP1	4985	8472	8868.5	7697.25	9559.5	5528.5	9455.75	9616.5	8124	4920	10189.5	9069	9728.5	9429	9785
CFH	1063	10896.2	11212.5	10814.5	8137.5	6003	6878.25	5545.75	10442	403	3600.5	6616.25	5422	5971	4616.5
CFI	192	5121.75	3721.75	3130.75	2490.5	3940	6345.25	6330	9633	261	4259.5	6025.75	5154	9819	5697.25
CFL1	11697.5	11758	11772.5	11780.5	11722	11644	11588.8	11670.2	11562	11733	11522.5	11525.5	11553	11649.5	11626.2
CFL2	9586	6518	7310.75	6242.25	7700	3002	3418.75	3065.5	3124	9456	2782.5	3137.25	2380.5	2207	3088
CFLAR	5823	9165	9277.5	9584	6362.5	9482	9156.25	8118.75	10603	5468	7666	9473.25	8061.5	9037.5	8494.5
CFP	1983	715.5	473.5	1301.75	2529.5	2077.5	2793	2109.75	2576	2107	1270	2172.25	2344	1405	2211
CGGBP1	11349	10446.2	10724.8	10592.2	9866	10432	10014.8	10150.2	9488	11495	10212	10663	10829.5	10557.5	10717.2
CGN	2416	4100.25	3937.5	3341.25	4827	3544	2105.25	4359	8752	2491	7190	5278	3700	3235	4429.75
CGNL1	1004	9716	9065.25	7033.5	5260	4781.25	4973	4683	10430	974	1772.5	5847.5	5903.5	4035.5	2646.75
CGREF1	4597	2105	1744.25	418.5	2130	1319.25	1216.25	1818	1305	2517	2523	2236.5	1846.5	3339.5	2255
CGRRF1	2525	5076.25	6671.25	5138.25	5628	6491	5802.5	6815.25	7000	2037	5286	6452.5	5223	6294.5	6696.25
CH25H	1418	3132.75	2773.25	6444.25	3381.25	3026.5	1770.75	3618.5	2291	1528	1826	1801.75	515.5	4123.5	4315
CHAC1	2218	429.25	1222	542	1436.5	2466.5	3195.25	1029.25	3813	2761	619.5	631.75	3435	4048.5	1570.75
CHAC2	2010	1444.5	469.5	3153.75	1782.5	1916.5	1512	1926.75	329	1280	771.5	796	1303.5	1361.5	2268.75
CHAD	2208	1038	428.5	381.5	1358	1764.5	1846.5	1880.5	3050	2389	9738	1234.75	2147	1629	1455.75
CHAF1A	7285	4357.5	4204.25	4081	5848	4133.5	4260.25	3692.75	2238	6785	3770.5	1650	3461.5	3104	3893.5
CHAF1B	7604	2073.5	3241.25	3310.75	4181.5	6511.5	7549	7118.75	5064.5	6975	5729.5	5862.5	8026	5090	6368
CHAT	2796	381.5	460	232.5	375.5	2922.5	1132.75	1216.5	3645	2799	867.5	1500	187	1676	1439.75
CHCHD1	5365	9242.5	8240.5	10221	6331.5	5681	6294.25	7318.5	5902	5160	6651	6192.5	6376.5	6348.5	6327
CHCHD10	7613	8620.5	9100.5	9649.25	7026	10690.5	10448	9487.25	11299	8332	11317.5	9867.5	10856.5	10453.5	11325.5
CHCHD2	5582	11562.5	11552.8	11598.5	11545.5	11754	11714	11749	11750	4232	11769	11716.5	11743.5	11722.5	11738.2
CHCHD3	11434	7301	7782.75	7991.5	9689.5	8554.5	9178.75	9882	8583	11110	9914	9521.5	9411	8256.5	8840
CHCHD4	4349	6065.5	5841	5946	5573	8734.75	9267.5	9188.25	9141	3314	9859	9736.75	9411	9120.5	9774.25
CHCHD5	4671	4742	5386	5586	5539.25	8549.5	8784	8875.5	8710	4735	9031.5	7948.75	9926	7941.5	8540.75
CHCHD6	6076	3710.5	7654.5	3569	4903	10380.5	11383.5	11353.8	10989	5430	11445.5	11614.8	11560.5	11414.5	10802.5
CHCHD7	8312	6974.25	5962	8247.25	8142.5	7416.5	8227.5	8136.75	7517	8004	10248	7642.75	7837	9188.5	6772
CHD1	8747	7842.25	7835.25	8011	7613.5	8337.5	8491.25	9095.25	8728	6838	9487	8772	8736.5	8797.5	9509.25
CHD1L	9792	8982.5	8948	9147.5	9223	7470.5	7667.75	7403.25	7473	9250	9031.5	7776.75	7913.5	8222	6753.25
CHD2	6630	8036	7399	8114.5	6854	3603	2942.5	3639.25	3641	6795	1635.5	3325.25	3412.5	3495.5	3385
CHD3	7236	4709.25	6658.5	5484.25	6128	3572.75	5576	3795.75	8703	9015.5	5707.5	4255.75	6095	3462	4503.5
CHD4	11082	8355.75	8521.5	8587	8331.5	10575.5	10454	10363.2	10768	11241	11143	10325.2	10887	10351	10429.8
CHD5	2667	181.5	1423.25	519.25	1326	971	1389.75	896.75	1255	2822	1826	1228.75	1520	1405	1302.25
CHD6	9026	5954.25	6746.5	4533	7349	5409.25	6304.25	6269.5	5414	8103	7285	6479.5	7744.5	5769.5	6671
CHD9	8136	10757.5	11057	10116	6419.5	9693.5	10392.2	10265	9601	7849	10631.5	10075.5	10682.5	10463	10519.2
CHDH	2353	2907.5	3814.75	3119.5	3162	376	1429.25	1647	991	2577	4303	963	223	1002.5	1066.5
CHEK1	9764.5	1989.75	1886.5	3476	3386.5	5310.5	4914.75	5362	3916	9646	4698.5	4263.25	4176	4667.5	6166.5
CHEK2	4907	2886.5	3162.5	4560	4986	4810	3935.25	6163.25	4815	3129	6997	4187.5	3675.5	4560.5	6014
CHERP	6652	8409.25	8581	7749.25	11029.5	6001	6766.25	6087.5	5993	7575	7245	6440.75	7422.5	6026.5	7089.75
CHFR	7968	9153.5	8049.75	8466.5	6325	9365.5	9171.25	8874.75	8856	8408	7936.5	8533.5	9546.5	7758	7945
CHGA	1190	899.25	1926.5	696.75	502.5	1448.5	2141.25	2189.75	2102	1269	3628.5	1865	2422	1866.5	2480
CHGB	961	907.5	1715.25	1576.5	268.75	1191.5	642.75	711.25	1617	803.5	4816.5	305	1392.5	273	2772
CHI3L2	605	3667.25	2903.25	6009.25	3420.5	3239	858	2006	909	711	1270	1635.25	776.5	2017	2464
CHIC2	6039	8709.75	7455	8751	4882	9531.5	9528.5	9592	8686	7235	8082.5	9633	9228	9578	9465
CHKA	9637.5	4431	4164.5	4308.25	4164.5	8641.5	7960	9459.5	9505	8388	8644	7822.25	8873	8550	8509.25
CHL1	9891	7391.5	11281.5	7580.75	5437.5	2587	3819.5	2328.5	1339	5117	2138.5	5559.5	1971	1092.5	2688.75
CHM	7712	7858	8559	7955	7154	7770.5	7364.5	7481.75	7350	7275	6564.5	7811.5	8388.5	8273	7689.75
CHML	7724	6215.25	9756.5	8767	4037.5	3409	4337.75	3229.75	3871	7495	3866.5	3648.5	3725.5	3513.5	3388
CHMP1A	9100	5998.5	6426.5	6344	7844	8718.5	8458.75	8161.75	8847	9102	8477.5	7402	8516.5	8099.5	8078.25
CHMP1B	11015	9380.75	8676.25	10187.5	5621.5	9316.5	8102.5	8696.75	7300	10779	7800	8490.5	6922.5	8031.5	8875.75
CHMP2A	11583	10920.8	10298.5	10797	10672	11138	10959.2	11212	11071.5	11560	11162.5	11167.2	11126.5	11045.5	10857.8
CHMP2B	9457.5	9399.75	8992.75	10303	8010	7542.5	7129.75	7942.75	6385	9159	7577	8321.25	8533.5	6652.5	7518.5
CHMP4B	8359	10962	10922.5	10865	7872.25	9325	9273.75	9784.75	8582	8330	9687	9500.75	9425.5	9372	8550.25
CHMP5	7829	10486.8	9824.75	10935	8296.5	8926.5	10926	11136.8	8228	7655	10832	11250.2	10916.5	10900	11163.2
CHMP6	5847	3946.5	4282.25	4551.25	4189.5	7346	7952.25	7178.5	7692	6490	7032.5	8157.75	8239.5	8010.5	6658.75
CHMP7	6590	6020.5	5972.75	5940.25	6211	4463.75	4527.25	4250.25	4184	6736	3910	4642.75	3312	4437.5	4510.75
CHN1	2570	5498.5	4889	7853.25	6478.5	7429.5	5873.5	8463	4062	7347	3651	7790.75	5041	9031	7802.75
CHN2	4259	2664.25	4447.25	5183.75	3916	5418	5940	5092.75	8816	3084	10650.5	3676.25	5803	4101	4426.5
CHODL	701	2006.5	2099.5	889	983.5	3736	935.5	1071.25	4138	923	438	421	1392.5	1228	737.25
CHORDC1	6958	8150.5	8277	9506.5	6958.25	5190	5256	6209.5	2900	5343	5513.5	5831.5	5041	6841.5	6799.25
CHPF	8598	4152.5	5602.75	4273	3465	8210.5	8741.25	7881.25	8079	9823	9081	8654	9755	9792	7655
CHPT1	8584	10147.5	10237	10236.2	9689	9679.25	9895.75	10064	9319	9531	9014.5	9186.5	8819	8707	10147
CHRAC1	7755	5517.75	6665.75	5117.75	6498.5	5099	6328.25	5149	4411	8045	7766	5680.25	5446	5744.5	5777.75
CHRD	3606	2973.5	2935	2267.5	1259.5	2216	2775.5	1162.5	4352	3758	692.5	1667.75	1846.5	1479.5	1732.75
CHRDL1	764	10698.5	9694.25	10238.8	3580.75	873.5	992	760	629	1049	1407.5	134.5	1257.5	585	881.25
CHRDL2	233	812.25	459.25	145	888.5	442	1887.75	2069	2600	313	1270	1810.25	2896.5	2032.5	1963
CHRM1	1936	1319.5	412.5	754	948.5	966	1626.5	296	1773	2182	4192.5	875.5	2737.5	553.5	498.25
CHRM3	2034	3849.75	1981.75	2133.25	2116	1920.5	1722.25	2373.75	2225	2192	962	1468.25	2468	825	2270.5
CHRNA1	2386	903.5	822.75	773.5	1172	2124	1595	3051.75	2485	1894	2369	2428.25	1040	1885	1235.5
CHRNA3	1759	432	2298	2246.5	1341.25	1924.25	1913	1525.5	1639	1980	1772.5	1788.75	2307.5	1138.5	1857
CHRNA5	5064	476.5	1890.25	1149	215.5	10884.5	10555.2	10410.2	11647	3911	10358	10866.5	11106	11006.5	11144
CHRNA6	701	1124.75	1918.75	2175.25	1058	2337.5	1749.75	1880.75	2498	363	819	2757.5	1748	2309.5	2129.5
CHRNA9	829	1006.75	1824.5	4171.25	128.5	929	870	1238	1498	706	2023.5	985	1392.5	1054.5	1432
CHRNB1	3849	1856.5	2163.75	2536	1205.5	4648.5	4559.5	4844.25	5445	3730	3820.5	5184.5	4662.5	5019.5	6101.75
CHST1	1157	1920.75	2436.5	2059.5	1594.5	3469.5	3616.75	3338	3471	1684	2902.5	3591.75	2422	3117	3457.75
CHST10	8341	3488.5	4171.5	4713.5	4588	6247.75	6020.75	5363	6359	7172	7417	4827.25	8335	5965.5	6276
CHST12	8318	6726.5	6178.75	6424.5	3594.5	7820	7444.75	6405.25	7726	7957	6071	6788.5	6652.5	5777	6783.5
CHST13	3862	1294	1437.75	1137	1916.75	3871	3476.5	2622.25	9148	4081	6399	2866.25	1931	3898.5	4527.25
CHST14	6367	4286.75	5479.25	4395.25	6722.5	6624	6837.75	6577.5	5293	6159	5983.5	5943.25	7377.5	7325.5	6774.75
CHST2	7252	2931.75	4422.75	3908.5	5881	3271.5	2828.75	4192.75	4752	7558	2841.5	3469.5	2380.5	3680	3596
CHST3	3659	4355	3503	3359	5202	6468.5	7354.75	7353.75	6124	4589	6318	7526.75	7590	9054	7383
CHST6	5009	29.5	202.5	315.75	1735.5	4835.5	5423	5173.75	3819.5	4415	3454	2863.5	5967	7274.5	5300.75
CHST7	3016	2135	1617.25	1272	3254	6640	5549	5178.75	6364	2642	3994	5949.5	5741	5675	5505.25
CHST9	686	664.25	1342.75	993.75	721	820.5	1342.5	771	2803	685	9065.5	2710.5	5588.5	405	545.25
CHSY1	8675	10270.5	10289.2	10059.2	9873.5	10517.8	9936.75	10562.2	9746	8931	6915	10837.2	10546	10514.5	10324.8
CHSY3	3911	1497	4800	2477.75	3101.5	6387	5350	6479	5058	5130	7626.5	7761.5	7894.5	7042	6621.5
CHTF18	5449	3471	3725.75	3780	5650.5	5826.25	5139.5	4604.75	4919	5349	5612.5	4303.25	6701	4391.5	5958.25
CHTF8	9540	8174.25	8880.5	8296.75	10091.5	3055	1809.75	1930	2659	9776	2138.5	1424.75	1303.5	2317.5	2061.75
CHUK	10048	5761.25	4492.5	6231	5551.5	7045.25	6734.5	7482	7775	9268	7190	6782.25	6652.5	7400	7251.25
CHURC1	7386	8657	8969	9568.5	7875	7903.25	7794	10384.2	7800	6692	7138.5	8979.25	7670	10782	8019.25
CIAO1	9473	5734	6061.5	5554.75	7082.5	10434.5	10852.2	10653.8	10784	9509	10855.5	10816.2	11312.5	10844.5	11166
CIAPIN1	3191	8326	8517.5	8020.25	9790	7006.75	6622	7106.5	6690	2896	7972	5964.75	7233	6725.5	7644
CIB1	5964	8217.5	8168.75	9544.75	8006.25	11405	11176.5	11314.5	11471	6097	10582.5	11162	11447.5	11407.5	11357.8
CIB2	1698	3279	3875.25	4088.25	5291	3810.75	3450.5	3800.75	4070	3238	7482	3225.25	3225	3978.5	5549.25
CIC	5234	4500.75	4815.5	4528.75	5298	6444	7293.25	6129	7046	7046	7666	6750.5	8182	6366.5	6205
CIDEA	1708	6509.5	5924	9128.5	2897	1605.5	2196.75	2008.75	1771	1566	1826	2388.25	1971	2702	2522
CIDEB	2025	4825.5	4151.75	4155.25	4486.25	4259.75	4376	3583	9097	3230	1448.5	7041.25	1800.5	3902	4660
CIDEC	1988	6921.75	5308	3470.5	2559	1739	2555.25	2113	1990	2068	1726	2070	2468	2165	2214.5
CIDECP	2852	2071.5	1826.5	1615.25	2415.5	8401	7715.75	9075.5	7073	2370	7561	9333.5	6811.5	7641.5	8289.5
CIITA	3767	2845.25	718.75	4871.5	5130	3577.25	3512.75	3030.25	2345	2807	2330	3975.75	2774	3669.5	1202
CILP	1527	6696	6139.25	8037.75	4234	3647.5	5611	6416	4078	1448	4630.5	3239	8111.5	3741	1957.5
CINP	7732	2869.75	3919	3626.5	2781	4796.5	5562	5165.5	4113	8145	5065	5563.25	6031.5	5012	5261
CIR1	1573	5688.25	2247.5	4776.5	4974.5	4678.5	6956.25	7130	6666	829	8143	7712.25	6857	7120.5	7542.75
CIRBP	11264	11558	11684.5	11306.5	11770	11348.5	11556.8	11528.5	11281	11160	10977.5	11611	11588.5	11317	11545.2
CIRH1A	11570	8376	8569	8638.5	10716	10334.5	10115.2	10480.8	10362	11303	10631.5	9514.5	10546	10052.5	10722.2
CISD1	10847	7849	8821	9375.75	9565	10737	10386.8	10892.5	11201	9702	10598.5	10721.8	10091.5	10819	10451
CISD2	10733	6967.25	7545.25	7283.75	11088.5	7001	7992.75	7933	7899	10469	7800	7745.5	7528	7737.5	7049.25
CISH	3011	5057	6410	6902.25	4119.5	3246.5	3078	2826	2963	3240	3294.5	2551.5	2344	3995	2347.25
CITED1	7108	385.75	586.75	415.5	4079	4783	7255.75	8669.25	4144	6163	1077	7217	7316	9341.5	6386.25
CITED2	6973	9918	7247.5	9715	6498	7723	7662.25	8376.5	8447	7332	7626.5	7796.75	6724	8328.5	6923.5
CITED4	3919	3429.5	3454	2448	2363.5	4242	4506	4670	5749	4051	3820.5	4228.75	5131	5057	3077.25
CIZ1	8637	7089.5	4360.25	4438	9460	2799.5	3845.5	2608.75	2338	9413	4124.5	2580	3930	3142	3453
CKAP2	10983	5568.25	4667.75	7233	4539	6240	7140	7098.75	5742	10180	8143	4675.5	6288.5	5222.5	7418.75
CKAP2L	8999	1087.75	1709	2039.25	3097	5460.5	7387.5	6638.5	4311	6661	8122.5	5169.25	8464.5	7248.5	6868.25
CKAP4	9590	10365.8	9983.5	10183	11380	10248	10137.2	10323.5	10066	9612	10281.5	10155.2	9862.5	10339.5	10389.8
CKAP5	10824	7166	5692	7903.5	7011	10419	10486.5	10790	10333.5	10985	10677.5	10816.2	10556	10747	10719.5
CKB	3148	8132.25	8388.5	6073.75	5889.5	5196	4685	6769.5	6009	6140	4020.5	4998.25	7336	9286.5	5238.25
[truncated: 9,838 more rows]
