# Supplementary material for: An Exercise-Induced Metabolic Shield in Distant Organs Blocks Cancer Progression and Metastatic Dissemination
Source: Oxford University Press journal article supplement (doi:10.1158/0008-5472.can-22-0237), 2022-09-09
Supplement: can-22-0237_supplementary_table_s4_suppst4.xlsx [file can-22-0237_supplementary_table_s4_suppst4.xlsx]

## Sheet: Table S4
Table S4 Physical characteristics, heart rate and running pace of the healthy recreationally active females.
SON	Age	Weight	Height	Heart rate (beats/min)	Pace
	(years)	(kg)	(cm)		(km/h)
1	30	62.4	1.65	150	10
2	33	61.3	1.6	167	8.9
3	36	53.7	1.58	151	10.1
4	24	61.6	1.7	190	9.2
5	26	63.95	1.61	170	8.6
6	32	69.9	1.68	174	8.5
7	42	59.9	1.65	145	8.5
AVG	31.9	61.8	1.64	164	9.1
SD	6.1	4.8	0.04	51	0.7
SON indicates Subject number
