# Supplementary material for: An Exercise-Induced Metabolic Shield in Distant Organs Blocks Cancer Progression and Metastatic Dissemination
Source: Oxford University Press journal article supplement (doi:10.1158/0008-5472.can-22-0237), 2022-09-09
Supplement: can-22-0237_supplementary_table_s5_suppst5.xlsx [file can-22-0237_supplementary_table_s5_suppst5.xlsx]

## Sheet: Table S5
Supplementary Table S5 Primers and oligonucleotides
mCherry_F	GAACGGCCACGAGTTCGAGA
mCherry_R	CTTGGAGCCGTACATGAACTGAGG
Mlana_F	ACGAAGTGGATACAGAACCTTG
Mlana_R	GGCTGATGGGATTTCTCTTGA
Tyrp1_F	GGTCTTTGACGAATGGCTAAGG
Tyrp1_R	CCAGAATGGCACCATGTTGTA
GLUT1_F	TCGTCGTTGGCATCCTTATTG
GLUT1_R	AGGGCTGGGATGAAGATGA
GLUT2_F	CCCTTGTCACAGGCATTCTTA
GLUT2_R	CACAGCAGATAGGCCAAGTAG
GLUT3_F	GACTCTTTGTCAACCGCTTTG
GLUT3_R	ATAAGGCAGCCCGCAAT
GLUT4_F	GGTGGCATGATCTCTTCCTTTC
GLUT4_R	CCAACACGGCCAAGACATT
GLUT8_F	CTA GTG GCA CCG GTT TAC AT
GLUT8_R	TGC CAG TGA CAA CCA TCA G
GLUT10_F	CTT CTC GGT TGG CTT TGG A
GLUT10_R	GAG AGG CTG ATA AAG AGG TTA GC
ALDOA_F	CCCTGGCCATCATGGAA
ALDOA_R	GGCTCCACAATGGGTACAA
GRP75_F	TGATCACAGTCCCTGCTTATTT
GRP75_R	CAGCAGCTGTAGGCTCATT
HPRT_F	GGATTTGAATCACGTTTGTGTC
HPRT_R	AACTTGCGCTCATCTTAGGC
GAPDH_F	TTCACCACCATGGAGAAGGC
GAPDH_R	CCCTTTTGGCTCCACCCT
36B4_F	GTCACTGTGCCAGCTCAGAA
36B4_R	TCAATGGTGCCTCTGGAGAT
m_TFAM_F	TCTTGTCTGTATTCCGAAGTGTT
m_TFAM_R	TTTGGGTAGCTGTTCTGTGG
m_POLRMT_F	ATGTTCGCACCATCCAGAG
m_POLRMT_R	AGGACCAGGTCAGTGAAGA
m_TFB1M_F	CTGAGCTTCTGGTGGTTGAA
m_TFB1M_R	GCACATCTCCATGAACAATTCG
m_TFB2M_F	GGTCAGCAGGTGTTCCTATAAA
m_TFB2M_R	GATTCGCAGGAGTACAGATCG
m_Cyc1_F	TGTGCTACACGGAGGAAGAA
m_Cyc1_R	CTGGCCGCATGAACATCTC
m_Mrps35_F	CAACATCCCTCAGATCCAGTATAAG
m_Mrps35_R	GAATCTAGATAGAACCGCAGGAAG
